# Supplementary material for: Exploring the mechanism of the reductive amination of acetophenones via the Borch approach: the role of the acid catalyst
Source: Royal Society of Chemistry journal article supplement (doi:10.1039/d4ob00160e), 2024-01-01
Supplement: d4ob00160e1.pdf [file d4ob00160e1.pdf]

## ELECTRONIC SUPPLEMENTARY INFORMATION

### **Exploring the mechanism of the reductive amination of acetophenones *via* Borch approach: the role of the acid catalyst**

João Pedro de Albuquerque Souza,<sup>a</sup> Amanda Krauskopf Jacobs,<sup>b</sup> Leandro Piovan<sup>a</sup> and Renan B. Campos<sup>\*b</sup>

<sup>a</sup>*Department of Chemistry, Universidade Federal do Paraná (UFPR), Av. Cel. Francisco H. dos Santos, 100, Curitiba, Paraná, Brazil*

<sup>b</sup>*Academic Department of Chemistry and Biology, Universidade Tecnológica Federal do Paraná (UTFPR), Rua Deputado Heitor Alencar Furtado, 5000, Curitiba, Paraná, Brazil*

*\* renan.borsoi@gmail.com*

## SUMMARY

|                                                                                                                                                                                                         |           |
|---------------------------------------------------------------------------------------------------------------------------------------------------------------------------------------------------------|-----------|
| <b>1. IRCs FOR THE ACETOPHENONE'S AMINATION.....</b>                                                                                                                                                    | <b>7</b>  |
| Figure S1. IRC plot for the nucleophilic attack for pathway a (A) without and (B) with ethanol assistance obtained with M06-2X/6-31+G(d,p) level of theory .....                                        | 7         |
| Figure S2. IRC plot for the intramolecular protonation of the zwitterionic intermediate in pathway a (A) without and (B) with ethanol assistance obtained with M06-2X/6-31+G(d,p) level of theory ..... | 7         |
| Figure S3. IRC plot for the prototropism in pathway b obtained with M06-2X/6-31+G(d,p) level of theory .....                                                                                            | 7         |
| Figure S4. IRC plot for the nucleophilic attack for pathway c (A) without and (B) with ethanol assistance obtained with M06-2X/6-31+G(d,p) level of theory .....                                        | 8         |
| Figure S5. IRC plot for the nucleophilic attack for (A) pathway d and (B) pathway e obtained with M06-2X/6-31+G(d,p) level of theory .....                                                              | 8         |
| Figure S6. IRC plot for (A) the step ii (dehydration – TSS2 of highest energy) and (B) the step iii (reduction – TSS3) obtained with M06-2X/6-31+G(d,p) level of theory .....                           | 8         |
| <b>2. IRCs FOR THE 4-NITROACETOPHENONE'S AMINATION .....</b>                                                                                                                                            | <b>9</b>  |
| Figure S7. IRC plot for the nucleophilic attack for (A) pathway a and (B) pathway c obtained with M06-2X/6-31+G(d,p) level of theory .....                                                              | 9         |
| Figure S8. IRC plot for the step ii (dehydration) through (A) the TSS2 of lowest energy and (B) the TSS2 of highest energy obtained with M06-2X/6-31+G(d,p) level of theory .....                       | 9         |
| Figure S9. IRC plot for the step iii (reduction – TSS3) obtained with M06-2X/6-31+G(d,p) level of theory .....                                                                                          | 9         |
| <b>3. IRCs FOR THE 4-(THIOMETHYL)ACETOPHENONE'S AMINATION .....</b>                                                                                                                                     | <b>10</b> |
| Figure S10. IRC plot for the nucleophilic attack for (A) pathway a and (B) pathway c obtained with M06-2X/6-31+G(d,p) level of theory .....                                                             | 10        |
| Figure S11. IRC plot for the step ii (dehydration) through (A) the TSS2 of lowest energy and (B) the TSS2 of highest energy obtained with M06-2X/6-31+G(d,p) level of theory .....                      | 10        |
| Figure S12. IRC plot for the step iii (reduction – TSS3) obtained with M06-2X/6-31+G(d,p) level of theory .....                                                                                         | 10        |
| <b>4. IRCs FOR THE 4-HYDROXYACETOPHENONE'S AMINATION .....</b>                                                                                                                                          | <b>11</b> |
| Figure S13. IRC plot for the nucleophilic attack for (A) pathway a and (B) pathway c obtained with M06-2X/6-31+G(d,p) level of theory .....                                                             | 11        |
| Figure S14. IRC plot for the step ii (dehydration) through (A) the TSS2 of lowest energy and (B) the TSS2 of highest energy obtained with M06-2X/6-31+G(d,p) level of theory .....                      | 11        |
| Figure S15. IRC plot for the step iii (reduction – TSS3) obtained with M06-2X/6-31+G(d,p) level of theory .....                                                                                         | 11        |
| <b>5. IRCs FOR THE 4-(N-DIMETHYLAMINO)ACETOPHENONE'S AMINATION .....</b>                                                                                                                                | <b>12</b> |
| Figure S16. IRC plot for (A) the step ii (dehydration – TSS2) and (B) the step iii (reduction – TSS3) obtained with M06-2X/6-31+G(d,p) level of theory .....                                            | 12        |
| Figure S17. IRC plot for the step ii (dehydration) through (A) the TSS2 of lowest energy and (B) the TSS2 of highest energy obtained with M06-2X/6-31+G(d,p) level of theory .....                      | 12        |
| Figure S18. IRC plot for the step iii (reduction – TSS3) obtained with M06-2X/6-31+G(d,p) level of theory .....                                                                                         | 12        |
| <b>6. OPTIMIZED GEOMETRIES FOR THE ACETOPHENONE'S AMINATION .....</b>                                                                                                                                   | <b>13</b> |

|                                                                                                                                                                                          |           |
|------------------------------------------------------------------------------------------------------------------------------------------------------------------------------------------|-----------|
| <b>6.1. Optimized Reactants.....</b>                                                                                                                                                     | <b>13</b> |
| Table S1. Optimized structure of acetic acid in cartesian coordinates<br>(M06-2X/6-311++G(d,p)//M06-2X/6-31+G(d,p)).....                                                                 | 13        |
| Table S2. Optimized structure of ammonia in cartesian coordinates<br>(M06-2X/6-311++G(d,p)//M06-2X/6-31+G(d,p)).....                                                                     | 13        |
| Table S3. Optimized structure of acetophenone in cartesian coordinates<br>(M06-2X/6-311++G(d,p)//M06-2X/6-31+G(d,p)).....                                                                | 13        |
| Table S4. Optimized structure of cyanoborohydride in cartesian coordinates<br>(M06-2X/6-311++G(d,p)//M06-2X/6-31+G(d,p)).....                                                            | 14        |
| Table S5. Optimized structure of ethanol in cartesian coordinates<br>(M06-2X/6-311++G(d,p)//M06-2X/6-31+G(d,p)).....                                                                     | 14        |
| <b>6.2. Optimized Minima Structures for Step i of the Mechanism (Hemiaminal Formation) .....</b>                                                                                         | <b>14</b> |
| Table S6. Optimized structure of the hydroxy-ammonium ion in cartesian coordinates<br>(M06-2X/6-311++G(d,p)//M06-2X/6-31+G(d,p)).....                                                    | 14        |
| Table S7. Optimized structure of the hemiaminal in cartesian coordinates<br>(M06-2X/6-311++G(d,p)//M06-2X/6-31+G(d,p)).....                                                              | 15        |
| <b>6.2.1. Optimized Structures for Pathway a .....</b>                                                                                                                                   | <b>16</b> |
| Table S8. Optimized TSS1 (nucleophilic attack) for pathway a in cartesian coordinates<br>(M06-2X/6-311++G(d,p)//M06-2X/6-31+G(d,p)).....                                                 | 16        |
| Table S9. Optimized TSS1 (nucleophilic attack) with ethanol assistance for pathway a in cartesian coordinates<br>(M06-2X/6-311++G(d,p)//M06-2X/6-31+G(d,p)).....                         | 16        |
| Table S10. Optimized structure of the zwitterionic intermediate for pathway a in cartesian coordinates<br>(M06-2X/6-311++G(d,p)//M06-2X/6-31+G(d,p)).....                                | 17        |
| Table S11. Optimized structure of the zwitterionic intermediate with ethanol assistance for pathway a in cartesian coordinates (M06-2X/6-311++G(d,p)//M06-2X/6-31+G(d,p)) .....          | 18        |
| Table S12. Optimized TSS for the intramolecular proton transfer in the zwitterionic intermediate for pathway a in cartesian coordinates (M06-2X/6-311++G(d,p)//M06-2X/6-31+G(d,p)) ..... | 19        |
| <b>6.2.2. Optimized Structures for Pathway b .....</b>                                                                                                                                   | <b>20</b> |
| Table S13. Optimized protonated ketone for pathway b in cartesian coordinates<br>(M06-2X/6-311++G(d,p)//M06-2X/6-31+G(d,p)).....                                                         | 20        |
| <b>6.2.3. Optimized Structures for Pathway c .....</b>                                                                                                                                   | <b>20</b> |
| Table S14. Optimized TSS1 for pathway c without ethanol assistance in cartesian coordinates<br>(M06-2X/6-311++G(d,p)//M06-2X/6-31+G(d,p)).....                                           | 20        |
| Table S15. Optimized TSS1 for pathway c with ethanol assistance in cartesian coordinates<br>(M06-2X/6-311++G(d,p)//M06-2X/6-31+G(d,p)).....                                              | 21        |
| <b>6.2.4. Optimized Structures for Pathway d .....</b>                                                                                                                                   | <b>22</b> |
| Table S16. Optimized TSS1 for pathway d in cartesian coordinates<br>(M06-2X/6-311++G(d,p)//M06-2X/6-31+G(d,p)).....                                                                      | 22        |
| <b>6.2.5. Optimized Structures for Pathway e .....</b>                                                                                                                                   | <b>23</b> |
| Table S17. Optimized TSS1 for pathway e in cartesian coordinates<br>(M06-2X/6-311++G(d,p)//M06-2X/6-31+G(d,p)).....                                                                      | 23        |
| <b>6.3. Optimized Structures for Step ii (Dehydration) and iii (Reduction) of the Mechanism .....</b>                                                                                    | <b>24</b> |
| Table S18. Optimized TSS2 (lowest energy) in cartesian coordinates<br>(M06-2X/6-311++G(d,p)//M06-2X/6-31+G(d,p)).....                                                                    | 24        |

|                                                                                                                                                                        |           |
|------------------------------------------------------------------------------------------------------------------------------------------------------------------------|-----------|
| Table S19. Optimized TSS2 (highest energy) in cartesian coordinates<br>(M06-2X/6-311++G(d,p)//M06-2X/6-31+G(d,p)).....                                                 | 24        |
| Table S20. Optimized structure of iminium in cartesian coordinates<br>(M06-2X/6-311++G(d,p)//M06-2X/6-31+G(d,p)).....                                                  | 25        |
| Table S21. Optimized TSS3 in cartesian coordinates (M06-2X/6-311++G(d,p)//M06-2X/6-31+G(d,p)).....                                                                     | 26        |
| <b>6.4. Optimized Products .....</b>                                                                                                                                   | <b>26</b> |
| Table S22. Optimized structure of ethyl-phenyl-amine in cartesian coordinates<br>(M06-2X/6-311++G(d,p)//M06-2X/6-31+G(d,p)).....                                       | 26        |
| Table S23. Optimized structure of cyano-borane in cartesian coordinates<br>(M06-2X/6-311++G(d,p)//M06-2X/6-31+G(d,p)).....                                             | 27        |
| Table S24. Optimized structure of acetate in cartesian coordinates<br>(M06-2X/6-311++G(d,p)//M06-2X/6-31+G(d,p)).....                                                  | 27        |
| Table S25. Optimized structure of water in cartesian coordinates<br>(M06-2X/6-311++G(d,p)//M06-2X/6-31+G(d,p)).....                                                    | 28        |
| <b>6.5. Optimized Ion Pair Conformers.....</b>                                                                                                                         | <b>28</b> |
| Table S26. Optimized structure of hydroxy-ammonium ion/acetate ion pair with lower energy in cartesian<br>coordinates (M06-2X/6-311++G(d,p)//M06-2X/6-31+G(d,p)).....  | 28        |
| Table S27. Optimized structure of hydroxy-ammonium ion/acetate ion pair with higher energy in cartesian<br>coordinates (M06-2X/6-311++G(d,p)//M06-2X/6-31+G(d,p))..... | 29        |
| Table S28. Optimized structure of iminium/acetate ion pair with lower energy in cartesian coordinates<br>(M06-2X/6-311++G(d,p)//M06-2X/6-31+G(d,p)).....               | 29        |
| Table S29. Optimized structure of iminium/acetate ion pair with higher energy in cartesian coordinates<br>(M06-2X/6-311++G(d,p)//M06-2X/6-31+G(d,p)).....              | 30        |
| <b>7. OPTIMIZED GEOMETRIES FOR THE 4-NITROACETOPHENONE'S AMINATION .....</b>                                                                                           | <b>31</b> |
| Table S30. Optimized structure of 4-nitroacetophenone in cartesian coordinates<br>(M06-2X/6-311++G(d,p)//M06-2X/6-31+G(d,p)).....                                      | 31        |
| Table S31. Optimized TSS1 (nucleophilic attack) for pathway a in cartesian coordinates<br>(M06-2X/6-311++G(d,p)//M06-2X/6-31+G(d,p)).....                              | 31        |
| Table S32. Optimized TSS1 (nucleophilic attack) for pathway c in cartesian coordinates<br>(M06-2X/6-311++G(d,p)//M06-2X/6-31+G(d,p)).....                              | 32        |
| Table S33. Optimized structure of the zwitterionic intermediate for pathway a in cartesian coordinates<br>(M06-2X/6-311++G(d,p)//M06-2X/6-31+G(d,p)).....              | 33        |
| Table S34. Optimized structure of the hydroxi-ammonium ion in cartesian coordinates<br>(M06-2X/6-311++G(d,p)//M06-2X/6-31+G(d,p)).....                                 | 34        |
| Table S35. Optimized structure of the hemiaminal in cartesian coordinates<br>(M06-2X/6-311++G(d,p)//M06-2X/6-31+G(d,p)).....                                           | 34        |
| Table S36. Optimized TSS2 (lowest energy) in cartesian coordinates<br>(M06-2X/6-311++G(d,p)//M06-2X/6-31+G(d,p)).....                                                  | 35        |
| Table S37. Optimized TSS2 (highest energy) in cartesian coordinates<br>(M06-2X/6-311++G(d,p)//M06-2X/6-31+G(d,p)).....                                                 | 36        |
| Table S38. Optimized structure of iminium in cartesian coordinates<br>(M06-2X/6-311++G(d,p)//M06-2X/6-31+G(d,p)).....                                                  | 37        |
| Table S39. Optimized TSS3 in cartesian coordinates (M06-2X/6-311++G(d,p)//M06-2X/6-31+G(d,p)).....                                                                     | 37        |

|                                                                                                                                                           |           |
|-----------------------------------------------------------------------------------------------------------------------------------------------------------|-----------|
| Table S40. Optimized structure of ethyl-4-nitrophenyl-amine in cartesian coordinates<br>(M06-2X/6-311++G(d,p)//M06-2X/6-31+G(d,p)).....                   | 38        |
| <b>8. OPTIMIZED GEOMETRIES FOR THE 4-(THIOMETHYL)ACETOPHENONE'S AMINATION.....</b>                                                                        | <b>39</b> |
| Table S41. Optimized structure of 4-(thiomethyl)acetophenone in cartesian coordinates<br>(M06-2X/6-311++G(d,p)//M06-2X/6-31+G(d,p)).....                  | 39        |
| Table S42. Optimized TSS1 (nucleophilic attack) for pathway a in cartesian coordinates<br>(M06-2X/6-311++G(d,p)//M06-2X/6-31+G(d,p)).....                 | 39        |
| Table S43. Optimized TSS1 (nucleophilic attack) for pathway c in cartesian coordinates<br>(M06-2X/6-311++G(d,p)//M06-2X/6-31+G(d,p)).....                 | 40        |
| Table S44. Optimized structure of the zwitterionic intermediate for pathway a in cartesian coordinates<br>(M06-2X/6-311++G(d,p)//M06-2X/6-31+G(d,p))..... | 41        |
| Table S45. Optimized structure of the hydroxi-ammonium ion in cartesian coordinates<br>(M06-2X/6-311++G(d,p)//M06-2X/6-31+G(d,p)).....                    | 42        |
| Table S46. Optimized structure of the hemiaminal in cartesian coordinates<br>(M06-2X/6-311++G(d,p)//M06-2X/6-31+G(d,p)).....                              | 42        |
| Table S47. Optimized TSS2 (lowest energy) in cartesian coordinates<br>(M06-2X/6-311++G(d,p)//M06-2X/6-31+G(d,p)).....                                     | 43        |
| Table S48. Optimized TSS2 (highest energy) in cartesian coordinates<br>(M06-2X/6-311++G(d,p)//M06-2X/6-31+G(d,p)).....                                    | 44        |
| Table S49. Optimized structure of iminium in cartesian coordinates<br>(M06-2X/6-311++G(d,p)//M06-2X/6-31+G(d,p)).....                                     | 45        |
| Table S50. Optimized TSS3 in cartesian coordinates (M06-2X/6-311++G(d,p)//M06-2X/6-31+G(d,p)).....                                                        | 45        |
| Table S51. Optimized structure of ethyl-4-(thiomethyl)phenyl-amine in cartesian coordinates<br>(M06-2X/6-311++G(d,p)//M06-2X/6-31+G(d,p)).....            | 46        |
| <b>9. OPTIMIZED GEOMETRIES FOR THE 4-HYDROXYACETOPHENONE'S AMINATION .....</b>                                                                            | <b>47</b> |
| Table S52. Optimized structure of 4-hydroxyacetophenone in cartesian coordinates<br>(M06-2X/6-311++G(d,p)//M06-2X/6-31+G(d,p)).....                       | 47        |
| Table S53. Optimized TSS1 (nucleophilic attack) for pathway a in cartesian coordinates<br>(M06-2X/6-311++G(d,p)//M06-2X/6-31+G(d,p)).....                 | 48        |
| Table S54. Optimized TSS1 (nucleophilic attack) for pathway c in cartesian coordinates<br>(M06-2X/6-311++G(d,p)//M06-2X/6-31+G(d,p)).....                 | 48        |
| Table S55. Optimized structure of the zwitterionic intermediate for pathway a in cartesian coordinates<br>(M06-2X/6-311++G(d,p)//M06-2X/6-31+G(d,p))..... | 49        |
| Table S56. Optimized structure of the hydroxi-ammonium ion in cartesian coordinates<br>(M06-2X/6-311++G(d,p)//M06-2X/6-31+G(d,p)).....                    | 50        |
| Table S57. Optimized structure of the hemiaminal in cartesian coordinates<br>(M06-2X/6-311++G(d,p)//M06-2X/6-31+G(d,p)).....                              | 50        |
| Table S58. Optimized TSS2 (lowest energy) in cartesian coordinates<br>(M06-2X/6-311++G(d,p)//M06-2X/6-31+G(d,p)).....                                     | 51        |
| Table S59. Optimized TSS2 (highest energy) in cartesian coordinates<br>M06-2X/6-311++G(d,p)//M06-2X/6-31+G(d,p)).....                                     | 52        |
| Table S60. Optimized structure of iminium in cartesian coordinates<br>(M06-2X/6-311++G(d,p)//M06-2X/6-31+G(d,p)).....                                     | 53        |

|                                                                                                                                                           |           |
|-----------------------------------------------------------------------------------------------------------------------------------------------------------|-----------|
| Table S61. Optimized TSS3 in cartesian coordinates (M06-2X/6-311++G(d,p)//M06-2X/6-31+G(d,p)).....                                                        | 53        |
| Table S62. Optimized structure of ethyl-4-hydroxyphenyl-amine in cartesian coordinates<br>(M06-2X/6-311++G(d,p)//M06-2X/6-31+G(d,p)).....                 | 54        |
| <b>10. OPTIMIZED GEOMETRIES FOR THE 4-(N-DIMETHYLAMINO)ACETOPHENONE'S AMINATION .....</b>                                                                 | <b>55</b> |
| Table S63. Optimized structure of 4-(N-dimethylamino)acetophenone in cartesian coordinates<br>(M06-2X/6-311++G(d,p)//M06-2X/6-31+G(d,p)).....             | 55        |
| Table S64. Optimized TSS1 (nucleophilic attack) for pathway a in cartesian coordinates<br>(M06-2X/6-311++G(d,p)//M06-2X/6-31+G(d,p)).....                 | 55        |
| Table S65. Optimized TSS1 (nucleophilic attack) for pathway c in cartesian coordinates<br>(M06-2X/6-311++G(d,p)//M06-2X/6-31+G(d,p)).....                 | 56        |
| Table S66. Optimized structure of the zwitterionic intermediate for pathway a in cartesian coordinates<br>(M06-2X/6-311++G(d,p)//M06-2X/6-31+G(d,p))..... | 57        |
| Table S67. Optimized structure of the hydroxi-ammonium ion in cartesian coordinates<br>(M06-2X/6-311++G(d,p)//M06-2X/6-31+G(d,p)).....                    | 58        |
| Table S68. Optimized structure of the hemiaminal in cartesian coordinates<br>(M06-2X/6-311++G(d,p)//M06-2X/6-31+G(d,p)).....                              | 59        |
| Table S69. Optimized TSS2 (lowest energy) in cartesian coordinates<br>(M06-2X/6-311++G(d,p)//M06-2X/6-31+G(d,p)).....                                     | 60        |
| Table S70. Optimized TSS2 (highest energy) in cartesian coordinates<br>(M06-2X/6-311++G(d,p)//M06-2X/6-31+G(d,p)).....                                    | 61        |
| Table S71. Optimized structure of iminium in cartesian coordinates<br>(M06-2X/6-311++G(d,p)//M06-2X/6-31+G(d,p)).....                                     | 62        |
| Table S72. Optimized TSS3 in cartesian coordinates (M06-2X/6-311++G(d,p)//M06-2X/6-31+G(d,p)).....                                                        | 62        |
| Table S73. Optimized structure of ethyl-4-(N-dimethylamino)phenyl-amine in cartesian coordinates<br>(M06-2X/6-311++G(d,p)//M06-2X/6-31+G(d,p)).....       | 63        |
| <b>11. ACID-CATALYZED REDUCTION OF ACETOPHENONE .....</b>                                                                                                 | <b>64</b> |
| Scheme S1. Mechanism of the acid-catalyzed reduction of acetophenone .....                                                                                | 64        |
| Table S74. Optimized TS for the acid-catalyzed reduction of the acetophenone<br>(M06-2X/6-311++G(d,p)//M06-2X/6-31+G(d,p)).....                           | 64        |

## 1. IRCs FOR THE ACETOPHENONE'S AMINATION

Figure S1. IRC plot for the nucleophilic attack for pathway a (A) without and (B) with ethanol assistance obtained with M06-2X/6-31+G(d,p) level of theory

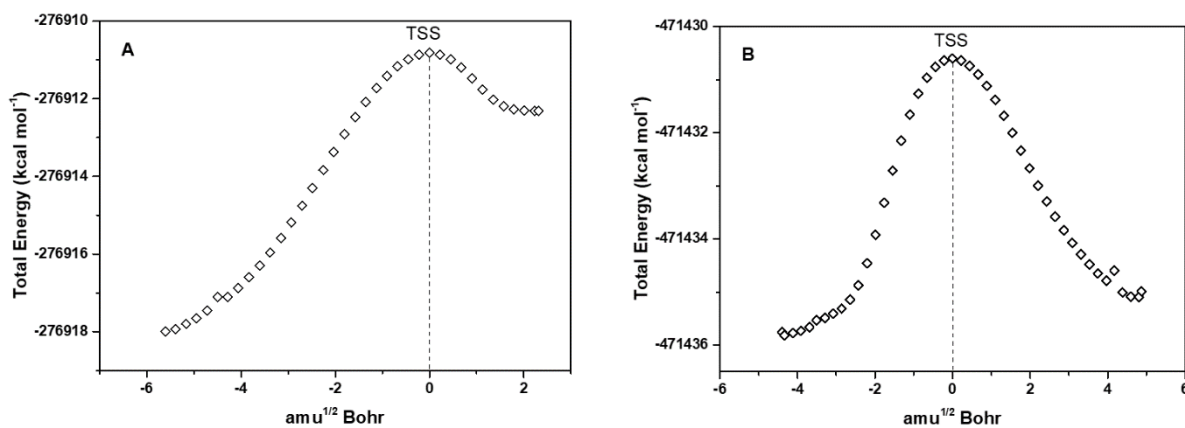

Figure S2. IRC plot for the intramolecular protonation of the zwitterionic intermediate in pathway a (A) without and (B) with ethanol assistance obtained with M06-2X/6-31+G(d,p) level of theory

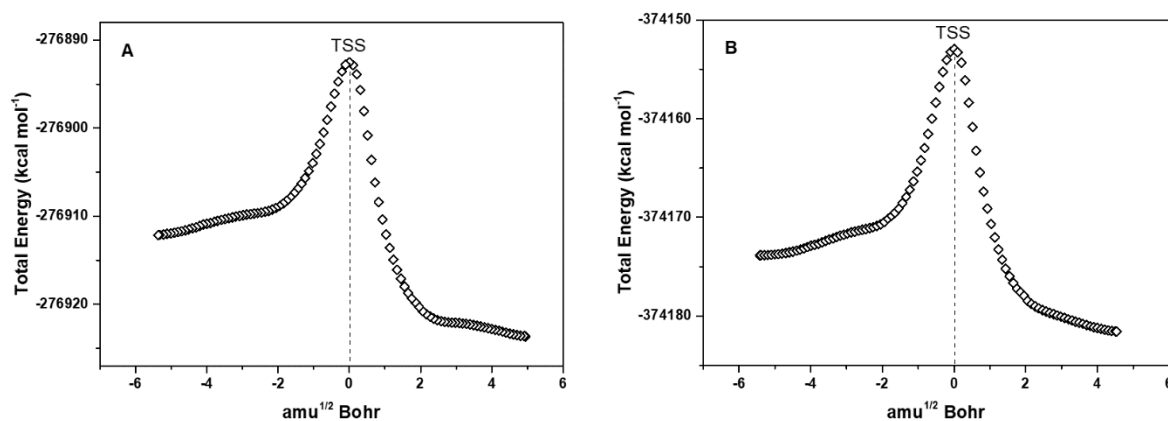

Figure S3. IRC plot for the prototropism in pathway b obtained with M06-2X/6-31+G(d,p) level of theory

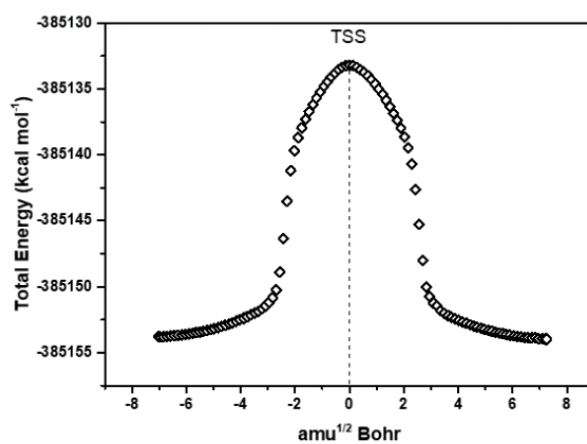

Figure S4. IRC plot for the nucleophilic attack for pathway c (A) without and (B) with ethanol assistance obtained with M06-2X/6-31+G(d,p) level of theory

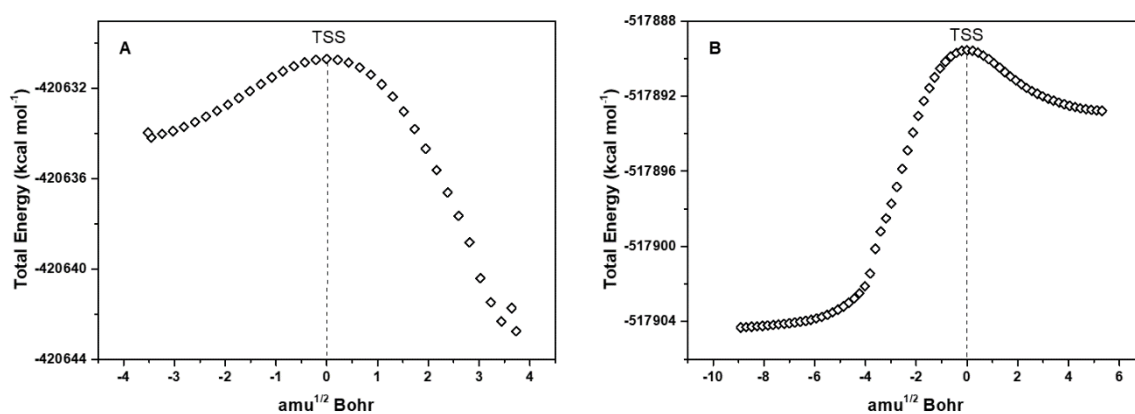

Figure S5. IRC plot for the nucleophilic attack for (A) pathway d and (B) pathway e obtained with M06-2X/6-31+G(d,p) level of theory

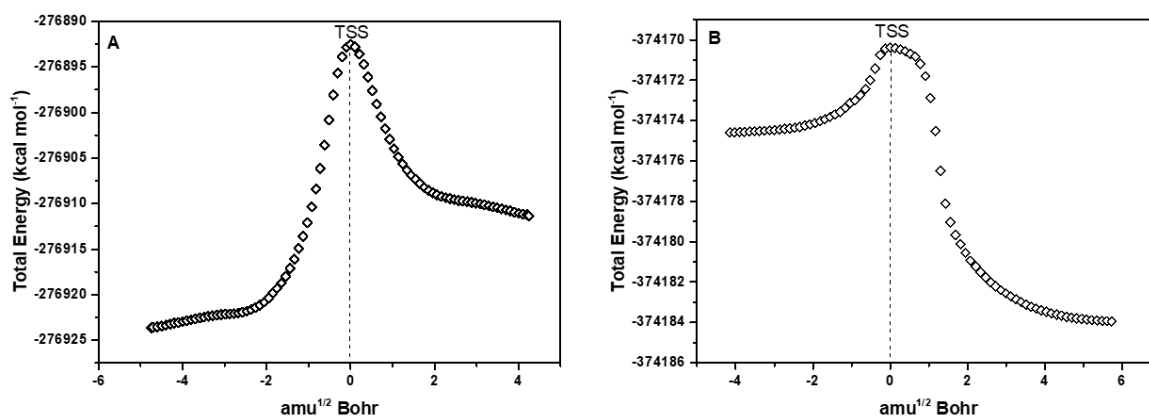

Figure S6. IRC plot for (A) the step ii (dehydration – TSS2 of highest energy) and (B) the step iii (reduction – TSS3) obtained with M06-2X/6-31+G(d,p) level of theory

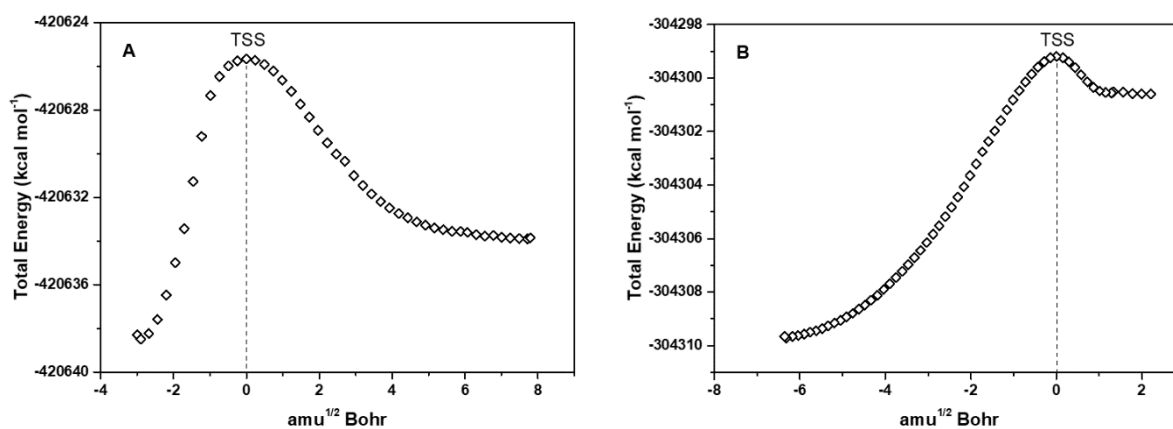



## 2. IRCs FOR THE 4-NITROACETOPHENONE'S AMINATION

Figure S7. IRC plot for the nucleophilic attack for (A) pathway a and (B) pathway c obtained with M06-2X/6-31+G(d,p) level of theory

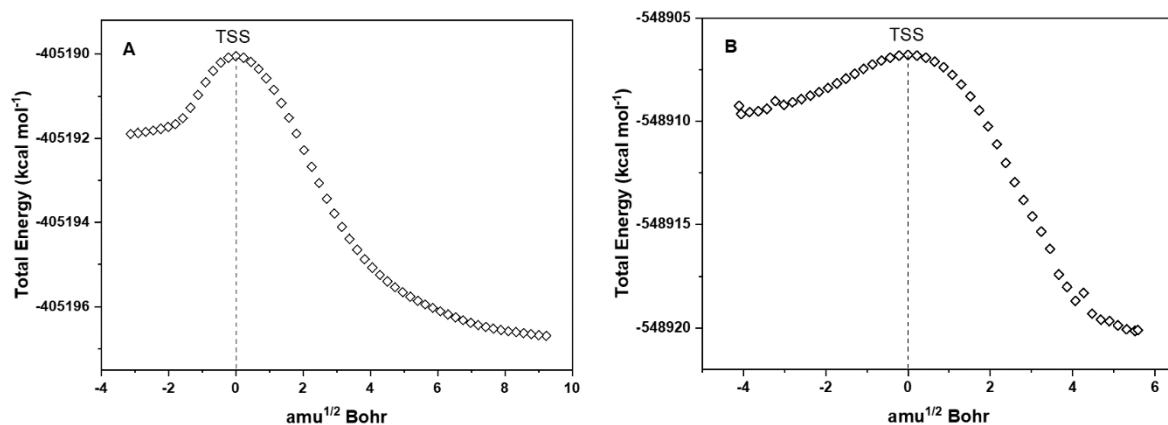

Figure S8. IRC plot for the step ii (dehydration) through (A) the TSS2 of lowest energy and (B) the TSS2 of highest energy obtained with M06-2X/6-31+G(d,p) level of theory

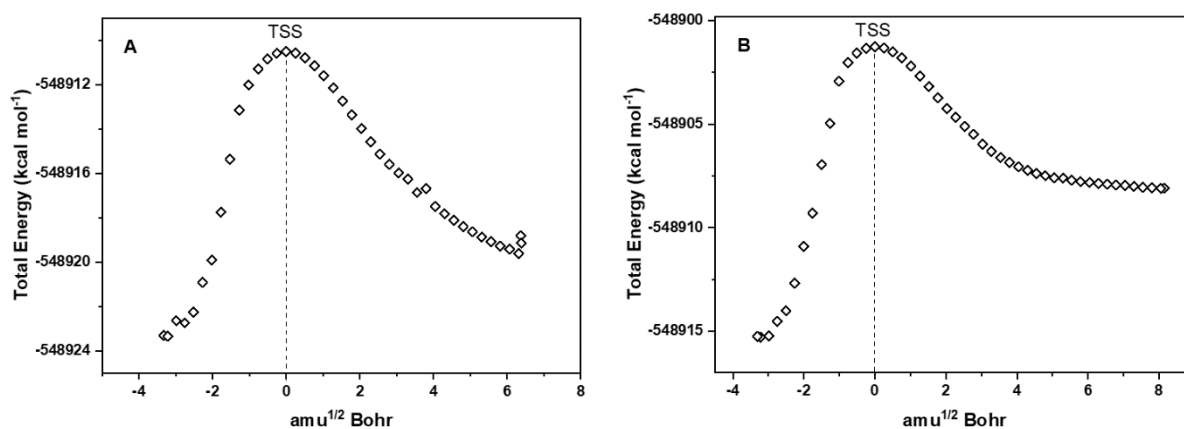

Figure S9. IRC plot for the step iii (reduction – TSS3) obtained with M06-2X/6-31+G(d,p) level of theory

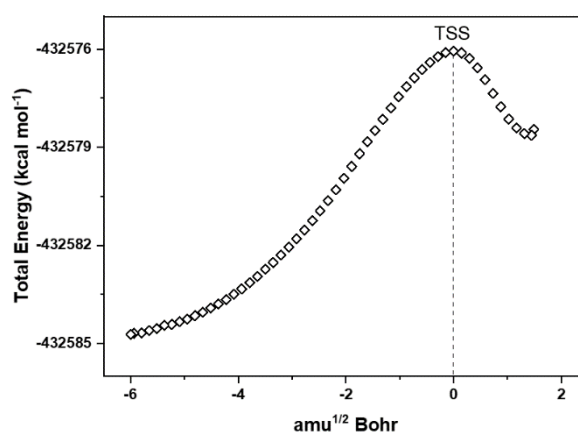

### 3. IRCs FOR THE 4-(THIOMETHYL)ACETOPHENONE'S AMINATION

Figure S10. IRC plot for the nucleophilic attack for (A) pathway a and (B) pathway c obtained with M06-2X/6-31+G(d,p) level of theory

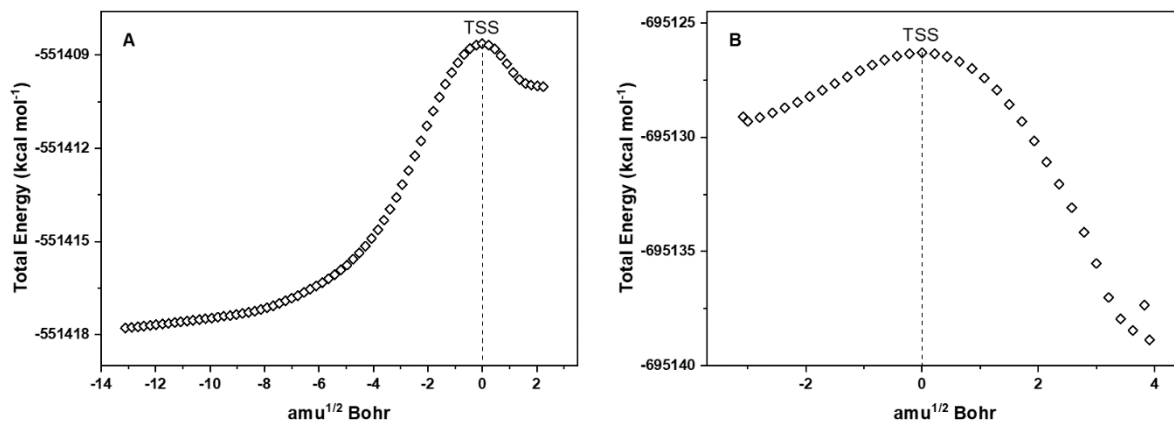

Figure S11. IRC plot for the step ii (dehydration) through (A) the TSS2 of lowest energy and (B) the TSS2 of highest energy obtained with M06-2X/6-31+G(d,p) level of theory

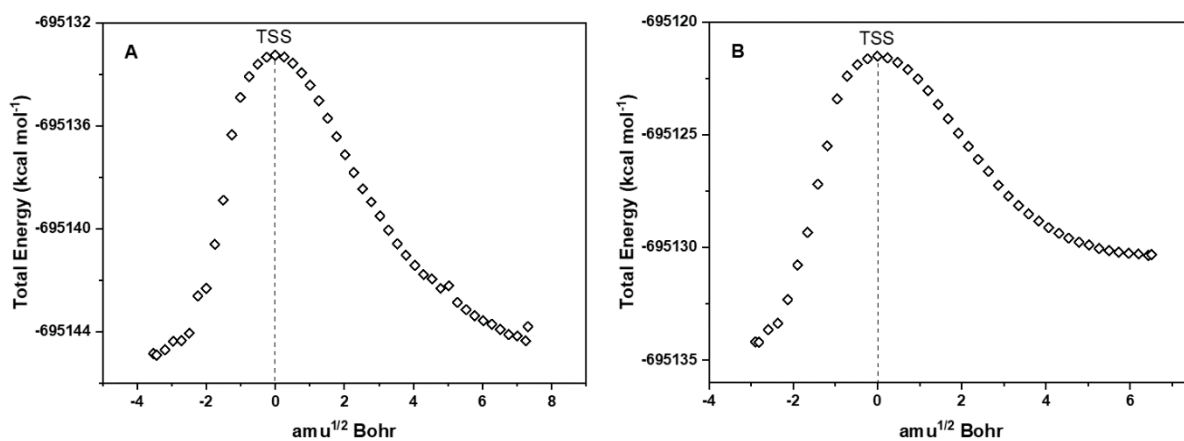

Figure S12. IRC plot for the step iii (reduction – TSS3) obtained with M06-2X/6-31+G(d,p) level of theory

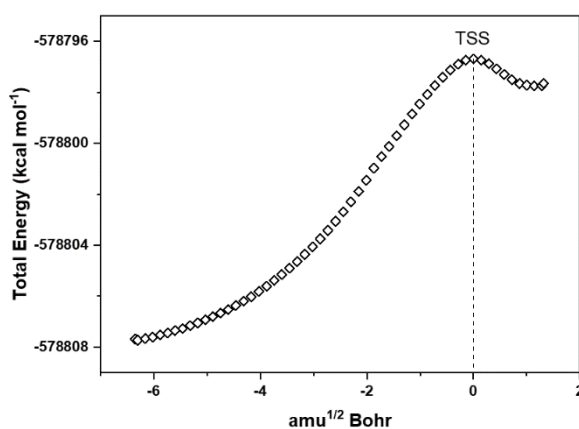

#### 4. IRCs FOR THE 4-HYDROXYACETOPHENONE'S AMINATION

Figure S13. IRC plot for the nucleophilic attack for (A) pathway a and (B) pathway c obtained with M06-2X/6-31+G(d,p) level of theory

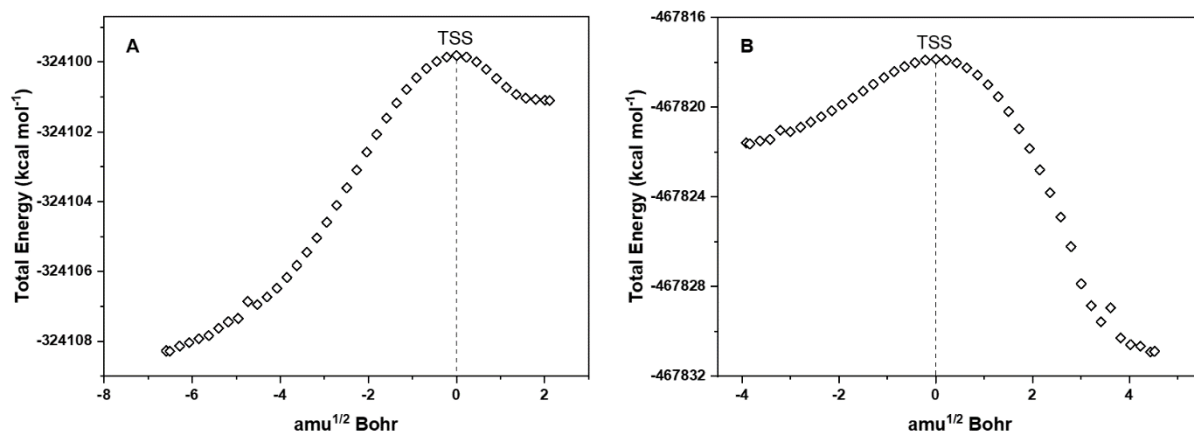

Figure S14. IRC plot for the step ii (dehydration) through (A) the TSS2 of lowest energy and (B) the TSS2 of highest energy obtained with M06-2X/6-31+G(d,p) level of theory

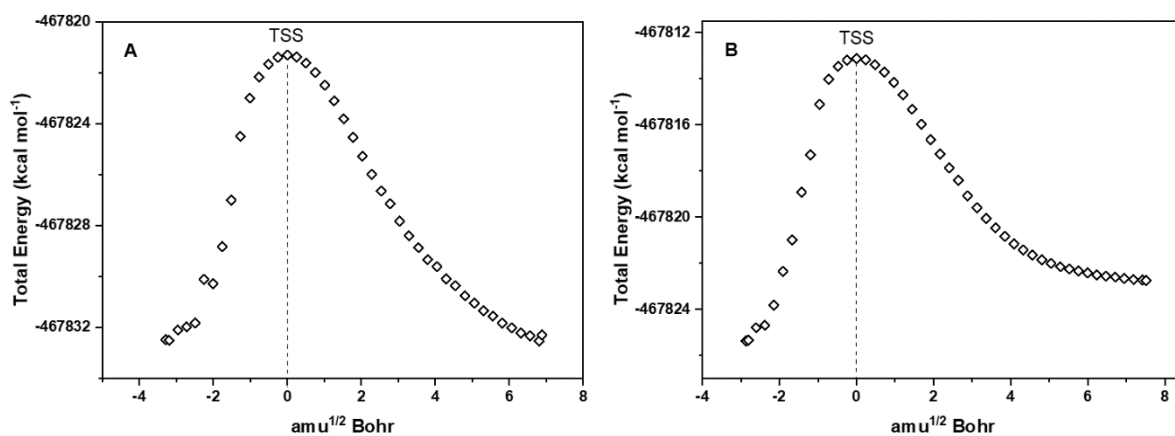

Figure S15. IRC plot for the step iii (reduction – TSS3) obtained with M06-2X/6-31+G(d,p) level of theory

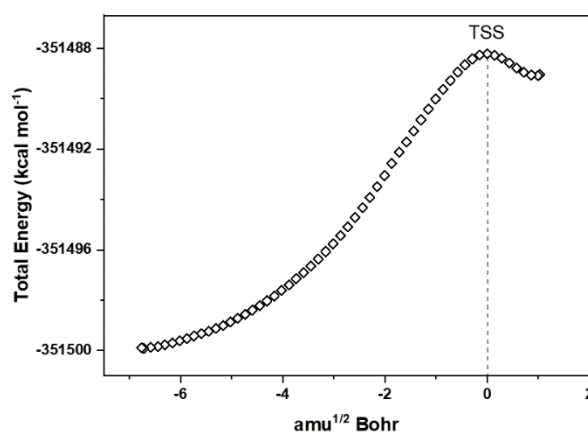

## 5. IRCs FOR THE 4-(N-DIMETHYLAMINO)ACETOPHENONE'S AMINATION

Figure S16. IRC plot for (A) the step ii (dehydration – TSS2) and (B) the step iii (reduction – TSS3) obtained with M06-2X/6-31+G(d,p) level of theory

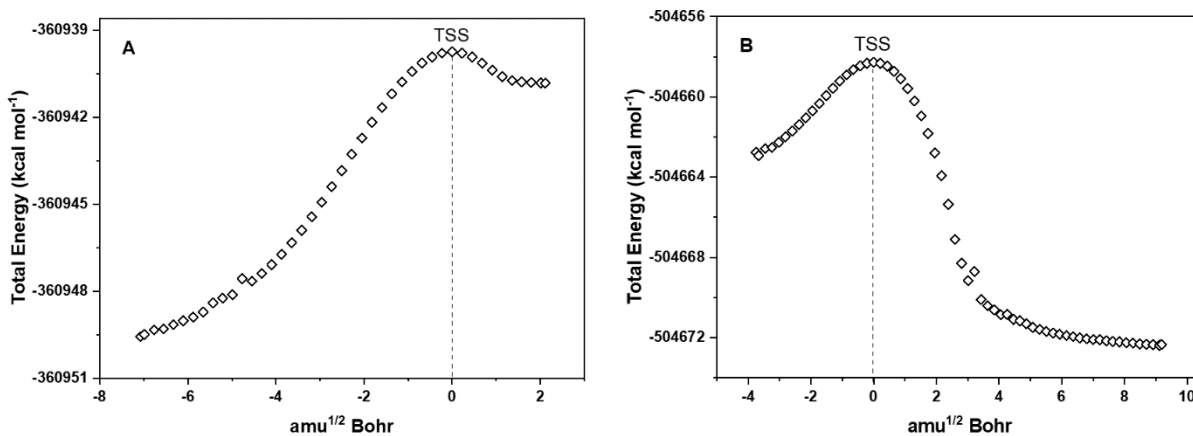

Figure S17. IRC plot for the step ii (dehydration) through (A) the TSS2 of lowest energy and (B) the TSS2 of highest energy obtained with M06-2X/6-31+G(d,p) level of theory

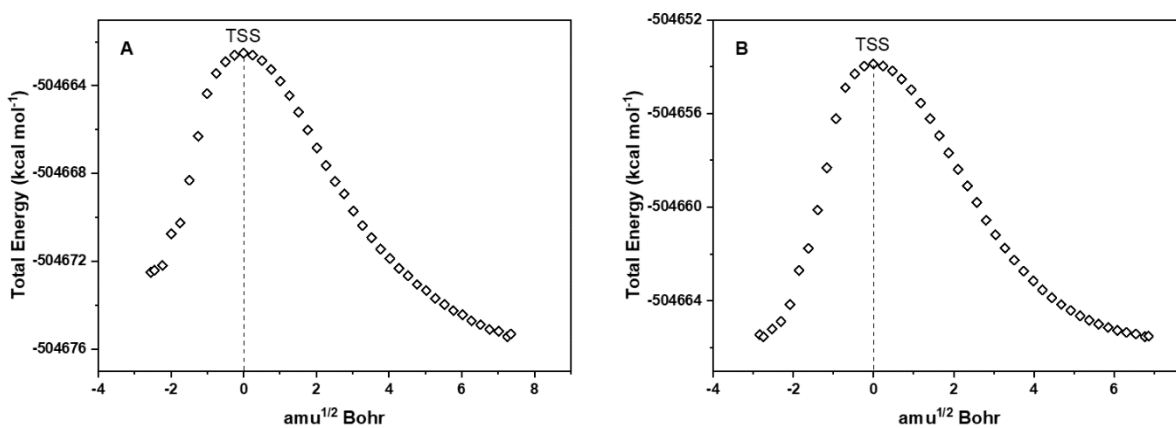

Figure S18. IRC plot for the step iii (reduction – TSS3) obtained with M06-2X/6-31+G(d,p) level of theory

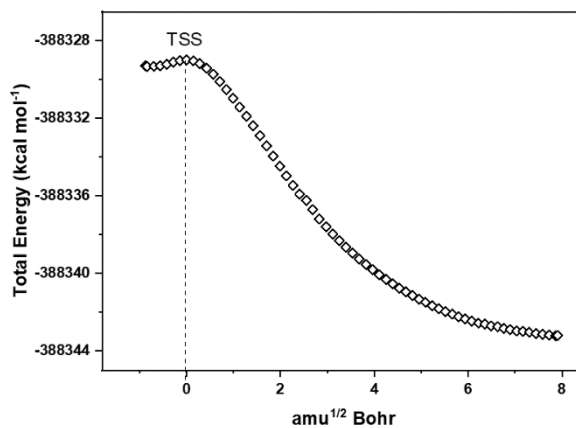

## 6. OPTIMIZED GEOMETRIES FOR THE ACETOPHENONE'S AMINATION

### 6.1. Optimized Reactants

Table S1. Optimized structure of acetic acid in cartesian coordinates (M06-2X/6-311++G(d,p)//M06-2X/6-31+G(d,p))

---

Sum of electronic and thermal Free Energies = -229.046833 Hartrees  
Number of imaginary frequencies = 0

---

|   |             |             |             |
|---|-------------|-------------|-------------|
| C | -0.74504900 | 0.35356200  | 0.00028300  |
| C | -0.05780200 | -0.97662500 | 0.00005800  |
| H | -0.76965300 | -1.80091800 | 0.00033200  |
| H | 0.58231400  | -1.03473900 | -0.88400500 |
| H | 0.58328000  | -1.03472100 | 0.88339000  |
| O | -2.07993700 | 0.26495800  | -0.00257100 |
| O | -0.16874400 | 1.42566400  | 0.00260200  |
| H | -2.46257500 | 1.16084400  | -0.00245300 |

---

Table S2. Optimized structure of ammonia in cartesian coordinates (M06-2X/6-311++G(d,p)//M06-2X/6-31+G(d,p))

---

Sum of electronic and thermal Free Energies = -56.542159 Hartrees  
Number of imaginary frequencies = 0

---

|   |             |             |             |
|---|-------------|-------------|-------------|
| N | -0.74102900 | 0.55902300  | 0.12671100  |
| H | -0.36073800 | -0.38382400 | 0.12662200  |
| H | -0.36070800 | 1.03059900  | 0.94315600  |
| H | -0.36071100 | 1.03053400  | -0.68979900 |

---

Table S3. Optimized structure of acetophenone in cartesian coordinates (M06-2X/6-311++G(d,p)//M06-2X/6-31+G(d,p))

---

Sum of electronic and thermal Free Energies = -384.744721 Hartrees  
Number of imaginary frequencies = 0

---

|   |             |             |             |
|---|-------------|-------------|-------------|
| C | -4.45845800 | 0.22831100  | -0.28459000 |
| C | -3.58957900 | 1.19446500  | -0.79784500 |
| C | -2.22971800 | 1.12603500  | -0.51428800 |
| C | -1.72627000 | 0.09084500  | 0.28451600  |
| C | -2.60120000 | -0.87539900 | 0.79563400  |
| C | -3.96390500 | -0.80497800 | 0.51093500  |
| H | -5.52054600 | 0.28180000  | -0.50550800 |
| H | -3.97441800 | 1.99861000  | -1.41767700 |
| H | -2.22772200 | -1.68442400 | 1.41565400  |
| H | -4.63827900 | -1.55620800 | 0.91036700  |
| C | -0.25780500 | 0.04724900  | 0.57119100  |
| C | 0.28740700  | -1.06639600 | 1.42226900  |
| H | -0.18285700 | -1.05423100 | 2.41070100  |

---

|   |             |             |             |
|---|-------------|-------------|-------------|
| H | 0.06836600  | -2.03606100 | 0.96385800  |
| H | 1.36577700  | -0.94449800 | 1.52711800  |
| O | 0.48450600  | 0.90888700  | 0.11597300  |
| H | -1.54592900 | 1.87165800  | -0.90812900 |

Table S4. Optimized structure of cyanoborohydride in cartesian coordinates (M06-2X/6-311++G(d,p)//M06-2X/6-31+G(d,p))

Sum of electronic and thermal Free Energies = -119.617184 Hartrees  
Number of imaginary frequencies = 0

|   |             |             |             |
|---|-------------|-------------|-------------|
| H | -1.70050100 | 0.58173700  | -0.99835100 |
| H | -1.70045700 | -1.15539700 | -0.00460100 |
| H | -1.70084400 | 0.57379800  | 1.00290000  |
| C | 0.27343100  | 0.00002300  | -0.00008300 |
| N | 1.43781400  | 0.00000400  | 0.00005800  |

Table S5. Optimized structure of ethanol in cartesian coordinates (M06-2X/6-311++G(d,p)//M06-2X/6-31+G(d,p))

Sum of electronic and thermal Free Energies = -154.97405 Hartrees  
Number of imaginary frequencies = 0

|   |             |             |             |
|---|-------------|-------------|-------------|
| C | 1.22227000  | -0.22212200 | 0.00006600  |
| H | 1.29467800  | -0.85663300 | 0.88910300  |
| H | 2.06939700  | 0.47029400  | -0.00001100 |
| H | 1.29472000  | -0.85685000 | -0.88881400 |
| C | -0.08018200 | 0.54734600  | -0.00006300 |
| H | -0.14669600 | 1.18814000  | 0.88827800  |
| H | -0.14653400 | 1.18809500  | -0.88845900 |
| O | -1.15335500 | -0.39621600 | -0.00014100 |
| H | -1.99124900 | 0.08533800  | 0.00100900  |

## 6.2. Optimized Minima Structures for Step i of the Mechanism (Hemiaminal Formation)

Table S6. Optimized structure of the hydroxy-ammonium ion in cartesian coordinates (M06-2X/6-311++G(d,p)//M06-2X/6-31+G(d,p))

Sum of electronic and thermal Free Energies = -441.709049 Hartrees  
Number of imaginary frequencies = 0

|   |             |             |             |
|---|-------------|-------------|-------------|
| C | -4.31421100 | 0.22054600  | -0.14585500 |
| C | -3.52182300 | 1.36604000  | -0.17157800 |
| C | -2.13304600 | 1.26461800  | -0.07658600 |
| C | -1.53060300 | 0.01155800  | 0.04676900  |
| C | -2.32845200 | -1.13825700 | 0.07624600  |
| C | -3.71362000 | -1.03308300 | -0.02291700 |
| H | -5.39454900 | 0.30207400  | -0.21862300 |

|   |             |             |             |
|---|-------------|-------------|-------------|
| H | -3.98133500 | 2.34544400  | -0.26447300 |
| H | -1.87972300 | -2.12379600 | 0.18002200  |
| H | -4.32295300 | -1.93136100 | 0.00097500  |
| C | -0.01804900 | -0.10654900 | 0.17384500  |
| C | 0.42962400  | -0.84143000 | 1.42479500  |
| H | 0.06419800  | -0.29532000 | 2.29707200  |
| H | 0.03408400  | -1.85880400 | 1.45103400  |
| H | 1.52350900  | -0.88635100 | 1.45894500  |
| O | 0.55629100  | 1.15380200  | 0.06499900  |
| N | 0.48957200  | -0.89463900 | -1.03600500 |
| H | 0.09560600  | -1.84139600 | -1.07848300 |
| H | 1.42159000  | 1.16453600  | 0.50185900  |
| H | -1.52168400 | 2.15956400  | -0.09254500 |
| H | 0.24400700  | -0.40258400 | -1.90284000 |
| H | 1.51205300  | -0.98213100 | -0.99672100 |

Table S7. Optimized structure of the hemiaminal in cartesian coordinates (M06-2X/6-311++G(d,p)//M06-2X/6-31+G(d,p))

---

Sum of electronic and thermal Free Energies = -441.268746 Hartrees  
Number of imaginary frequencies = 0

---

|   |             |             |             |
|---|-------------|-------------|-------------|
| C | 2.97266300  | -2.03125800 | -0.03217600 |
| C | 2.64923800  | -1.33055000 | -1.19537300 |
| C | 1.83360200  | -0.20281800 | -1.12853100 |
| C | 1.32927300  | 0.24376200  | 0.09944900  |
| C | 1.65833500  | -0.46164800 | 1.25882500  |
| C | 2.47453800  | -1.59313700 | 1.19314000  |
| H | 3.60625000  | -2.91199500 | -0.08193100 |
| H | 3.02997400  | -1.66398800 | -2.15656100 |
| H | 1.28253000  | -0.13903100 | 2.22447300  |
| H | 2.71812500  | -2.13161000 | 2.10453900  |
| C | 0.48389600  | 1.51522400  | 0.13022900  |
| C | -0.30837600 | 1.70623900  | 1.41767900  |
| H | -0.96085000 | 0.84818600  | 1.59807200  |
| H | 0.35086400  | 1.84838700  | 2.27647700  |
| H | -0.93156500 | 2.60190900  | 1.31703200  |
| O | -0.43963600 | 1.37652300  | -0.96420100 |
| N | 1.37084000  | 2.65212000  | -0.04147900 |
| H | 1.85525700  | 2.58462200  | -0.93474000 |
| H | 0.82969100  | 3.51588500  | -0.04800000 |
| H | 1.58067700  | 0.33345200  | -2.03904400 |
| H | -0.99529300 | 2.16960100  | -0.98970700 |

---

### 6.2.1. Optimized Structures for Pathway a

Table S8. Optimized TSS1 (nucleophilic attack) for pathway a in cartesian coordinates (M06-2X/6-311++G(d,p)//M06-2X/6-31+G(d,p))

| Sum of electronic and thermal Free Energies = -441.250992 Hartrees |             |             |             |
|--------------------------------------------------------------------|-------------|-------------|-------------|
| Number of imaginary frequencies = 1                                |             |             |             |
| C                                                                  | -2.86997600 | 0.14236300  | 0.03633600  |
| C                                                                  | -2.27882300 | -1.11928600 | 0.08154700  |
| C                                                                  | -0.89042200 | -1.24536700 | 0.01028400  |
| C                                                                  | -0.07900400 | -0.11518600 | -0.10861200 |
| C                                                                  | -0.67983600 | 1.14874800  | -0.15673100 |
| C                                                                  | -2.06539100 | 1.27752200  | -0.08217900 |
| H                                                                  | -3.95001700 | 0.24297600  | 0.09192700  |
| H                                                                  | -2.89738400 | -2.00787100 | 0.17024600  |
| H                                                                  | -0.06859300 | 2.04330500  | -0.24230600 |
| H                                                                  | -2.51757600 | 2.26456700  | -0.11619300 |
| C                                                                  | 1.43396900  | -0.30453000 | -0.20811300 |
| C                                                                  | 2.13668200  | 0.59516300  | -1.21537700 |
| H                                                                  | 1.86209700  | 0.24589300  | -2.21718900 |
| H                                                                  | 1.86269200  | 1.64846100  | -1.13002200 |
| H                                                                  | 3.21815100  | 0.48975600  | -1.09578800 |
| O                                                                  | 1.89130400  | -1.47409500 | -0.05174700 |
| N                                                                  | 1.92127200  | 0.64131800  | 1.38421700  |
| H                                                                  | 1.65786400  | 1.62413700  | 1.45157200  |
| H                                                                  | 2.93505200  | 0.56556700  | 1.46375200  |
| H                                                                  | -0.42573800 | -2.22594700 | 0.04198600  |
| H                                                                  | 1.50092700  | 0.13613000  | 2.16354600  |

Table S9. Optimized TSS1 (nucleophilic attack) with ethanol assistance for pathway a in cartesian coordinates (M06-2X/6-311++G(d,p)//M06-2X/6-31+G(d,p))

| Sum of electronic and thermal Free Energies = -751.177268 Hartrees |             |             |             |
|--------------------------------------------------------------------|-------------|-------------|-------------|
| Number of imaginary frequencies = 1                                |             |             |             |
| C                                                                  | -3.21117200 | -1.82087100 | -1.08496000 |
| C                                                                  | -2.20231700 | -1.20401600 | -1.83121600 |
| C                                                                  | -1.03362800 | -0.78341000 | -1.20556600 |
| C                                                                  | -0.85273900 | -0.98589800 | 0.16795100  |
| C                                                                  | -1.85670600 | -1.61309700 | 0.90809500  |
| C                                                                  | -3.03679700 | -2.02329700 | 0.28231400  |
| H                                                                  | -4.12807100 | -2.14180000 | -1.57067800 |
| H                                                                  | -2.33278000 | -1.04657500 | -2.89789200 |
| H                                                                  | -1.73683600 | -1.77057400 | 1.97579200  |
| H                                                                  | -3.81848900 | -2.49901900 | 0.86717100  |
| C                                                                  | 0.38749800  | -0.43237200 | 0.82789800  |



|   |             |             |             |
|---|-------------|-------------|-------------|
| C | 0.66351400  | -0.80424200 | 2.26618600  |
| H | -0.02083200 | -0.22743500 | 2.89999200  |
| H | 0.51929400  | -1.86738600 | 2.46615200  |
| H | 1.68673200  | -0.51577900 | 2.51838100  |
| O | 0.81472500  | 0.67959600  | 0.40613100  |
| N | 1.71065200  | -1.79644400 | 0.02349300  |
| H | 1.56132000  | -2.77351300 | 0.26922500  |
| H | 2.63671200  | -1.50729300 | 0.34125900  |
| H | -0.25266300 | -0.28931300 | -1.77859200 |
| H | 1.67788500  | -1.71148200 | -0.99100400 |
| H | 2.59609000  | 0.78825900  | 0.69341000  |
| H | -0.43131000 | 1.80625100  | -0.31675400 |
| O | 3.55239400  | 0.58944400  | 0.61722200  |
| O | -1.14795900 | 2.43768600  | -0.52587300 |
| C | -2.27705700 | 2.11797500  | 0.28222200  |
| H | -2.76500400 | 1.20576900  | -0.09154800 |
| H | -1.95580300 | 1.92547300  | 1.31560200  |
| C | -3.24721500 | 3.28054200  | 0.24003900  |
| H | -3.56245700 | 3.47708900  | -0.78992700 |
| H | -4.13759700 | 3.05568400  | 0.83495000  |
| H | -2.78197900 | 4.18715500  | 0.63968300  |
| C | 3.92714900  | 0.79446900  | -0.74316900 |
| H | 3.92241800  | 1.86773300  | -0.97606800 |
| H | 3.20065400  | 0.30747400  | -1.40921600 |
| C | 5.30904600  | 0.21489000  | -0.95970000 |
| H | 5.63248400  | 0.37534400  | -1.99248600 |
| H | 6.03398200  | 0.69291000  | -0.29302800 |
| H | 5.31095100  | -0.86170800 | -0.75927500 |

Table S10. Optimized structure of the zwitterionic intermediate for pathway a in cartesian coordinates (M06-2X/6-311++G(d,p)//M06-2X/6-31+G(d,p))

Sum of electronic and thermal Free Energies = -441.249041 Hartrees  
Number of imaginary frequencies = 0

|   |             |             |             |
|---|-------------|-------------|-------------|
| C | 2.87751900  | -0.09168300 | 0.01400600  |
| C | 2.24765300  | 1.15170700  | 0.00543600  |
| C | 0.85374700  | 1.23307800  | -0.02171800 |
| C | 0.07283300  | 0.07666500  | -0.04415400 |
| C | 0.71388500  | -1.16948900 | -0.04286300 |
| C | 2.10497000  | -1.25435300 | -0.00923100 |
| H | 3.96147400  | -0.15681000 | 0.03737800  |
| H | 2.84060200  | 2.06195700  | 0.02030400  |
| H | 0.13259700  | -2.08906800 | -0.06633500 |
| H | 2.58545900  | -2.22860100 | -0.00346600 |
| C | -1.46457100 | 0.21062900  | -0.08806300 |

|   |             |             |             |
|---|-------------|-------------|-------------|
| C | -2.06254700 | -0.59426900 | -1.25116500 |
| H | -1.73450900 | -0.12857300 | -2.18492000 |
| H | -1.75791300 | -1.64512400 | -1.26090800 |
| H | -3.15477400 | -0.53704500 | -1.19953300 |
| O | -1.92926600 | 1.43694900  | 0.02165300  |
| N | -1.94821300 | -0.59007400 | 1.22361700  |
| H | -1.68705300 | -1.57900000 | 1.25937200  |
| H | -2.96811800 | -0.51766300 | 1.26660400  |
| H | 0.35887000  | 2.19896000  | -0.02735000 |
| H | -1.56593800 | -0.11781300 | 2.04682900  |

Table S11. Optimized structure of the zwitterionic intermediate with ethanol assistance for pathway a in cartesian coordinates (M06-2X/6-311++G(d,p)//M06-2X/6-31+G(d,p))

---

Sum of electronic and thermal Free Energies = -751.17863 Hartrees  
Number of imaginary frequencies = 0

---

|   |             |             |             |
|---|-------------|-------------|-------------|
| C | -3.44278400 | -1.55277100 | -0.98360000 |
| C | -2.41397000 | -1.08012400 | -1.80260600 |
| C | -1.15775300 | -0.82074300 | -1.26239800 |
| C | -0.90478800 | -1.03720500 | 0.09806200  |
| C | -1.93487200 | -1.51723700 | 0.90874500  |
| C | -3.19996500 | -1.76958200 | 0.37056800  |
| H | -4.42649400 | -1.74770500 | -1.40069000 |
| H | -2.59468500 | -0.90458600 | -2.85915000 |
| H | -1.76969600 | -1.68818400 | 1.96772200  |
| H | -3.99431200 | -2.13395300 | 1.01557600  |
| C | 0.48029000  | -0.67333100 | 0.64547500  |
| C | 0.64765000  | -0.91984400 | 2.14325200  |
| H | -0.02554900 | -0.25328200 | 2.68859100  |
| H | 0.43894900  | -1.95389900 | 2.43373500  |
| H | 1.67620000  | -0.67143200 | 2.42267700  |
| O | 0.87720400  | 0.55707300  | 0.26270400  |
| N | 1.47114000  | -1.69128200 | -0.03086700 |
| H | 1.26956600  | -2.66775400 | 0.20338000  |
| H | 2.42646100  | -1.45533500 | 0.27280300  |
| H | -0.37002100 | -0.42554500 | -1.89994800 |
| H | 1.43333800  | -1.58289500 | -1.04848400 |
| H | 2.46873500  | 0.63598600  | 0.48204000  |
| H | -0.26351100 | 1.63236200  | -0.21331400 |
| O | 3.45223800  | 0.43387200  | 0.53830400  |
| O | -0.93211800 | 2.33322800  | -0.45160300 |
| C | -2.08473700 | 2.14858700  | 0.35626500  |
| H | -2.67186700 | 1.28997700  | -0.00507600 |
| H | -1.78874600 | 1.93167100  | 1.39343300  |
| C | -2.93145400 | 3.40535000  | 0.30957100  |

|   |             |             |             |
|---|-------------|-------------|-------------|
| H | -3.22685200 | 3.62779300  | -0.72126300 |
| H | -3.83962000 | 3.27944900  | 0.90729900  |
| H | -2.37362800 | 4.26187800  | 0.70162100  |
| C | 4.02433700  | 0.65709900  | -0.74446400 |
| H | 3.98677800  | 1.72649000  | -0.99424500 |
| H | 3.44761100  | 0.11969600  | -1.51311000 |
| C | 5.45978200  | 0.17235100  | -0.73905900 |
| H | 5.92609800  | 0.34156700  | -1.71444800 |
| H | 6.04140600  | 0.70696100  | 0.01891800  |
| H | 5.50286200  | -0.89896500 | -0.51609800 |

Table S12. Optimized TSS for the intramolecular proton transfer in the zwitterionic intermediate for pathway a in cartesian coordinates (M06-2X/6-311++G(d,p)//M06-2X/6-31+G(d,p))

|                                                                    |             |             |             |
|--------------------------------------------------------------------|-------------|-------------|-------------|
| Sum of electronic and thermal Free Energies = -441.221948 Hartrees |             |             |             |
| Number of imaginary frequencies = 1                                |             |             |             |
| C                                                                  | -2.88643900 | -0.04724600 | -0.01720100 |
| C                                                                  | -2.22406100 | 1.17788100  | 0.03764400  |
| C                                                                  | -0.82802200 | 1.22252200  | 0.05051100  |
| C                                                                  | -0.08523600 | 0.04252200  | 0.01292300  |
| C                                                                  | -0.75505200 | -1.18615900 | -0.03680500 |
| C                                                                  | -2.14739700 | -1.23180200 | -0.05692000 |
| H                                                                  | -3.97193400 | -0.08170400 | -0.03024700 |
| H                                                                  | -2.79279900 | 2.10286200  | 0.06829900  |
| H                                                                  | -0.18561300 | -2.11315300 | -0.06537900 |
| H                                                                  | -2.65598400 | -2.19047000 | -0.10278100 |
| C                                                                  | 1.43675200  | 0.09478200  | 0.07124500  |
| C                                                                  | 1.96870500  | -0.51344000 | 1.36408000  |
| H                                                                  | 1.62972100  | 0.10001500  | 2.20366600  |
| H                                                                  | 1.61417600  | -1.53789300 | 1.51104400  |
| H                                                                  | 3.06343400  | -0.50698800 | 1.34641800  |
| O                                                                  | 1.98489100  | 1.34375400  | -0.21131300 |
| N                                                                  | 2.04576800  | -0.61461800 | -1.13395100 |
| H                                                                  | 2.71479200  | -1.35266300 | -0.91330800 |
| H                                                                  | 2.43230500  | 0.53528200  | -1.18580300 |
| H                                                                  | -0.30718000 | 2.17387700  | 0.08616600  |
| H                                                                  | 1.38407400  | -0.93123500 | -1.84277000 |

### 6.2.2. Optimized Structures for Pathway b

Table S13. Optimized protonated ketone for pathway b in cartesian coordinates (M06-2X/6-311++G(d,p)//M06-2X/6-31+G(d,p))

---

Sum of electronic and thermal Free Energies = -385.149764 Hartrees  
Number of imaginary frequencies = 0

---

|   |             |             |             |
|---|-------------|-------------|-------------|
| C | 2.60852800  | 0.07327700  | -0.00075300 |
| C | 1.96397300  | -1.16730900 | 0.03441200  |
| C | 0.57957000  | -1.22593800 | 0.03209200  |
| C | -0.16808400 | -0.03125000 | 0.00269300  |
| C | 0.48637200  | 1.21484700  | -0.02752900 |
| C | 1.87322100  | 1.26035500  | -0.03368700 |
| H | 3.69376100  | 0.11404300  | -0.00185300 |
| H | 2.54507100  | -2.08282600 | 0.06291200  |
| H | -0.08176100 | 2.13875100  | -0.05562400 |
| H | 2.38286300  | 2.21730900  | -0.06353600 |
| C | -1.61081200 | -0.08716900 | -0.00117100 |
| C | -2.47672200 | 1.10921500  | 0.06165900  |
| H | -2.20499400 | 1.70838100  | 0.93576600  |
| H | -2.29425400 | 1.72043200  | -0.82953700 |
| H | -3.53112500 | 0.83456300  | 0.10748400  |
| O | -2.12673100 | -1.25968400 | -0.06929500 |
| H | 0.07196100  | -2.18407600 | 0.06052600  |
| H | -3.10394900 | -1.26526800 | -0.06807200 |

---

### 6.2.3. Optimized Structures for Pathway c

Table S14. Optimized TSS1 for pathway c without ethanol assistance in cartesian coordinates (M06-2X/6-311++G(d,p)//M06-2X/6-31+G(d,p))

---

Sum of electronic and thermal Free Energies = -670.294804 Hartrees  
Number of imaginary frequencies = 1

---

|   |             |             |             |
|---|-------------|-------------|-------------|
| C | -4.44460900 | 0.39153000  | 0.00320200  |
| C | -3.55388200 | 1.46049200  | -0.12110100 |
| C | -2.18326600 | 1.24051700  | -0.02209400 |
| C | -1.68662700 | -0.05056300 | 0.19188900  |
| C | -2.58088100 | -1.11759000 | 0.31580100  |
| C | -3.95579200 | -0.89476800 | 0.22471500  |
| H | -5.51458600 | 0.56276100  | -0.07043000 |
| H | -3.92925600 | 2.46513400  | -0.29230800 |
| H | -2.21918400 | -2.12573900 | 0.49105400  |
| H | -4.64345500 | -1.72879700 | 0.32860500  |
| C | -0.19767700 | -0.24362000 | 0.31123600  |
| C | 0.33798000  | -1.61919400 | 0.62145200  |

---

|   |             |             |             |
|---|-------------|-------------|-------------|
| H | 0.14427500  | -1.82301700 | 1.68170200  |
| H | -0.12942600 | -2.39973300 | 0.02134300  |
| H | 1.41737900  | -1.63519100 | 0.45645400  |
| O | 0.49187800  | 0.76393200  | 0.61779700  |
| N | 0.15819200  | -0.38901300 | -1.79172600 |
| H | -0.20931600 | -1.17966400 | -2.31678700 |
| H | 1.17728600  | -0.38782500 | -1.84481600 |
| H | 1.94534000  | 0.62672800  | 0.82076100  |
| O | 2.96564500  | 0.60172500  | 1.02314900  |
| C | 3.66194400  | 0.20837000  | -0.02445100 |
| C | 5.14068200  | 0.14914400  | 0.22436800  |
| H | 5.49405200  | 1.13103500  | 0.55084700  |
| H | 5.34105200  | -0.56179300 | 1.03111000  |
| H | 5.66508000  | -0.15646000 | -0.68010000 |
| O | 3.14275800  | -0.08408200 | -1.09789100 |
| H | -1.48675600 | 2.06857800  | -0.11349200 |
| H | -0.18930300 | 0.46856600  | -2.21640500 |

Table S15. Optimized TSS1 for pathway c with ethanol assistance in cartesian coordinates (M06-2X/6-311++G(d,p)//M06-2X/6-31+G(d,p))

Sum of electronic and thermal Free Energies = -825.256291 Hartrees  
Number of imaginary frequencies = 1

|   |             |             |             |
|---|-------------|-------------|-------------|
| C | -3.94186900 | -1.40117600 | -0.33164900 |
| C | -3.09726900 | -1.05776900 | -1.39176900 |
| C | -1.74598800 | -0.82929200 | -1.15725300 |
| C | -1.22283400 | -0.95471600 | 0.13544100  |
| C | -2.06564500 | -1.30969800 | 1.19086000  |
| C | -3.42532000 | -1.52568100 | 0.95643500  |
| H | -4.99907400 | -1.57188800 | -0.51260400 |
| H | -3.49576700 | -0.96413900 | -2.39759000 |
| H | -1.67716800 | -1.40156400 | 2.20061300  |
| H | -4.07842700 | -1.78875800 | 1.78308500  |
| C | 0.21861600  | -0.61039400 | 0.37098700  |
| C | 0.84202800  | -0.90895500 | 1.70787700  |
| H | 0.50951200  | -0.13596500 | 2.41202500  |
| H | 0.55203200  | -1.88690700 | 2.09294300  |
| H | 1.92933100  | -0.85389700 | 1.62387500  |
| O | 0.71860600  | 0.28831600  | -0.35459700 |
| N | 1.03267200  | -2.41162700 | -0.57330700 |
| H | 0.88896200  | -3.32502000 | -0.14844300 |
| H | 2.03123700  | -2.20421900 | -0.59517100 |
| H | -1.08574300 | -0.55229800 | -1.97492800 |
| H | 0.69112400  | -2.44915900 | -1.53138600 |
| H | 2.15470900  | 0.74086300  | -0.12218100 |

|   |             |             |             |
|---|-------------|-------------|-------------|
| H | -0.48781700 | 1.66491900  | -0.90671200 |
| O | 3.09687400  | 1.12411500  | 0.01424600  |
| O | -1.10395300 | 2.41852100  | -0.92460700 |
| C | -1.91724800 | 2.36504700  | 0.24559500  |
| H | -2.67878400 | 1.57869000  | 0.14072100  |
| H | -1.29915900 | 2.11885000  | 1.12015000  |
| C | -2.58188700 | 3.71305500  | 0.43186100  |
| H | -3.18996800 | 3.96315800  | -0.44356200 |
| H | -3.23431400 | 3.69697700  | 1.31008900  |
| H | -1.83194800 | 4.49821600  | 0.56991800  |
| C | 4.02467300  | 0.19618600  | -0.13874300 |
| C | 5.41995800  | 0.70903000  | 0.05935600  |
| H | 6.14208500  | -0.09098800 | -0.09785100 |
| H | 5.60820200  | 1.52916700  | -0.63882200 |
| H | 5.51629700  | 1.10632000  | 1.07384600  |
| O | 3.75880800  | -0.96905200 | -0.41239800 |

#### 6.2.4. Optimized Structures for Pathway d

Table S16. Optimized TSS1 for pathway d in cartesian coordinates (M06-2X/6-311++G(d,p)//M06-2X/6-31+G(d,p))

|                                                                    |             |             |             |
|--------------------------------------------------------------------|-------------|-------------|-------------|
| Sum of electronic and thermal Free Energies = -441.221871 Hartrees |             |             |             |
| Number of imaginary frequencies = 1                                |             |             |             |
| N                                                                  | 2.04881400  | -0.67520200 | 1.09676000  |
| O                                                                  | 1.98391800  | 1.33066500  | 0.28312800  |
| C                                                                  | 1.43621600  | 0.09839000  | -0.06572000 |
| C                                                                  | -0.08515900 | 0.04262200  | -0.00907200 |
| H                                                                  | 2.71229300  | -1.40479700 | 0.83533700  |
| H                                                                  | 2.43875800  | 0.46896400  | 1.20790100  |
| C                                                                  | -0.75437600 | -1.18660900 | 0.02420200  |
| C                                                                  | -2.14691100 | -1.23290600 | 0.04290500  |
| C                                                                  | -2.88624400 | -0.04835400 | 0.01634700  |
| C                                                                  | -2.22421800 | 1.17765600  | -0.02518000 |
| C                                                                  | -0.82835800 | 1.22286900  | -0.03556700 |
| H                                                                  | -0.18487000 | -2.11394800 | 0.04170000  |
| H                                                                  | -2.65515300 | -2.19220100 | 0.07807100  |
| H                                                                  | -3.97172000 | -0.08324900 | 0.02918300  |
| C                                                                  | 1.96613400  | -0.43766200 | -1.39094900 |
| H                                                                  | 1.61063700  | -1.45260600 | -1.59252800 |
| H                                                                  | 1.62536600  | 0.22051500  | -2.19519900 |
| H                                                                  | 3.06091700  | -0.43243000 | -1.37501700 |
| H                                                                  | 1.38974600  | -1.02296400 | 1.79327100  |
| H                                                                  | -0.30826000 | 2.17507100  | -0.06015500 |

|   |             |             |             |
|---|-------------|-------------|-------------|
| H | -2.79325500 | 2.10270400  | -0.04670400 |
| N | 2.04881400  | -0.67520200 | 1.09676000  |
| O | 1.98391800  | 1.33066500  | 0.28312800  |

### 6.2.5. Optimized Structures for Pathway e

Table S17. Optimized TSS1 for pathway e in cartesian coordinates (M06-2X/6-311++G(d,p)//M06-2X/6-31+G(d,p))

Sum of electronic and thermal Free Energies = -596.208372 Hartrees

Number of imaginary frequencies = 1

|   |             |             |             |
|---|-------------|-------------|-------------|
| N | 0.81010700  | 0.87335300  | -0.68665700 |
| O | 2.94147400  | 0.00992800  | 0.51527900  |
| O | 0.70728700  | -0.79044300 | 0.93408100  |
| C | 0.04193500  | 0.34699300  | 0.53274600  |
| C | -1.39237200 | 0.04949000  | 0.11610700  |
| H | 0.58400900  | 1.84322100  | -0.91870800 |
| H | 1.84523300  | 0.76156800  | -0.39318300 |
| H | 1.80075900  | -0.52719500 | 0.86506100  |
| C | -2.15867100 | 1.02612200  | -0.53021900 |
| C | -3.47855200 | 0.76342800  | -0.89020600 |
| C | -4.04942600 | -0.47686300 | -0.59840400 |
| C | -3.29116000 | -1.44971500 | 0.05049000  |
| C | -1.96597400 | -1.18902800 | 0.40516100  |
| H | -1.72781300 | 1.99880500  | -0.75819200 |
| H | -4.06142500 | 1.52753900  | -1.39604700 |
| H | -5.07930300 | -0.68152500 | -0.87573600 |
| C | 0.10471300  | 1.45139200  | 1.58756100  |
| H | -0.38814000 | 2.36760000  | 1.24935200  |
| H | -0.39879600 | 1.09243900  | 2.48865400  |
| H | 1.14968900  | 1.67038600  | 1.83039900  |
| H | 0.63106900  | 0.28716000  | -1.50652400 |
| H | -1.37227000 | -1.94585300 | 0.90640600  |
| H | -3.72873600 | -2.41670100 | 0.28123900  |
| C | 3.66457200  | -0.86848900 | -0.31518600 |
| H | 2.99544800  | -1.33554200 | -1.06244500 |
| H | 4.09003200  | -1.69515200 | 0.27688500  |
| C | 4.78843600  | -0.14430800 | -1.04179700 |
| H | 5.48058400  | 0.30449500  | -0.32099500 |
| H | 4.38388000  | 0.65674800  | -1.67105300 |
| H | 5.35393800  | -0.83147300 | -1.68091300 |

### 6.3. Optimized Structures for Step ii (Dehydration) and iii (Reduction) of the Mechanism

Table S18. Optimized TSS2 (lowest energy) in cartesian coordinates  
(M06-2X/6-311++G(d,p)//M06-2X/6-31+G(d,p))

| Sum of electronic and thermal Free Energies = -670.28654 Hartrees |             |             |             |
|-------------------------------------------------------------------|-------------|-------------|-------------|
| Number of imaginary frequencies = 1                               |             |             |             |
| C                                                                 | -4.42639000 | -0.31812800 | -0.22272600 |
| C                                                                 | -3.57216400 | -1.39565600 | 0.02369800  |
| C                                                                 | -2.21116300 | -1.17746100 | 0.21120000  |
| C                                                                 | -1.69210200 | 0.12198400  | 0.15343600  |
| C                                                                 | -2.54610400 | 1.19669400  | -0.10327500 |
| C                                                                 | -3.91193600 | 0.97479500  | -0.28598400 |
| H                                                                 | -5.48867300 | -0.48932900 | -0.36944000 |
| H                                                                 | -3.96604200 | -2.40662400 | 0.06302500  |
| H                                                                 | -2.15882700 | 2.20931300  | -0.15300300 |
| H                                                                 | -4.57064500 | 1.81601300  | -0.47884700 |
| C                                                                 | -0.23112500 | 0.35113200  | 0.39062000  |
| C                                                                 | 0.36501300  | 1.69030800  | 0.05534100  |
| H                                                                 | 0.08811300  | 2.00993900  | -0.94989200 |
| H                                                                 | -0.00670200 | 2.42254500  | 0.77920000  |
| H                                                                 | 1.45290100  | 1.64166200  | 0.14046300  |
| O                                                                 | 0.43344000  | -0.63006500 | -1.06845000 |
| N                                                                 | 0.29838900  | -0.26610800 | 1.44964300  |
| H                                                                 | -0.14273200 | -1.10711200 | 1.80191900  |
| H                                                                 | 1.31160800  | -0.18430300 | 1.57677400  |
| H                                                                 | 0.12107400  | -0.26102100 | -1.91036500 |
| O                                                                 | 2.89587900  | -0.35204800 | -1.08620400 |
| C                                                                 | 3.61441500  | -0.16947500 | -0.04346400 |
| C                                                                 | 5.10510500  | -0.05120400 | -0.28520800 |
| H                                                                 | 5.29594900  | 0.78797200  | -0.96072300 |
| H                                                                 | 5.64707200  | 0.09904000  | 0.64891900  |
| H                                                                 | 5.46509500  | -0.95885700 | -0.77838900 |
| O                                                                 | 3.16566000  | -0.08359300 | 1.12232900  |
| H                                                                 | -1.54781700 | -2.02218900 | 0.37893800  |
| H                                                                 | 1.48976800  | -0.50656700 | -1.03929800 |

Table S19. Optimized TSS2 (highest energy) in cartesian coordinates  
(M06-2X/6-311++G(d,p)//M06-2X/6-31+G(d,p))

| Sum of electronic and thermal Free Energies = -670.285018 Hartrees |             |            |             |
|--------------------------------------------------------------------|-------------|------------|-------------|
| Number of imaginary frequencies = 1                                |             |            |             |
| C                                                                  | 1.19937200  | 2.61272300 | 0.18787500  |
| C                                                                  | 0.31014400  | 2.53330900 | -0.88589600 |
| C                                                                  | -0.71999400 | 1.59838500 | -0.87096100 |
| C                                                                  | -0.86950000 | 0.73389300 | 0.22034700  |



|   |             |             |             |
|---|-------------|-------------|-------------|
| C | 0.01959200  | 0.81616700  | 1.29380400  |
| C | 1.05067600  | 1.75578800  | 1.27645000  |
| H | 2.00831400  | 3.33718300  | 0.17146100  |
| H | 0.42669600  | 3.19166900  | -1.74127600 |
| H | -0.07824100 | 0.14805200  | 2.14310700  |
| H | 1.73997600  | 1.81030500  | 2.11376900  |
| C | -1.95340000 | -0.29932700 | 0.21864900  |
| C | -1.95809600 | -1.36818800 | 1.27423000  |
| H | -0.97720200 | -1.83570400 | 1.36348100  |
| H | -2.23289300 | -0.90822700 | 2.22897500  |
| H | -2.70697900 | -2.12549200 | 1.02892100  |
| O | -1.24492800 | -1.32216600 | -1.21499100 |
| N | -3.15522100 | 0.10406900  | -0.19236600 |
| H | -3.25745000 | 0.90528600  | -0.80222500 |
| H | -3.93653400 | -0.53943600 | -0.15294000 |
| H | -0.17061200 | -1.29589500 | -1.23993800 |
| H | -1.38090400 | 1.51965200  | -1.73056800 |
| H | -1.51416000 | -2.24750900 | -1.10293700 |
| O | 1.20595600  | -1.10495800 | -1.31335500 |
| C | 1.82928400  | -1.42824800 | -0.23945900 |
| O | 1.35410400  | -2.17002900 | 0.64573000  |
| C | 3.23693100  | -0.88724400 | -0.08945800 |
| H | 3.92882100  | -1.59161200 | -0.56494400 |
| H | 3.34076200  | 0.07961300  | -0.58617100 |
| H | 3.50584600  | -0.80268300 | 0.96529200  |

Table S20. Optimized structure of iminium in cartesian coordinates  
(M06-2X/6-311++G(d,p)//M06-2X/6-31+G(d,p))

Sum of electronic and thermal Free Energies = -365.29033 Hartrees

Number of imaginary frequencies = 0

|   |             |             |             |
|---|-------------|-------------|-------------|
| C | -4.34049300 | -1.16237200 | 0.28114600  |
| C | -3.91166700 | -0.35323800 | 1.33263400  |
| C | -2.60934700 | 0.13440800  | 1.34846000  |
| C | -1.71907200 | -0.20202000 | 0.31715900  |
| C | -2.15951600 | -1.01321500 | -0.74264300 |
| C | -3.46530600 | -1.48646500 | -0.75783400 |
| H | -5.36000100 | -1.53555000 | 0.26552700  |
| H | -4.59076700 | -0.09816000 | 2.13951800  |
| H | -1.50684100 | -1.25635900 | -1.57606200 |
| H | -3.80389500 | -2.10232300 | -1.58456700 |
| C | -0.34528600 | 0.31519700  | 0.36553000  |
| C | 0.01609300  | 1.45834100  | 1.24726200  |
| H | -0.69671600 | 2.27495600  | 1.11328800  |
| H | -0.04284200 | 1.12857100  | 2.29023100  |

|   |             |             |             |
|---|-------------|-------------|-------------|
| H | 1.02893200  | 1.80837800  | 1.04529600  |
| H | -2.28592000 | 0.76245300  | 2.17170600  |
| N | 0.58592900  | -0.22401600 | -0.35346700 |
| H | 0.42447200  | -1.03830000 | -0.94085600 |
| H | 1.53163000  | 0.15120700  | -0.34154100 |

Table S21. Optimized TSS3 in cartesian coordinates (M06-2X/6-311++G(d,p)//M06-2X/6-31+G(d,p))

Sum of electronic and thermal Free Energies = -484.880073 Hartrees  
Number of imaginary frequencies = 1

|   |             |             |             |
|---|-------------|-------------|-------------|
| C | -3.48116000 | 0.35562500  | -0.41055300 |
| C | -2.64261300 | 1.37281200  | 0.05265800  |
| C | -1.30610900 | 1.10461200  | 0.32597300  |
| C | -0.79328800 | -0.18403100 | 0.13702400  |
| C | -1.63458700 | -1.20236000 | -0.32104300 |
| C | -2.97547000 | -0.92879200 | -0.59500700 |
| H | -4.52448500 | 0.56658400  | -0.62521700 |
| H | -3.02960200 | 2.37711900  | 0.19484000  |
| H | -1.25706300 | -2.21289900 | -0.44383900 |
| H | -3.62260900 | -1.72598200 | -0.94781300 |
| C | 0.63279500  | -0.49074900 | 0.49479000  |
| C | 1.07664900  | -0.22264100 | 1.91031300  |
| H | 0.76236500  | 0.76825600  | 2.23839500  |
| H | 0.60575600  | -0.97473100 | 2.55288700  |
| H | 2.16349500  | -0.30979100 | 1.99219600  |
| H | -0.64971100 | 1.90117500  | 0.66795800  |
| H | 1.19762300  | 0.73475100  | -0.10113800 |
| N | 1.18837500  | -1.55458300 | -0.09198900 |
| H | 0.91462100  | -1.82061800 | -1.03131300 |
| H | 2.10366600  | -1.86588800 | 0.21363700  |
| H | 1.64856900  | 1.92965300  | -1.59885500 |
| H | 2.22450200  | 2.38584700  | 0.31474400  |
| C | 3.33003300  | 0.60031600  | -0.69135200 |
| N | 4.21015100  | -0.15341000 | -0.78327700 |
| B | 2.08713900  | 1.55474400  | -0.54328500 |

#### 6.4. Optimized Products

Table S22. Optimized structure of ethyl-phenyl-amine in cartesian coordinates (M06-2X/6-311++G(d,p)//M06-2X/6-31+G(d,p))

Sum of electronic and thermal Free Energies = -366.03688 Hartrees  
Number of imaginary frequencies = 0

|   |             |            |             |
|---|-------------|------------|-------------|
| C | -3.55971600 | 0.21696200 | -0.15033300 |
|---|-------------|------------|-------------|

|   |             |             |             |
|---|-------------|-------------|-------------|
| C | -2.72525400 | 1.33033200  | -0.05776200 |
| C | -1.34772000 | 1.16080200  | 0.09335500  |
| C | -0.78592000 | -0.11762100 | 0.15765600  |
| C | -1.63159100 | -1.22959800 | 0.06461900  |
| C | -3.00755300 | -1.06426700 | -0.08937900 |
| H | -4.63142600 | 0.34509400  | -0.27221700 |
| H | -3.14393300 | 2.33153600  | -0.10858400 |
| H | -1.20553900 | -2.22809200 | 0.10913300  |
| H | -3.65085300 | -1.93689800 | -0.16170300 |
| C | 0.70586000  | -0.28532600 | 0.37775600  |
| C | 1.00125700  | -0.62714900 | 1.83783700  |
| H | 0.63089300  | 0.15935600  | 2.50215800  |
| H | 0.51881900  | -1.57201800 | 2.11095100  |
| H | 2.08077900  | -0.72998900 | 1.99469200  |
| H | -0.69943100 | 2.03206200  | 0.15933900  |
| N | 1.23283100  | -1.35913200 | -0.47377300 |
| H | 1.11855700  | -1.11004500 | -1.45439400 |
| H | 2.23423200  | -1.44843700 | -0.31353600 |
| H | 1.17836800  | 0.68315700  | 0.15463600  |

Table S23. Optimized structure of cyano-borane in cartesian coordinates  
(M06-2X/6-311++G(d,p)//M06-2X/6-31+G(d,p))

|                                                                   |             |             |            |
|-------------------------------------------------------------------|-------------|-------------|------------|
| Sum of electronic and thermal Free Energies = -118.85711 Hartrees |             |             |            |
| Number of imaginary frequencies = 0                               |             |             |            |
| B                                                                 | -4.05753100 | 0.28344700  | 0.00000000 |
| H                                                                 | -4.61400100 | 1.32654500  | 0.00000000 |
| H                                                                 | -4.61400100 | -0.75965100 | 0.00000000 |
| C                                                                 | -2.50738700 | 0.28344700  | 0.00000000 |
| N                                                                 | -1.34864500 | 0.28344700  | 0.00000000 |

Table S24. Optimized structure of acetate in cartesian coordinates  
(M06-2X/6-311++G(d,p)//M06-2X/6-31+G(d,p))

|                                                                    |             |             |             |
|--------------------------------------------------------------------|-------------|-------------|-------------|
| Sum of electronic and thermal Free Energies = -228.595125 Hartrees |             |             |             |
| Number of imaginary frequencies = 0                                |             |             |             |
| O                                                                  | -3.57060000 | 0.19449800  | -1.34338600 |
| C                                                                  | -4.41114100 | 0.38447700  | -0.42001200 |
| O                                                                  | -4.41102400 | 1.37511200  | 0.36460100  |
| C                                                                  | -5.53580300 | -0.63401500 | -0.26135600 |
| H                                                                  | -5.80740700 | -0.75302800 | 0.79016900  |
| H                                                                  | -6.41693900 | -0.25864200 | -0.79400000 |
| H                                                                  | -5.26235700 | -1.60061500 | -0.68905500 |

Table S25. Optimized structure of water in cartesian coordinates  
(M06-2X/6-311++G(d,p)//M06-2X/6-31+G(d,p))

| Sum of electronic and thermal Free Energies = -76.435605 Hartrees |             |            |             |
|-------------------------------------------------------------------|-------------|------------|-------------|
| Number of imaginary frequencies = 0                               |             |            |             |
| O                                                                 | -4.34004600 | 0.18975900 | -1.10680300 |
| H                                                                 | -3.37497700 | 0.22781800 | -1.10680300 |
| H                                                                 | -4.62627500 | 1.11213100 | -1.10680300 |

## 6.5. Optimized Ion Pair Conformers

Table S26. Optimized structure of hydroxy-ammonium ion/acetate ion pair with lower energy in cartesian coordinates (M06-2X/6-311++G(d,p)//M06-2X/6-31+G(d,p))

| Sum of electronic and thermal Free Energies = -670.150309 Hartrees |             |             |             |
|--------------------------------------------------------------------|-------------|-------------|-------------|
| Number of imaginary frequencies = 0                                |             |             |             |
| C                                                                  | -4.45063800 | -0.14092300 | 0.15115000  |
| C                                                                  | -3.68645000 | -1.30142100 | 0.25344500  |
| C                                                                  | -2.29525600 | -1.24085300 | 0.15118300  |
| C                                                                  | -1.65928000 | -0.01593500 | -0.05673400 |
| C                                                                  | -2.43056700 | 1.14751100  | -0.16276100 |
| C                                                                  | -3.81807100 | 1.08589300  | -0.05663700 |
| H                                                                  | -5.53253600 | -0.18975400 | 0.23137100  |
| H                                                                  | -4.17059500 | -2.26030900 | 0.41378900  |
| H                                                                  | -1.95473400 | 2.11162900  | -0.32966600 |
| H                                                                  | -4.40451900 | 1.99610300  | -0.13908300 |
| C                                                                  | -0.14270000 | 0.05838900  | -0.18185500 |
| C                                                                  | 0.30257200  | 0.65926500  | -1.51121600 |
| H                                                                  | -0.06031900 | 0.01900500  | -2.31876700 |
| H                                                                  | -0.09870900 | 1.66616600  | -1.65058500 |
| H                                                                  | 1.39526200  | 0.70258300  | -1.55415300 |
| O                                                                  | 0.41089100  | -1.19186900 | 0.04046000  |
| N                                                                  | 0.39194900  | 0.95609600  | 0.92191400  |
| H                                                                  | 0.05848400  | 1.92076300  | 0.83981100  |
| H                                                                  | 1.47086100  | 0.94610200  | 0.86576500  |
| H                                                                  | 1.41103100  | -1.15560800 | -0.12257700 |
| O                                                                  | 2.96770700  | -1.10133600 | -0.30592600 |
| C                                                                  | 3.59163300  | -0.09188500 | 0.13377300  |
| C                                                                  | 5.09525900  | -0.07696800 | -0.03296000 |
| H                                                                  | 5.51763600  | -0.99868500 | 0.37598300  |
| H                                                                  | 5.33134700  | -0.05115900 | -1.10133600 |
| H                                                                  | 5.54264000  | 0.78752300  | 0.45825400  |
| O                                                                  | 3.03580500  | 0.90174900  | 0.68902500  |
| H                                                                  | -1.70391000 | -2.14602200 | 0.23119300  |
| H                                                                  | 0.10017700  | 0.59218300  | 1.83380200  |

Table S27. Optimized structure of hydroxy-ammonium ion/acetate ion pair with higher energy in cartesian coordinates (M06-2X/6-311++G(d,p)//M06-2X/6-31+G(d,p))

| Sum of electronic and thermal Free Energies = -670.147195 Hartrees |             |             |             |
|--------------------------------------------------------------------|-------------|-------------|-------------|
| Number of imaginary frequencies = 0                                |             |             |             |
| C                                                                  | 4.31890500  | -0.73062800 | -0.19757300 |
| C                                                                  | 3.30690700  | -1.64745600 | 0.09256000  |
| C                                                                  | 1.99355600  | -1.21179300 | 0.24850200  |
| C                                                                  | 1.67780400  | 0.14619800  | 0.11988900  |
| C                                                                  | 2.69193500  | 1.05955000  | -0.17305700 |
| C                                                                  | 4.00824400  | 0.62088600  | -0.33005800 |
| H                                                                  | 5.34366400  | -1.06941800 | -0.31778400 |
| H                                                                  | 3.54028600  | -2.70268400 | 0.19893900  |
| H                                                                  | 2.47178500  | 2.11699600  | -0.27662500 |
| H                                                                  | 4.78961100  | 1.34109800  | -0.55336600 |
| C                                                                  | 0.22435400  | 0.57812500  | 0.26461800  |
| C                                                                  | 0.01375900  | 2.07030700  | 0.45898300  |
| H                                                                  | 0.57020800  | 2.40639300  | 1.33662200  |
| H                                                                  | 0.33944700  | 2.63915000  | -0.41508000 |
| H                                                                  | -1.05214100 | 2.26175700  | 0.61694200  |
| O                                                                  | -0.32883600 | -0.16540200 | 1.31973300  |
| N                                                                  | -0.52299700 | 0.17441200  | -0.98051400 |
| H                                                                  | -0.15132900 | 0.65915600  | -1.80202700 |
| H                                                                  | -1.61602600 | 0.40395100  | -0.85121200 |
| H                                                                  | -1.22619700 | 0.15307000  | 1.50856500  |
| O                                                                  | -3.00194400 | 0.69859300  | -0.54748100 |
| C                                                                  | -3.61313300 | -0.38263200 | -0.21856800 |
| C                                                                  | -5.06029900 | -0.22659600 | 0.20087200  |
| H                                                                  | -5.10995200 | 0.40866800  | 1.09060600  |
| H                                                                  | -5.61936100 | 0.27606100  | -0.59356700 |
| H                                                                  | -5.51498100 | -1.19383200 | 0.41740900  |
| O                                                                  | -3.07655000 | -1.51007100 | -0.22634900 |
| H                                                                  | 1.20977300  | -1.92870100 | 0.47715300  |
| H                                                                  | -0.42736800 | -0.83327400 | -1.13721000 |

Table S28. Optimized structure of iminium/acetate ion pair with lower energy in cartesian coordinates (M06-2X/6-311++G(d,p)//M06-2X/6-31+G(d,p))

| Sum of electronic and thermal Free Energies = -593.751923 Hartrees |             |             |             |
|--------------------------------------------------------------------|-------------|-------------|-------------|
| Number of imaginary frequencies = 0                                |             |             |             |
| C                                                                  | -4.36987600 | -0.78972900 | 0.03653000  |
| C                                                                  | -3.31264900 | -1.66347400 | -0.22408200 |
| C                                                                  | -2.00630900 | -1.18811200 | -0.25211900 |
| C                                                                  | -1.74727300 | 0.17166800  | -0.02253200 |
| C                                                                  | -2.81451700 | 1.04794700  | 0.21713000  |

|   |             |             |             |
|---|-------------|-------------|-------------|
| C | -4.11941900 | 0.56439700  | 0.25613200  |
| H | -5.38892300 | -1.16395800 | 0.06018600  |
| H | -3.50652300 | -2.71445100 | -0.41337500 |
| H | -2.63035100 | 2.10331700  | 0.38939000  |
| H | -4.93978800 | 1.24653300  | 0.45533000  |
| C | -0.36393800 | 0.69120600  | -0.04119400 |
| C | -0.10691100 | 2.13679600  | -0.30925700 |
| H | -0.65703700 | 2.45932700  | -1.19660500 |
| H | -0.46593600 | 2.72737800  | 0.54033200  |
| H | 0.95953300  | 2.32311000  | -0.43981600 |
| N | 0.64117100  | -0.08174100 | 0.17715300  |
| H | 0.48404600  | -1.06094700 | 0.40748000  |
| H | 1.69208200  | 0.26381100  | 0.12144600  |
| H | -1.19817500 | -1.87585100 | -0.48458400 |
| O | 3.41181300  | -1.52064800 | 0.19639900  |
| C | 3.84497700  | -0.35551600 | 0.06180700  |
| O | 3.09372400  | 0.68332600  | 0.02717700  |
| C | 5.33365500  | -0.10729200 | -0.07652300 |
| H | 5.66233000  | 0.58646300  | 0.70269700  |
| H | 5.89843600  | -1.03734600 | -0.00338200 |
| H | 5.53136700  | 0.36603500  | -1.04313100 |

Table S29. Optimized structure of iminium/acetate ion pair with higher energy in cartesian coordinates (M06-2X/6-311++G(d,p)//M06-2X/6-31+G(d,p))

Sum of electronic and thermal Free Energies = -593.751018 Hartrees  
Number of imaginary frequencies = 0

|   |             |             |             |
|---|-------------|-------------|-------------|
| C | -3.15840700 | -1.91541500 | -0.06974900 |
| C | -1.87714400 | -2.02652300 | 0.47315900  |
| C | -1.05027100 | -0.91086000 | 0.54677700  |
| C | -1.50440600 | 0.33126900  | 0.07690400  |
| C | -2.79981600 | 0.44136100  | -0.44798000 |
| C | -3.61835700 | -0.68137300 | -0.52898900 |
| H | -3.80061000 | -2.78923400 | -0.12706000 |
| H | -1.52298800 | -2.98259100 | 0.84540900  |
| H | -3.16791500 | 1.39653600  | -0.80741700 |
| H | -4.61572800 | -0.59083700 | -0.94737600 |
| C | -0.64021200 | 1.52604000  | 0.14282700  |
| C | -1.24345500 | 2.89041000  | 0.10146000  |
| H | -1.65647600 | 3.06921500  | -0.89709600 |
| H | -2.06332200 | 2.96426600  | 0.82003100  |
| H | -0.49243800 | 3.65270800  | 0.31149100  |
| N | 0.63828800  | 1.39375400  | 0.22854700  |
| H | 1.20567000  | 0.45426800  | 0.16331200  |
| H | 1.20120500  | 2.24010000  | 0.29540200  |

|   |             |             |             |
|---|-------------|-------------|-------------|
| H | -0.06303800 | -1.00651500 | 0.98748800  |
| O | 2.10402700  | -0.73036400 | 0.01964100  |
| C | 3.31190900  | -0.32145400 | -0.10833100 |
| O | 3.64375300  | 0.88418500  | -0.07997000 |
| C | 4.36320300  | -1.39569200 | -0.30368700 |
| H | 4.33550400  | -2.08955200 | 0.54171400  |
| H | 4.13101400  | -1.96851100 | -1.20654300 |
| H | 5.36059900  | -0.96327900 | -0.39090000 |

## 7. OPTIMIZED GEOMETRIES FOR THE 4-NITROACETOPHENONE'S AMINATION

Table S30. Optimized structure of 4-nitroacetophenone in cartesian coordinates (M06-2X/6-311++G(d,p)//M06-2X/6-31+G(d,p))

|                                                                    |             |             |             |
|--------------------------------------------------------------------|-------------|-------------|-------------|
| Sum of electronic and thermal Free Energies = -589.237071 Hartrees |             |             |             |
| Number of imaginary frequencies = 0                                |             |             |             |
| C                                                                  | 1.41076600  | 0.00407800  | -0.00007900 |
| C                                                                  | 0.78397100  | -1.23818900 | 0.00029700  |
| C                                                                  | -0.60378700 | -1.26669100 | 0.00016100  |
| C                                                                  | -1.33824700 | -0.07497400 | -0.00024800 |
| C                                                                  | -0.67553200 | 1.15704400  | -0.00061300 |
| C                                                                  | 0.71469400  | 1.20592000  | -0.00058200 |
| H                                                                  | 1.36645200  | -2.15168600 | 0.00067800  |
| H                                                                  | -1.23148900 | 2.08808400  | -0.00098300 |
| H                                                                  | 1.24298800  | 2.15160200  | -0.00087600 |
| C                                                                  | -2.84171200 | -0.15690700 | -0.00018500 |
| C                                                                  | -3.63858100 | 1.11488300  | 0.00177900  |
| H                                                                  | -4.70156300 | 0.87347900  | 0.00234200  |
| H                                                                  | -3.39421100 | 1.71248600  | 0.88598600  |
| H                                                                  | -3.39566200 | 1.71423300  | -0.88165300 |
| O                                                                  | -3.38486800 | -1.25099300 | -0.00162300 |
| H                                                                  | -1.12690400 | -2.21679900 | 0.00044000  |
| N                                                                  | 2.87963800  | 0.04757000  | 0.00011400  |
| O                                                                  | 3.42427800  | 1.13967700  | -0.00087300 |
| O                                                                  | 3.48727400  | -1.01060600 | 0.00125800  |

Table S31. Optimized TSS1 (nucleophilic attack) for pathway a in cartesian coordinates (M06-2X/6-311++G(d,p)//M06-2X/6-31+G(d,p))

|                                                                    |             |             |             |
|--------------------------------------------------------------------|-------------|-------------|-------------|
| Sum of electronic and thermal Free Energies = -645.746119 Hartrees |             |             |             |
| Number of imaginary frequencies = 1                                |             |             |             |
| C                                                                  | -1.74843000 | -0.00738400 | -0.03025800 |
| C                                                                  | -1.13716800 | -1.25519100 | 0.00451900  |
| C                                                                  | 0.25171800  | -1.30674600 | -0.05022400 |
| C                                                                  | 1.00826500  | -0.13568100 | -0.13661000 |

|   |             |             |             |
|---|-------------|-------------|-------------|
| C | 0.35805600  | 1.10443500  | -0.17083200 |
| C | -1.02766500 | 1.18020200  | -0.11671300 |
| H | -1.73098600 | -2.15938500 | 0.06965000  |
| H | 0.92831700  | 2.02591200  | -0.23075900 |
| H | -1.53873900 | 2.13529500  | -0.13998400 |
| C | 2.53139700  | -0.26213100 | -0.21767600 |
| C | 3.22210600  | 0.72352900  | -1.14644200 |
| H | 2.97527500  | 0.43691700  | -2.17499700 |
| H | 2.92012000  | 1.76091900  | -0.99318800 |
| H | 4.30308400  | 0.63652100  | -1.01175600 |
| O | 3.02346500  | -1.41581300 | -0.10478400 |
| N | 2.92363700  | 0.62787600  | 1.46144500  |
| H | 2.61750400  | 1.59303900  | 1.58219200  |
| H | 3.93801300  | 0.59117800  | 1.55893900  |
| H | 0.76023600  | -2.26434300 | -0.03004600 |
| H | 2.51231400  | 0.05932500  | 2.20096200  |
| N | -3.20970600 | 0.06200300  | 0.02612500  |
| O | -3.73982700 | 1.16251300  | -0.00669400 |
| O | -3.83767900 | -0.98304200 | 0.10415500  |

Table S32. Optimized TSS1 (nucleophilic attack) for pathway c in cartesian coordinates (M06-2X/6-311++G(d,p)//M06-2X/6-31+G(d,p))

Sum of electronic and thermal Free Energies = -874.788601 Hartrees

Number of imaginary frequencies = 1

|   |             |             |             |
|---|-------------|-------------|-------------|
| C | -3.33210700 | -0.10053300 | -0.06359700 |
| C | -2.52735200 | -1.23594900 | -0.02885000 |
| C | -1.15318400 | -1.06487800 | -0.11585100 |
| C | -0.59999400 | 0.21631400  | -0.22309800 |
| C | -1.43596900 | 1.33567900  | -0.25689400 |
| C | -2.81719400 | 1.18411700  | -0.18025800 |
| H | -2.96701600 | -2.22213500 | 0.06111000  |
| H | -1.02606500 | 2.33518400  | -0.34953200 |
| H | -3.47665400 | 2.04331600  | -0.21002900 |
| C | 0.90171600  | 0.34379000  | -0.33285500 |
| C | 1.50756400  | 1.71172200  | -0.50733300 |
| H | 1.33259500  | 2.02515400  | -1.54387000 |
| H | 1.07606100  | 2.45379400  | 0.16406500  |
| H | 2.58484100  | 1.65370600  | -0.33928300 |
| O | 1.53304100  | -0.66835200 | -0.71297400 |
| N | 1.20479600  | 0.29177200  | 1.81112300  |
| H | 0.87631700  | 1.05467400  | 2.39933200  |
| H | 2.22209100  | 0.23486500  | 1.86721300  |
| H | 3.03745300  | -0.59765300 | -0.88675500 |
| O | 4.05093800  | -0.60720000 | -1.05941500 |



|   |             |             |             |
|---|-------------|-------------|-------------|
| C | 4.72986300  | -0.31957600 | 0.03626000  |
| C | 6.21624400  | -0.32102500 | -0.16424900 |
| H | 6.72329100  | -0.06826200 | 0.76596600  |
| H | 6.53291800  | -1.31006100 | -0.50720400 |
| H | 6.47722600  | 0.40074800  | -0.94318500 |
| O | 4.18705300  | -0.07631800 | 1.10870300  |
| H | -0.49799900 | -1.92938500 | -0.09735900 |
| H | 0.81304900  | -0.57838200 | 2.16636200  |
| N | -4.78547600 | -0.26783100 | 0.02381500  |
| O | -5.48715300 | 0.73086300  | -0.01983300 |
| O | -5.23148800 | -1.39913400 | 0.13713800  |

Table S33. Optimized structure of the zwitterionic intermediate for pathway a in cartesian coordinates (M06-2X/6-311++G(d,p)//M06-2X/6-31+G(d,p))

Sum of electronic and thermal Free Energies = -645.744108 Hartrees

Number of imaginary frequencies = 0

|   |             |             |             |
|---|-------------|-------------|-------------|
| C | 1.75358700  | 0.00483900  | -0.01341600 |
| C | 1.12166200  | 1.24271200  | -0.01709700 |
| C | -0.26933800 | 1.27068600  | -0.03345100 |
| C | -1.01061400 | 0.08762800  | -0.04777400 |
| C | -0.33771000 | -1.14243400 | -0.05211500 |
| C | 1.05017700  | -1.19590600 | -0.03051000 |
| H | 1.70186500  | 2.15801500  | -0.00570600 |
| H | -0.88984000 | -2.07833600 | -0.07066500 |
| H | 1.57553800  | -2.14355000 | -0.02861200 |
| C | -2.55384300 | 0.18597400  | -0.08102100 |
| C | -3.13343600 | -0.63609500 | -1.24118400 |
| H | -2.81418000 | -0.16880600 | -2.17704000 |
| H | -2.81204900 | -1.68183800 | -1.24493100 |
| H | -4.22600200 | -0.59593500 | -1.18762400 |
| O | -3.03518700 | 1.40280200  | 0.02543700  |
| N | -3.00658600 | -0.61928200 | 1.23554500  |
| H | -2.73729000 | -1.60638800 | 1.27011900  |
| H | -4.02712000 | -0.55737900 | 1.28628800  |
| H | -0.79497000 | 2.21882300  | -0.03509000 |
| H | -2.62477900 | -0.14267700 | 2.05689800  |
| N | 3.21601200  | -0.03947800 | 0.00985200  |
| O | 3.76365300  | -1.13211300 | 0.01731600  |
| O | 3.82902600  | 1.01743200  | 0.02199700  |

Table S34. Optimized structure of the hydroxi-ammonium ion in cartesian coordinates (M06-2X/6-311++G(d,p)//M06-2X/6-31+G(d,p))

---

Sum of electronic and thermal Free Energies = -874.804899 Hartrees  
Number of imaginary frequencies = 0

---

|   |             |             |             |
|---|-------------|-------------|-------------|
| C | 3.32541700  | -0.05170900 | -0.03513000 |
| C | 2.60824000  | -1.23909200 | -0.09665800 |
| C | 1.22022400  | -1.17727100 | -0.01756900 |
| C | 0.57328700  | 0.05260300  | 0.12011800  |
| C | 1.32764700  | 1.23104000  | 0.18188400  |
| C | 2.71311100  | 1.18955300  | 0.10292500  |
| H | 3.11958200  | -2.18838800 | -0.20389300 |
| H | 0.84267300  | 2.19686700  | 0.29516600  |
| H | 3.30384100  | 2.09657500  | 0.14885500  |
| C | -0.94775400 | 0.11029800  | 0.22308300  |
| C | -1.40911200 | 0.76646100  | 1.52067900  |
| H | -1.03736200 | 0.17507800  | 2.36069700  |
| H | -1.03287600 | 1.78855000  | 1.61039800  |
| H | -2.50276600 | 0.78547000  | 1.55379000  |
| O | -1.46879800 | -1.16129200 | 0.05954700  |
| N | -1.48523700 | 0.94151500  | -0.92520600 |
| H | -1.18463700 | 1.91959800  | -0.87825400 |
| H | -2.57480400 | 0.89718600  | -0.88397900 |
| H | -2.47237700 | -1.14127800 | 0.21156200  |
| O | -4.02633500 | -1.10910100 | 0.37330400  |
| C | -4.65647300 | -0.15216000 | -0.15904500 |
| C | -6.16732200 | -0.16825700 | -0.11291900 |
| H | -6.55328800 | 0.83915300  | 0.05603900  |
| H | -6.53496200 | -0.50959700 | -1.08664400 |
| H | -6.53084400 | -0.84942200 | 0.65726900  |
| O | -4.10215700 | 0.82033900  | -0.75781400 |
| H | 0.63951200  | -2.09040300 | -0.06249600 |
| H | -1.16820000 | 0.54889100  | -1.81671400 |
| N | 4.78705300  | -0.10774000 | -0.11842000 |
| O | 5.41082600  | 0.93992600  | -0.04684400 |
| O | 5.31773900  | -1.19906100 | -0.25577000 |

---

Table S35. Optimized structure of the hemiaminal in cartesian coordinates (M06-2X/6-311++G(d,p)//M06-2X/6-31+G(d,p))

---

Sum of electronic and thermal Free Energies = -645.764001 Hartrees  
Number of imaginary frequencies = 0

---

|   |             |            |             |
|---|-------------|------------|-------------|
| C | -1.74828600 | 0.00381400 | -0.00328000 |
| C | -1.09469300 | 1.22967800 | -0.00306700 |
| C | 0.29706800  | 1.23817800 | -0.01511100 |
| C | 1.01726600  | 0.03987100 | -0.03394200 |

---

|   |             |             |             |
|---|-------------|-------------|-------------|
| C | 0.32300600  | -1.17765900 | -0.03094800 |
| C | -1.06406600 | -1.20874600 | -0.01516500 |
| H | -1.65855600 | 2.15505500  | 0.00721700  |
| H | 0.86923400  | -2.11657400 | -0.04367000 |
| H | -1.60444500 | -2.14787700 | -0.01330700 |
| C | 2.54697200  | 0.02070200  | -0.02329000 |
| C | 3.04702600  | -0.44050700 | 1.34455900  |
| H | 2.66511400  | 0.22524700  | 2.12280400  |
| H | 2.71714200  | -1.46102400 | 1.56026400  |
| H | 4.14148400  | -0.41389600 | 1.35442100  |
| O | 2.96627300  | 1.35136700  | -0.27572300 |
| N | 3.12650200  | -0.83401700 | -1.04983300 |
| H | 3.02870600  | -1.81600300 | -0.80368600 |
| H | 3.93393500  | 1.34067000  | -0.31961300 |
| H | 0.82198100  | 2.18580300  | -0.01250300 |
| H | 2.65404400  | -0.68952300 | -1.94034800 |
| N | -3.21023300 | -0.01486200 | 0.01028100  |
| O | -3.77694800 | -1.09789500 | 0.00918700  |
| O | -3.80535900 | 1.05256600  | 0.02237900  |

Table S36. Optimized TSS2 (lowest energy) in cartesian coordinates  
(M06-2X/6-311++G(d,p)//M06-2X/6-31+G(d,p))

Sum of electronic and thermal Free Energies = -874.77894 Hartrees  
Number of imaginary frequencies = 1

|   |             |             |             |
|---|-------------|-------------|-------------|
| C | -3.31665200 | -0.06417600 | -0.01321600 |
| C | -2.52823300 | -1.18510500 | 0.22790200  |
| C | -1.15807900 | -1.00580400 | 0.35191500  |
| C | -0.59826800 | 0.27245400  | 0.23772900  |
| C | -1.41560400 | 1.37657100  | -0.01273400 |
| C | -2.79251100 | 1.21474800  | -0.13745000 |
| H | -2.97430400 | -2.16908000 | 0.30849400  |
| H | -0.99318800 | 2.37102400  | -0.10438500 |
| H | -3.43938400 | 2.06298500  | -0.32663200 |
| C | 0.88134800  | 0.45217000  | 0.40967700  |
| C | 1.51900300  | 1.74227700  | -0.02011700 |
| H | 1.20559800  | 2.02656900  | -1.02511600 |
| H | 1.21860400  | 2.52434800  | 0.68469500  |
| H | 2.60609000  | 1.64397400  | 0.01490300  |
| O | 1.42354700  | -0.63157000 | -1.05345700 |
| N | 1.42496700  | -0.14830500 | 1.46285600  |
| H | 0.96336800  | -0.94876300 | 1.87863900  |
| H | 2.44506300  | -0.08803500 | 1.56206400  |
| H | 1.13632100  | -0.26130100 | -1.90372600 |
| O | 3.90481300  | -0.53067600 | -1.09116700 |
| C | 4.66397800  | -0.28582600 | -0.09227600 |

|   |             |             |             |
|---|-------------|-------------|-------------|
| C | 6.14967400  | -0.25063100 | -0.38536200 |
| H | 6.36103800  | 0.60429800  | -1.03563000 |
| H | 6.73162100  | -0.15843900 | 0.53219300  |
| H | 6.44266500  | -1.15530100 | -0.92463700 |
| O | 4.25918100  | -0.06624100 | 1.07320800  |
| H | -0.52379900 | -1.87179900 | 0.51560000  |
| H | 2.48195600  | -0.58319600 | -1.03169700 |
| N | -4.76714700 | -0.24354000 | -0.14685400 |
| O | -5.45195100 | 0.74097300  | -0.37397700 |
| O | -5.22238100 | -1.36929000 | -0.02375400 |

Table S37. Optimized TSS2 (highest energy) in cartesian coordinates  
(M06-2X/6-311++G(d,p)//M06-2X/6-31+G(d,p))

Sum of electronic and thermal Free Energies = -874.77728 Hartrees

Number of imaginary frequencies = 1

|   |             |             |             |
|---|-------------|-------------|-------------|
| C | 1.83105000  | -0.78769700 | -0.16634100 |
| C | 1.17723300  | -1.42156000 | 0.88471500  |
| C | -0.20598800 | -1.51709000 | 0.83038200  |
| C | -0.90837100 | -0.99251700 | -0.26078300 |
| C | -0.22086900 | -0.38175900 | -1.31112200 |
| C | 1.16498500  | -0.26929200 | -1.26844000 |
| H | 1.73269800  | -1.80354400 | 1.73280700  |
| H | -0.75459400 | 0.03014100  | -2.16000700 |
| H | 1.71029800  | 0.21740500  | -2.06837900 |
| C | -2.40769700 | -1.03348800 | -0.27425400 |
| C | -3.15683900 | -0.23194700 | -1.29823600 |
| H | -2.78553500 | 0.79216300  | -1.34359600 |
| H | -3.02460700 | -0.71237000 | -2.27335000 |
| H | -4.22271900 | -0.22897600 | -1.05703200 |
| O | -2.59677100 | 0.15951800  | 1.21211700  |
| N | -2.97119300 | -2.17566700 | 0.09800100  |
| H | -2.47926800 | -2.85277800 | 0.66826800  |
| H | -3.97535600 | -2.28728200 | 0.01963400  |
| H | -1.79053900 | 0.86695000  | 1.27739000  |
| H | -0.73225900 | -1.95939000 | 1.67085800  |
| H | -3.41996500 | 0.66190800  | 1.10572400  |
| O | -0.63944300 | 1.65002900  | 1.39273500  |
| C | -0.38881800 | 2.34896100  | 0.34597400  |
| O | -1.23213800 | 2.60224700  | -0.53921100 |
| C | 1.01688000  | 2.90496000  | 0.23180700  |
| H | 1.74898700  | 2.20039500  | 0.63447500  |
| H | 1.25543900  | 3.14604300  | -0.80570400 |
| H | 1.07325900  | 3.82509300  | 0.82427000  |
| N | 3.28850600  | -0.63706900 | -0.09515400 |
| O | 3.83962300  | 0.04710100  | -0.94280900 |

|   |            |             |            |
|---|------------|-------------|------------|
| O | 3.88292500 | -1.19864800 | 0.81123000 |
|---|------------|-------------|------------|

---

Table S38. Optimized structure of iminium in cartesian coordinates (M06-2X/6-311++G(d,p)//M06-2X/6-31+G(d,p))

Sum of electronic and thermal Free Energies = -569.77848 Hartrees  
Number of imaginary frequencies = 0

|   |             |             |             |
|---|-------------|-------------|-------------|
| C | 1.45188200  | 0.00026300  | -0.00518000 |
| C | 0.81369700  | -1.22469100 | 0.14377800  |
| C | -0.57426900 | -1.24363900 | 0.13429400  |
| C | -1.29245600 | -0.04855800 | -0.01499400 |
| C | -0.61661800 | 1.17202700  | -0.14333100 |
| C | 0.77208100  | 1.20198500  | -0.15045000 |
| H | 1.38366500  | -2.13706500 | 0.27052900  |
| H | -1.16347800 | 2.10182600  | -0.25178000 |
| H | 1.31030700  | 2.13561700  | -0.25965400 |
| C | -2.76985000 | -0.05178100 | -0.01273200 |
| C | -3.53322600 | 1.15464500  | 0.39295200  |
| H | -3.13056200 | 1.55763800  | 1.32484800  |
| H | -3.41117700 | 1.91773000  | -0.38447400 |
| H | -4.59428400 | 0.92916000  | 0.50057500  |
| N | -3.41037000 | -1.11145400 | -0.37396400 |
| H | -2.94038500 | -1.94558900 | -0.72090700 |
| H | -4.42825100 | -1.13639500 | -0.34420200 |
| H | -1.08185900 | -2.19205300 | 0.27927800  |
| N | 2.92469500  | 0.02703600  | 0.00371400  |
| O | 3.47837100  | 1.10078300  | -0.15787100 |
| O | 3.51516600  | -1.02596400 | 0.17181000  |

Table S39. Optimized TSS3 in cartesian coordinates (M06-2X/6-311++G(d,p)//M06-2X/6-31+G(d,p))

Sum of electronic and thermal Free Energies = -689.371696 Hartrees  
Number of imaginary frequencies = 1

|   |             |             |             |
|---|-------------|-------------|-------------|
| C | -2.38618500 | 0.02654600  | -0.05500200 |
| C | -1.62204300 | 1.11497500  | 0.35551900  |
| C | -0.25792800 | 0.93061600  | 0.52254500  |
| C | 0.32219300  | -0.31990100 | 0.27959600  |
| C | -0.47335300 | -1.39654300 | -0.12261900 |
| C | -1.84377500 | -1.22718000 | -0.29708200 |
| H | -2.08213700 | 2.07955300  | 0.53313000  |
| H | -0.03788500 | -2.37724300 | -0.28260500 |
| H | -2.47211600 | -2.05304300 | -0.60842200 |
| C | 1.78892400  | -0.53493500 | 0.52549300  |
| C | 2.32420700  | -0.24113400 | 1.90106000  |
| H | 1.96435000  | 0.72091500  | 2.26542400  |

|   |             |             |             |
|---|-------------|-------------|-------------|
| H | 1.96345200  | -1.03104900 | 2.56937000  |
| H | 3.41722200  | -0.24807700 | 1.89221900  |
| H | 0.36330700  | 1.76900800  | 0.82429500  |
| H | 2.21129400  | 0.79569100  | -0.10427100 |
| N | 2.37476400  | -1.52134200 | -0.14006500 |
| H | 2.03344000  | -1.80994000 | -1.05089200 |
| H | 3.32371400  | -1.79091300 | 0.09673200  |
| H | 2.46082500  | 2.04411500  | -1.60896500 |
| H | 3.17413200  | 2.49504400  | 0.25536900  |
| C | 4.28504400  | 0.79807200  | -0.88377900 |
| N | 5.19920000  | 0.10455300  | -1.07108800 |
| B | 3.00191300  | 1.66736900  | -0.60153000 |
| N | -3.83021000 | 0.21332300  | -0.23884900 |
| O | -4.49420600 | -0.74425900 | -0.60200400 |
| O | -4.30053800 | 1.31804200  | -0.02026100 |

Table S40. Optimized structure of ethyl-4-nitrophenyl-amine in cartesian coordinates (M06-2X/6-311++G(d,p)//M06-2X/6-31+G(d,p))

Sum of electronic and thermal Free Energies = -570.533294 Hartrees  
Number of imaginary frequencies = 0

|   |             |             |             |
|---|-------------|-------------|-------------|
| C | -1.47938000 | 0.00314200  | -0.02251500 |
| C | -0.88958800 | 1.24039400  | -0.26581700 |
| C | 0.49546000  | 1.30036800  | -0.34623600 |
| C | 1.27943100  | 0.15078000  | -0.18416600 |
| C | 0.65020600  | -1.07597700 | 0.05954100  |
| C | -0.73479000 | -1.16076800 | 0.14197500  |
| H | -1.49928000 | 2.12704100  | -0.39387300 |
| H | 1.25170600  | -1.97019900 | 0.18235700  |
| H | -1.22832700 | -2.10715100 | 0.33018800  |
| C | 2.78988400  | 0.26977500  | -0.21842700 |
| C | 3.31685100  | 0.55648100  | 1.18903200  |
| H | 2.88502800  | 1.47968500  | 1.58588200  |
| H | 3.06264100  | -0.26946400 | 1.86198600  |
| H | 4.40621700  | 0.66724800  | 1.16639300  |
| H | 0.97740600  | 2.25476000  | -0.54139000 |
| N | 3.39897700  | -0.96728900 | -0.71141900 |
| H | 3.14605400  | -1.11596600 | -1.68660600 |
| H | 4.41149600  | -0.86773700 | -0.68776700 |
| H | 3.03199900  | 1.13412500  | -0.85438200 |
| N | -2.93560100 | -0.07657500 | 0.05946500  |
| O | -3.58392800 | 0.94980200  | -0.08712900 |
| O | -3.44819900 | -1.16610900 | 0.27219900  |

## 8. OPTIMIZED GEOMETRIES FOR THE 4-(THIOMETHYL)ACETOPHENONE'S AMINATION

Table S41. Optimized structure of 4-(thiomethyl)acetophenone in cartesian coordinates (M06-2X/6-311++G(d,p)//M06-2X/6-31+G(d,p))

| Sum of electronic and thermal Free Energies = -822.214597 Hartrees |             |             |             |
|--------------------------------------------------------------------|-------------|-------------|-------------|
| Number of imaginary frequencies = 0                                |             |             |             |
| C                                                                  | 1.31514200  | -0.29148800 | -0.00046600 |
| C                                                                  | 0.77096800  | 1.00023200  | -0.00067700 |
| C                                                                  | -0.60872000 | 1.16950600  | -0.00045500 |
| C                                                                  | -1.47223100 | 0.06879500  | -0.00004900 |
| C                                                                  | -0.92138200 | -1.22127600 | 0.00009400  |
| C                                                                  | 0.45421700  | -1.40096100 | -0.00011900 |
| H                                                                  | 1.41025000  | 1.87573900  | -0.00104100 |
| H                                                                  | -1.56258500 | -2.09739200 | 0.00038100  |
| H                                                                  | 0.86472000  | -2.40721200 | 0.00007800  |
| C                                                                  | -2.94530300 | 0.29812100  | 0.00014600  |
| C                                                                  | -3.86850000 | -0.88982600 | 0.00090500  |
| H                                                                  | -3.68942200 | -1.51076600 | -0.88275900 |
| H                                                                  | -3.68790700 | -1.51115700 | 0.88395500  |
| H                                                                  | -4.90193900 | -0.54241600 | 0.00180900  |
| O                                                                  | -3.39522600 | 1.43929800  | -0.00047400 |
| H                                                                  | -1.02552300 | 2.17211400  | -0.00061200 |
| S                                                                  | 3.04875600  | -0.62815700 | -0.00066900 |
| C                                                                  | 3.78840700  | 1.02289100  | 0.00164800  |
| H                                                                  | 3.51415100  | 1.57975700  | 0.89987000  |
| H                                                                  | 4.86818500  | 0.85993100  | 0.00271500  |
| H                                                                  | 3.51619700  | 1.58155900  | -0.89606000 |

Table S42. Optimized TSS1 (nucleophilic attack) for pathway a in cartesian coordinates (M06-2X/6-311++G(d,p)//M06-2X/6-31+G(d,p))

| Sum of electronic and thermal Free Energies = -878.719349 Hartrees |             |             |             |
|--------------------------------------------------------------------|-------------|-------------|-------------|
| Number of imaginary frequencies = 1                                |             |             |             |
| C                                                                  | 1.66032100  | -0.27997100 | -0.04673600 |
| C                                                                  | 1.12248400  | 1.00913400  | -0.03127900 |
| C                                                                  | -0.26216600 | 1.18750900  | -0.07302800 |
| C                                                                  | -1.13198300 | 0.10102900  | -0.13377900 |
| C                                                                  | -0.58360400 | -1.18887900 | -0.15553500 |
| C                                                                  | 0.79070000  | -1.38068300 | -0.10945400 |
| H                                                                  | 1.76435600  | 1.88238900  | 0.01060400  |
| H                                                                  | -1.22925400 | -2.06238700 | -0.19713600 |
| H                                                                  | 1.19288400  | -2.39075000 | -0.12063500 |
| C                                                                  | -2.63442800 | 0.35740100  | -0.19408000 |
| C                                                                  | -3.40935200 | -0.54247200 | -1.14710500 |

|   |             |             |             |
|---|-------------|-------------|-------------|
| H | -3.14778800 | -0.24481100 | -2.16880000 |
| H | -3.18454900 | -1.60436200 | -1.02853900 |
| H | -4.48053900 | -0.37959500 | -1.00176100 |
| O | -3.03060300 | 1.55459700  | -0.07071400 |
| N | -3.11550500 | -0.49959900 | 1.43953700  |
| H | -2.88078500 | -1.48661400 | 1.54278000  |
| H | -4.12435000 | -0.38855700 | 1.53965700  |
| H | -0.67263400 | 2.19264800  | -0.06261300 |
| H | -2.66043800 | 0.02456500  | 2.18623600  |
| S | 3.39710600  | -0.63295600 | 0.00757000  |
| C | 4.14178000  | 1.01264000  | 0.10577000  |
| H | 5.22021200  | 0.84622900  | 0.15053900  |
| H | 3.91273700  | 1.60680300  | -0.78128000 |
| H | 3.82729100  | 1.53789900  | 1.01013900  |

Table S43. Optimized TSS1 (nucleophilic attack) for pathway c in cartesian coordinates (M06-2X/6-311++G(d,p)//M06-2X/6-31+G(d,p))

Sum of electronic and thermal Free Energies = -1107.764571 Hartrees

Number of imaginary frequencies = 1

|   |             |             |             |
|---|-------------|-------------|-------------|
| C | -3.28644700 | 0.15480300  | -0.05986400 |
| C | -2.54526600 | -1.02501200 | 0.05518900  |
| C | -1.15527500 | -0.98633500 | -0.05067400 |
| C | -0.48046500 | 0.21406200  | -0.27313100 |
| C | -1.22904500 | 1.39339500  | -0.38763600 |
| C | -2.61190200 | 1.36706600  | -0.28077900 |
| H | -3.03290700 | -1.97881900 | 0.22315700  |
| H | -0.73738800 | 2.34848400  | -0.54508100 |
| H | -3.17372200 | 2.29361100  | -0.36745800 |
| C | 1.01679900  | 0.19570800  | -0.40194000 |
| C | 1.68029300  | 1.23328100  | -1.27345400 |
| H | 1.52147500  | 0.93021800  | -2.31566600 |
| H | 1.27099200  | 2.23351900  | -1.13665100 |
| H | 2.75414900  | 1.25202100  | -1.07462800 |
| O | 1.60372800  | -0.90144900 | -0.21103400 |
| N | 1.41926900  | 1.22748700  | 1.43604700  |
| H | 1.16625700  | 2.20714400  | 1.54665500  |
| H | 2.43100100  | 1.12620000  | 1.52275200  |
| H | 3.05826500  | -1.00191500 | -0.42017200 |
| O | 4.07279000  | -1.16074900 | -0.58959300 |
| C | 4.82340400  | -0.40195200 | 0.18371000  |
| C | 6.29594900  | -0.59600400 | -0.03072800 |
| H | 6.55279200  | -1.64425300 | 0.14536700  |
| H | 6.54254200  | -0.36309700 | -1.07053700 |
| H | 6.86432900  | 0.04651500  | 0.64049700  |



|   |             |             |             |
|---|-------------|-------------|-------------|
| O | 4.35534800  | 0.38829000  | 0.99833200  |
| H | -0.58694400 | -1.90711300 | 0.03505100  |
| H | 0.97528400  | 0.69492700  | 2.18132300  |
| S | -5.05117400 | 0.23198700  | 0.05489000  |
| C | -5.51713000 | -1.49240800 | 0.34053700  |
| H | -6.60632600 | -1.49361200 | 0.41957500  |
| H | -5.22278500 | -2.12745900 | -0.49766500 |
| H | -5.09353500 | -1.86894100 | 1.27389200  |

Table S44. Optimized structure of the zwitterionic intermediate for pathway a in cartesian coordinates (M06-2X/6-311++G(d,p)//M06-2X/6-31+G(d,p))

|                                                                   |             |             |             |
|-------------------------------------------------------------------|-------------|-------------|-------------|
| Sum of electronic and thermal Free Energies = -878.71823 Hartrees |             |             |             |
| Number of imaginary frequencies = 0                               |             |             |             |
| C                                                                 | 1.66446700  | -0.28511600 | -0.01808300 |
| C                                                                 | 1.10893600  | 0.99611300  | -0.03483400 |
| C                                                                 | -0.27928000 | 1.15621200  | -0.05182600 |
| C                                                                 | -1.13615600 | 0.05906400  | -0.05680300 |
| C                                                                 | -0.56899900 | -1.22310000 | -0.04763200 |
| C                                                                 | 0.80885700  | -1.39774200 | -0.02435900 |
| H                                                                 | 1.73983400  | 1.87845300  | -0.03461700 |
| H                                                                 | -1.20252700 | -2.10755100 | -0.05405500 |
| H                                                                 | 1.22345200  | -2.40283900 | -0.01224900 |
| C                                                                 | -2.65955200 | 0.28780300  | -0.08747200 |
| C                                                                 | -3.32754000 | -0.51331000 | -1.21385500 |
| H                                                                 | -2.98257800 | -0.10404500 | -2.16778700 |
| H                                                                 | -3.09609200 | -1.58249300 | -1.19026300 |
| H                                                                 | -4.41230700 | -0.37937900 | -1.15026600 |
| O                                                                 | -3.04188900 | 1.54338500  | -0.00931100 |
| N                                                                 | -3.17276400 | -0.44446900 | 1.25762600  |
| H                                                                 | -2.94889300 | -1.44065500 | 1.32956500  |
| H                                                                 | -4.18881500 | -0.33066200 | 1.30339500  |
| H                                                                 | -0.70476600 | 2.15473400  | -0.06346700 |
| H                                                                 | -2.76592800 | 0.04286000  | 2.05993500  |
| S                                                                 | 3.40791300  | -0.61328200 | 0.01066100  |
| C                                                                 | 4.13002200  | 1.04509700  | 0.03060300  |
| H                                                                 | 5.21160800  | 0.89589900  | 0.05437500  |
| H                                                                 | 3.87040900  | 1.60336700  | -0.87124500 |
| H                                                                 | 3.82993600  | 1.59889600  | 0.92276600  |

Table S45. Optimized structure of the hydroxi-ammonium ion in cartesian coordinates (M06-2X/6-311++G(d,p)//M06-2X/6-31+G(d,p))

| Sum of electronic and thermal Free Energies = -1107.779576 Hartrees |             |             |             |
|---------------------------------------------------------------------|-------------|-------------|-------------|
| Number of imaginary frequencies = 0                                 |             |             |             |
| C                                                                   | -3.26745700 | 0.21870600  | 0.00324400  |
| C                                                                   | -2.57391200 | -0.99261100 | 0.04261700  |
| C                                                                   | -1.17854700 | -1.00540500 | -0.02443600 |
| C                                                                   | -0.45491900 | 0.17928700  | -0.13382300 |
| C                                                                   | -1.15598900 | 1.39187700  | -0.17842400 |
| C                                                                   | -2.54161300 | 1.41519600  | -0.10784700 |
| H                                                                   | -3.10033300 | -1.93699400 | 0.12542000  |
| H                                                                   | -0.62342900 | 2.33620500  | -0.26946400 |
| H                                                                   | -3.06346000 | 2.36806900  | -0.14267700 |
| C                                                                   | 1.06482500  | 0.16155100  | -0.21350800 |
| C                                                                   | 1.59482800  | 0.83756600  | -1.47376300 |
| H                                                                   | 1.22492600  | 0.28857600  | -2.34290100 |
| H                                                                   | 1.26037000  | 1.87586000  | -1.54245900 |
| H                                                                   | 2.68916700  | 0.81587100  | -1.47701000 |
| O                                                                   | 1.52535600  | -1.13867000 | -0.08201100 |
| N                                                                   | 1.62299400  | 0.92654700  | 0.97630100  |
| H                                                                   | 1.36207500  | 1.91674900  | 0.96111000  |
| H                                                                   | 2.70003500  | 0.83758900  | 0.95493300  |
| H                                                                   | 2.52892700  | -1.15904000 | -0.22007400 |
| O                                                                   | 4.09174500  | -1.20173500 | -0.37184100 |
| C                                                                   | 4.76633000  | -0.29064100 | 0.18845400  |
| C                                                                   | 6.27183100  | -0.33212800 | 0.04772500  |
| H                                                                   | 6.62194200  | -1.35710700 | -0.08432800 |
| H                                                                   | 6.54508400  | 0.24218100  | -0.84446200 |
| H                                                                   | 6.75540400  | 0.12837300  | 0.91090100  |
| O                                                                   | 4.25961300  | 0.67570300  | 0.83404100  |
| H                                                                   | -0.65544200 | -1.95462300 | 0.00839900  |
| H                                                                   | 1.26933300  | 0.51527600  | 1.84520300  |
| S                                                                   | -5.03260900 | 0.35733400  | 0.08518700  |
| C                                                                   | -5.56762200 | -1.36587200 | 0.21104300  |
| H                                                                   | -6.65789900 | -1.33316800 | 0.26286200  |
| H                                                                   | -5.27225400 | -1.93856200 | -0.67067400 |
| H                                                                   | -5.18389200 | -1.83596100 | 1.11892500  |

Table S46. Optimized structure of the hemiaminal in cartesian coordinates (M06-2X/6-311++G(d,p)//M06-2X/6-31+G(d,p))

| Sum of electronic and thermal Free Energies = -878.737038 Hartrees |             |             |             |
|--------------------------------------------------------------------|-------------|-------------|-------------|
| Number of imaginary frequencies = 0                                |             |             |             |
| C                                                                  | -1.66355600 | -0.29161100 | -0.00488900 |
| C                                                                  | -1.08388800 | 0.97812400  | -0.01500600 |

|   |             |             |             |
|---|-------------|-------------|-------------|
| C | 0.30738400  | 1.11573900  | -0.02916400 |
| C | 1.14394400  | 0.00073800  | -0.04122200 |
| C | 0.55251600  | -1.26952700 | -0.02672900 |
| C | -0.82768400 | -1.41902300 | -0.00897700 |
| H | -1.69717500 | 1.87268500  | -0.01224100 |
| H | 1.17560900  | -2.16077600 | -0.03165100 |
| H | -1.25968300 | -2.41672400 | -0.00040700 |
| C | 2.66713300  | 0.12488300  | -0.02260900 |
| C | 3.20429700  | -0.18887200 | 1.37319100  |
| H | 2.76150400  | 0.49565100  | 2.10144000  |
| H | 2.96053300  | -1.21543000 | 1.66384100  |
| H | 4.29273300  | -0.06818200 | 1.38287000  |
| O | 2.96774600  | 1.47081600  | -0.36640500 |
| N | 3.34247000  | -0.73758200 | -0.98473000 |
| H | 3.34774900  | -1.70235800 | -0.66264200 |
| H | 3.93208000  | 1.53506900  | -0.42998100 |
| H | 0.73499200  | 2.11263100  | -0.03432900 |
| H | 2.85460700  | -0.71639600 | -1.87850600 |
| S | -3.41340000 | -0.58664900 | 0.01280700  |
| C | -4.10288200 | 1.08564000  | 0.01878400  |
| H | -5.18742000 | 0.95788900  | 0.02968200  |
| H | -3.80287300 | 1.63667000  | 0.91269600  |
| H | -3.82108300 | 1.63564900  | -0.88160900 |

Table S47. Optimized TSS2 (lowest energy) in cartesian coordinates  
(M06-2X/6-311++G(d,p)//M06-2X/6-31+G(d,p))

Sum of electronic and thermal Free Energies = -1107.755421 Hartrees

Number of imaginary frequencies = 1

|   |             |             |             |
|---|-------------|-------------|-------------|
| C | -3.24566300 | -0.29755100 | 0.00573600  |
| C | -2.37601100 | -1.39274500 | 0.14810700  |
| C | -1.01327400 | -1.19130300 | 0.29413000  |
| C | -0.47934300 | 0.10560200  | 0.29871900  |
| C | -1.34193500 | 1.18939000  | 0.14494700  |
| C | -2.71736200 | 0.99545100  | 0.00602900  |
| H | -2.76951800 | -2.40574900 | 0.13606300  |
| H | -0.95818800 | 2.20468200  | 0.14176400  |
| H | -3.35831700 | 1.86315400  | -0.10125100 |
| C | 0.98920700  | 0.31317800  | 0.48458100  |
| C | 1.57349100  | 1.67444300  | 0.22240300  |
| H | 1.25528600  | 2.06632600  | -0.74429000 |
| H | 1.23423000  | 2.35187800  | 1.01252600  |
| H | 2.66391500  | 1.62074000  | 0.25782400  |
| O | 1.58886800  | -0.56316400 | -1.05796500 |
| N | 1.56619500  | -0.37527500 | 1.47605100  |
| H | 1.14687000  | -1.24588100 | 1.77968700  |

|   |             |             |             |
|---|-------------|-------------|-------------|
| H | 2.58499400  | -0.30395100 | 1.55379800  |
| H | 1.23153900  | -0.14890900 | -1.86008600 |
| O | 4.04364600  | -0.26995600 | -1.18854700 |
| C | 4.80810000  | -0.14562800 | -0.16984600 |
| C | 6.28234400  | 0.02810800  | -0.47038700 |
| H | 6.62464800  | -0.78492500 | -1.11648000 |
| H | 6.42602100  | 0.96576700  | -1.01637500 |
| H | 6.87295000  | 0.04759100  | 0.44602300  |
| O | 4.41299500  | -0.14901000 | 1.01798700  |
| H | -0.35841300 | -2.05463300 | 0.37732700  |
| H | 2.64719400  | -0.43504300 | -1.07628200 |
| S | -4.96733900 | -0.66430000 | -0.17251200 |
| C | -5.71504300 | 0.97261000  | -0.35570500 |
| H | -6.78520200 | 0.79476000  | -0.48115900 |
| H | -5.55985800 | 1.58243400  | 0.53666300  |
| H | -5.33522300 | 1.48518600  | -1.24199500 |

Table S48. Optimized TSS2 (highest energy) in cartesian coordinates  
(M06-2X/6-311++G(d,p)//M06-2X/6-31+G(d,p))

Sum of electronic and thermal Free Energies = -1107.754923 Hartrees  
Number of imaginary frequencies = 1

|   |             |             |             |
|---|-------------|-------------|-------------|
| C | -1.87771800 | -0.52734700 | 0.40311500  |
| C | -1.33486100 | -1.23967900 | -0.67299000 |
| C | 0.03400300  | -1.48419300 | -0.72485500 |
| C | 0.88392700  | -1.03081700 | 0.28702300  |
| C | 0.33836800  | -0.32311500 | 1.36206400  |
| C | -1.02738500 | -0.07668600 | 1.42278300  |
| H | -1.96117200 | -1.59509100 | -1.48333000 |
| H | 0.97333600  | 0.05054100  | 2.15863000  |
| H | -1.43208500 | 0.47884700  | 2.26491300  |
| C | 2.35918300  | -1.24515600 | 0.18681100  |
| C | 3.27003200  | -0.56602500 | 1.17079700  |
| H | 3.04214800  | 0.49699100  | 1.25116400  |
| H | 3.13871500  | -1.04252700 | 2.14760000  |
| H | 4.31027500  | -0.69585200 | 0.86127800  |
| O | 2.62861000  | -0.10801700 | -1.29120100 |
| N | 2.75719900  | -2.45585900 | -0.21369800 |
| H | 2.15134200  | -3.04641500 | -0.76915300 |
| H | 3.74748100  | -2.66567800 | -0.24851100 |
| H | 1.91668200  | 0.70293400  | -1.32044000 |
| H | 0.43467700  | -1.99938500 | -1.59439800 |
| H | 3.51555200  | 0.28193600  | -1.23847600 |
| O | 0.89629200  | 1.63748400  | -1.38716700 |
| C | 0.82124400  | 2.37949500  | -0.34230100 |

|   |             |             |             |
|---|-------------|-------------|-------------|
| O | 1.75242700  | 2.52316600  | 0.47678900  |
| C | -0.47760800 | 3.13482700  | -0.14696700 |
| H | -0.42027800 | 4.07182000  | -0.71242100 |
| H | -1.32470100 | 2.56024000  | -0.52856600 |
| H | -0.62802400 | 3.37715000  | 0.90677100  |
| S | -3.59730200 | -0.14395600 | 0.56589500  |
| C | -4.31588500 | -0.84859300 | -0.93738200 |
| H | -4.18155900 | -1.93170300 | -0.97240000 |
| H | -5.38381800 | -0.62634100 | -0.88484100 |
| H | -3.90056900 | -0.38047800 | -1.83219300 |

Table S49. Optimized structure of iminium in cartesian coordinates (M06-2X/6-311++G(d,p)//M06-2X/6-31+G(d,p))

---

Sum of electronic and thermal Free Energies = -802.762522 Hartrees  
Number of imaginary frequencies = 0

---

|   |             |             |             |
|---|-------------|-------------|-------------|
| C | 1.37208600  | -0.29573800 | -0.00014500 |
| C | 0.56176000  | -1.44846500 | 0.00144700  |
| C | -0.81373500 | -1.33810500 | 0.00123000  |
| C | -1.43306600 | -0.07146800 | -0.00036300 |
| C | -0.61848700 | 1.07132000  | -0.00202400 |
| C | 0.76577800  | 0.96699900  | -0.00211800 |
| H | 1.01884200  | -2.43367800 | 0.00307200  |
| H | -1.05926700 | 2.06240300  | -0.00344800 |
| H | 1.35887000  | 1.87372500  | -0.00356000 |
| C | -2.88352600 | 0.08439400  | -0.00006100 |
| C | -3.51667500 | 1.43355000  | 0.00365600  |
| H | -3.19101600 | 1.98988700  | 0.88716400  |
| H | -3.19759900 | 1.99117800  | -0.88154200 |
| H | -4.60319600 | 1.35131300  | 0.00758700  |
| N | -3.67348500 | -0.94575400 | -0.00310000 |
| H | -3.33904700 | -1.90501700 | -0.00641100 |
| H | -4.68203500 | -0.81752000 | -0.00327000 |
| H | -1.39282400 | -2.25605500 | 0.00293400  |
| S | 3.10933200  | -0.55059100 | 0.00072500  |
| C | 3.77331800  | 1.13201000  | -0.00019700 |
| H | 4.85901800  | 1.01597000  | 0.00090900  |
| H | 3.47515300  | 1.67449800  | -0.89955200 |
| H | 3.47346500  | 1.67605300  | 0.89766300  |

Table S50. Optimized TSS3 in cartesian coordinates (M06-2X/6-311++G(d,p)//M06-2X/6-31+G(d,p))

---

Sum of electronic and thermal Free Energies = -922.349003 Hartrees  
Number of imaginary frequencies = 1

---

|   |            |             |            |
|---|------------|-------------|------------|
| C | 2.30188400 | -0.27424700 | 0.02555700 |
| C | 1.43250200 | -1.33987200 | 0.31911400 |

|   |             |             |             |
|---|-------------|-------------|-------------|
| C | 0.07755100  | -1.11241600 | 0.48850600  |
| C | -0.45104100 | 0.18033800  | 0.36784900  |
| C | 0.41318300  | 1.23739100  | 0.08261500  |
| C | 1.78091500  | 1.01649600  | -0.08773200 |
| H | 1.82046100  | -2.35135600 | 0.40504900  |
| H | 0.03634000  | 2.25310800  | 0.00987300  |
| H | 2.42213200  | 1.86384400  | -0.30253300 |
| C | -1.91172100 | 0.42622100  | 0.59512200  |
| C | -2.51140700 | -0.02308900 | 1.90460100  |
| H | -2.21273900 | -1.04369600 | 2.14428600  |
| H | -2.14096500 | 0.64776400  | 2.68733900  |
| H | -3.60241100 | 0.03854300  | 1.86483800  |
| N | -2.41542300 | 1.56361800  | 0.09695500  |
| H | -2.04679800 | 1.94663300  | -0.76613900 |
| H | -3.37081700 | 1.81618100  | 0.32287700  |
| H | -0.58331000 | -1.95156600 | 0.69221000  |
| H | -2.37730000 | -0.69412700 | -0.20629700 |
| B | -3.18353900 | -1.46177900 | -0.86530200 |
| H | -3.41848700 | -2.38717900 | -0.13529600 |
| H | -2.58989100 | -1.70217000 | -1.88276700 |
| C | -4.40857000 | -0.49606200 | -1.06840500 |
| N | -5.27993200 | 0.26367800  | -1.18881800 |
| S | 4.01299200  | -0.67385600 | -0.17637000 |
| C | 4.75248900  | 0.91772000  | -0.61466500 |
| H | 5.81321800  | 0.71474600  | -0.77677700 |
| H | 4.32219900  | 1.31276000  | -1.53740100 |
| H | 4.65096100  | 1.64117000  | 0.19683400  |

Table S51. Optimized structure of ethyl-4-(tiomethyl)phenyl-amine in cartesian coordinates (M06-2X/6-311++G(d,p)//M06-2X/6-31+G(d,p))

---

Sum of electronic and thermal Free Energies = -803.50554 Hartrees  
Number of imaginary frequencies = 0

---

|   |             |             |             |
|---|-------------|-------------|-------------|
| C | 1.38044900  | -0.26256700 | -0.01337100 |
| C | 0.88434200  | 1.03373700  | 0.13723200  |
| C | -0.49589600 | 1.24847000  | 0.19554700  |
| C | -1.40276000 | 0.19428500  | 0.10316200  |
| C | -0.89340700 | -1.10292000 | -0.04857400 |
| C | 0.47533000  | -1.33216100 | -0.10564900 |
| H | 1.55326000  | 1.88385600  | 0.21638900  |
| H | -1.57876700 | -1.94351200 | -0.11750600 |
| H | 0.84630500  | -2.34784100 | -0.22187800 |
| C | -2.89660900 | 0.44994800  | 0.12501300  |
| C | -3.50339100 | 0.28172600  | -1.26720500 |
| H | -3.04167200 | 0.97461200  | -1.97697400 |

|   |             |             |             |
|---|-------------|-------------|-------------|
| H | -3.35114800 | -0.74154900 | -1.62745400 |
| H | -4.58013600 | 0.48304300  | -1.24088300 |
| H | -0.86594500 | 2.26417100  | 0.31816200  |
| N | -3.55655100 | -0.48882900 | 1.04264300  |
| H | -3.22116700 | -0.33645500 | 1.99187200  |
| H | -4.55598800 | -0.29448900 | 1.05513600  |
| H | -3.04295400 | 1.49568500  | 0.43487400  |
| S | 3.10866500  | -0.66281800 | -0.09271500 |
| C | 3.90470400  | 0.95445200  | 0.05686100  |
| H | 4.97871500  | 0.76091700  | 0.01466100  |
| H | 3.63146300  | 1.61112200  | -0.77195100 |
| H | 3.66867900  | 1.42751000  | 1.01240000  |

## 9. OPTIMIZED GEOMETRIES FOR THE 4-HYDROXYACETOPHENONE'S AMINATION

Table S52. Optimized structure of 4-hydroxyacetophenone in cartesian coordinates (M06-2X/6-311++G(d,p)//M06-2X/6-31+G(d,p))

Sum of electronic and thermal Free Energies = -459.975872 Hartrees  
Number of imaginary frequencies = 0

|   |             |             |             |
|---|-------------|-------------|-------------|
| C | 2.13437200  | 0.06420200  | 0.00000600  |
| C | 1.49950000  | -1.18344100 | -0.00008600 |
| C | 0.11399900  | -1.24240100 | -0.00003600 |
| C | -0.65784700 | -0.07200100 | 0.00009400  |
| C | -0.00414800 | 1.16916800  | 0.00018000  |
| C | 1.38211100  | 1.24241000  | 0.00014800  |
| H | 2.09729300  | -2.09086500 | -0.00019500 |
| H | -0.57468000 | 2.09263400  | 0.00031200  |
| H | 1.89448700  | 2.19927100  | 0.00022100  |
| C | -2.14155700 | -0.18065100 | 0.00003500  |
| C | -2.96598300 | 1.07889700  | -0.00027800 |
| H | -2.73763400 | 1.68364800  | 0.88311400  |
| H | -2.73745000 | 1.68331600  | -0.88384800 |
| H | -4.02427200 | 0.81652800  | -0.00033200 |
| O | -2.68586600 | -1.28105700 | 0.00018700  |
| H | -0.38465100 | -2.20674200 | -0.00011300 |
| O | 3.48525000  | 0.18724700  | -0.00010500 |
| H | 3.90916600  | -0.68441300 | -0.00018600 |

Table S53. Optimized TSS1 (nucleophilic attack) for pathway a in cartesian coordinates (M06-2X/6-311++G(d,p)//M06-2X/6-31+G(d,p))

---

Sum of electronic and thermal Free Energies = -516.480197 Hartrees  
 Number of imaginary frequencies = 1

---

|   |             |             |             |
|---|-------------|-------------|-------------|
| C | 2.44921400  | -0.03011300 | 0.00521200  |
| C | 1.81909100  | 1.21386900  | 0.04139400  |
| C | 0.43000200  | 1.28191500  | -0.02176800 |
| C | -0.34886400 | 0.12622100  | -0.12333600 |
| C | 0.30205500  | -1.11185400 | -0.16076500 |
| C | 1.68999600  | -1.19794000 | -0.09550700 |
| H | 2.42269400  | 2.11372500  | 0.11513000  |
| H | -0.27011100 | -2.03297800 | -0.23174000 |
| H | 2.18743200  | -2.16406500 | -0.12206400 |
| C | -1.86566900 | 0.26040800  | -0.20766900 |
| C | -2.55169200 | -0.70488200 | -1.16600200 |
| H | -2.29457800 | -0.39749500 | -2.18587400 |
| H | -2.25162800 | -1.74623500 | -1.03297100 |
| H | -3.63471900 | -0.62196700 | -1.04152200 |
| O | -2.35837400 | 1.42573400  | -0.10773800 |
| N | -2.31056500 | -0.60874600 | 1.41880400  |
| H | -2.00073100 | -1.57358800 | 1.53363300  |
| H | -3.32631500 | -0.57580800 | 1.50429000  |
| H | -0.06350600 | 2.24847700  | 0.00226900  |
| H | -1.90788100 | -0.04465500 | 2.16645200  |
| O | 3.81232000  | -0.05157300 | 0.07029500  |
| H | 4.13692100  | -0.96322100 | 0.03096600  |

---

Table S54. Optimized TSS1 (nucleophilic attack) for pathway c in cartesian coordinates (M06-2X/6-311++G(d,p)//M06-2X/6-31+G(d,p))

---

Sum of electronic and thermal Free Energies = -745.524675 Hartrees  
 Number of imaginary frequencies = 1

---

|   |             |             |             |
|---|-------------|-------------|-------------|
| C | -4.04626500 | -0.20796900 | 0.07312300  |
| C | -3.23798700 | -1.31722300 | 0.32652000  |
| C | -1.85805700 | -1.20611900 | 0.18591800  |
| C | -1.26805300 | -0.00160600 | -0.20692700 |
| C | -2.09506600 | 1.10165600  | -0.45688400 |
| C | -3.47353900 | 1.00613200  | -0.31732100 |
| H | -3.69154400 | -2.25849700 | 0.62599800  |
| H | -1.66757700 | 2.05627800  | -0.74819900 |
| H | -4.11637500 | 1.86051700  | -0.50591500 |
| C | 0.22358700  | 0.05850500  | -0.36634500 |
| C | 0.80253400  | 0.99019300  | -1.40315300 |
| H | 0.65484500  | 0.51706400  | -2.38171000 |
| H | 0.32296900  | 1.96832600  | -1.41495500 |

---



|   |             |             |             |
|---|-------------|-------------|-------------|
| H | 1.87429000  | 1.11550500  | -1.23296100 |
| O | 0.88641300  | -0.96014000 | -0.03049600 |
| N | 0.60120000  | 1.37343700  | 1.27573700  |
| H | 0.28918500  | 2.34186700  | 1.24732100  |
| H | 1.61886900  | 1.34589000  | 1.34630800  |
| H | 2.32646800  | -1.00340500 | -0.27717000 |
| O | 3.34716100  | -1.12102400 | -0.46419100 |
| C | 4.06786800  | -0.21051100 | 0.15781400  |
| C | 5.54265700  | -0.33656100 | -0.09077900 |
| H | 5.87961800  | -1.32879900 | 0.22186000  |
| H | 5.73692900  | -0.24183100 | -1.16296900 |
| H | 6.08629000  | 0.43277500  | 0.45610700  |
| O | 3.57348600  | 0.65874200  | 0.87070600  |
| H | -1.22817400 | -2.06883300 | 0.37778100  |
| H | 0.20626000  | 0.93265500  | 2.10397300  |
| O | -5.40175000 | -0.25289100 | 0.19227900  |
| H | -5.68901800 | -1.14004200 | 0.45618700  |

Table S55. Optimized structure of the zwitterionic intermediate for pathway a in cartesian coordinates (M06-2X/6-311++G(d,p)//M06-2X/6-31+G(d,p))

|                                                                    |             |             |             |
|--------------------------------------------------------------------|-------------|-------------|-------------|
| Sum of electronic and thermal Free Energies = -516.477899 Hartrees |             |             |             |
| Number of imaginary frequencies = 0                                |             |             |             |
| C                                                                  | 2.45315000  | -0.01419500 | 0.00034000  |
| C                                                                  | 1.80079900  | 1.21800900  | -0.00846400 |
| C                                                                  | 0.40847100  | 1.25984500  | -0.03295000 |
| C                                                                  | -0.35255200 | 0.08937100  | -0.05316400 |
| C                                                                  | 0.32214200  | -1.13732800 | -0.05019400 |
| C                                                                  | 1.71333800  | -1.19803400 | -0.01937800 |
| H                                                                  | 2.38953900  | 2.13069600  | 0.00382200  |
| H                                                                  | -0.23276300 | -2.07299100 | -0.06822700 |
| H                                                                  | 2.22745600  | -2.15588500 | -0.01270300 |
| C                                                                  | -1.89014200 | 0.18864000  | -0.09118700 |
| C                                                                  | -2.48492800 | -0.65715500 | -1.22634800 |
| H                                                                  | -2.17505300 | -0.21036100 | -2.17544600 |
| H                                                                  | -2.16126300 | -1.70233600 | -1.21195400 |
| H                                                                  | -3.57752900 | -0.61922900 | -1.16507000 |
| O                                                                  | -2.37993200 | 1.40753700  | -0.00747800 |
| N                                                                  | -2.35015300 | -0.59197700 | 1.24532000  |
| H                                                                  | -2.06704500 | -1.57394100 | 1.29984300  |
| H                                                                  | -3.37090600 | -0.54077900 | 1.29621400  |
| H                                                                  | -0.10255200 | 2.21728000  | -0.03902900 |
| H                                                                  | -1.97024600 | -0.09368300 | 2.05388100  |
| O                                                                  | 3.81893000  | -0.00923300 | 0.02826800  |
| H                                                                  | 4.15777400  | -0.91626800 | 0.02318100  |

Table S56. Optimized structure of the hydroxi-ammonium ion in cartesian coordinates (M06-2X/6-311++G(d,p)//M06-2X/6-31+G(d,p))

---

Sum of electronic and thermal Free Energies = -745.540564 Hartrees  
 Number of imaginary frequencies = 0

---

|   |             |             |             |
|---|-------------|-------------|-------------|
| C | -4.03634800 | 0.11126000  | -0.10719300 |
| C | -3.27798500 | 1.27720900  | -0.20802400 |
| C | -1.89105500 | 1.21145700  | -0.10798100 |
| C | -1.24484800 | -0.01020900 | 0.09542300  |
| C | -2.01941100 | -1.17055300 | 0.19447900  |
| C | -3.40630500 | -1.11913200 | 0.09196400  |
| H | -3.78152700 | 2.22671600  | -0.36307200 |
| H | -1.54795400 | -2.13835600 | 0.35191600  |
| H | -3.99933700 | -2.02645800 | 0.16980000  |
| C | 0.27022100  | -0.08064700 | 0.21387200  |
| C | 0.73236500  | -0.72330100 | 1.51770400  |
| H | 0.37054900  | -0.11544700 | 2.35036500  |
| H | 0.34234900  | -1.73854600 | 1.62506800  |
| H | 1.82579700  | -0.75791700 | 1.55023300  |
| O | 0.81315600  | 1.18256700  | 0.03276400  |
| N | 0.80900100  | -0.93503100 | -0.92277800 |
| H | 0.48050300  | -1.90348600 | -0.86897000 |
| H | 1.89021200  | -0.91785900 | -0.87391500 |
| H | 1.81128000  | 1.14788400  | 0.19123500  |
| O | 3.38215100  | 1.09489200  | 0.36327400  |
| C | 4.00525100  | 0.11552600  | -0.13593900 |
| C | 5.51651200  | 0.11098600  | -0.06610400 |
| H | 5.88390600  | -0.89600000 | 0.14302700  |
| H | 5.90540700  | 0.41317400  | -1.04446800 |
| H | 5.87907400  | 0.81134100  | 0.68720600  |
| O | 3.44608100  | -0.86270600 | -0.71884800 |
| H | -1.30748600 | 2.12187600  | -0.18600300 |
| H | 0.50583200  | -0.54326300 | -1.81910900 |
| O | -5.39086000 | 0.23029500  | -0.21071900 |
| H | -5.81622400 | -0.63440500 | -0.11484100 |

---

Table S57. Optimized structure of the hemiaminal in cartesian coordinates (M06-2X/6-311++G(d,p)//M06-2X/6-31+G(d,p))

---

Sum of electronic and thermal Free Energies = -516.497244 Hartrees  
 Number of imaginary frequencies = 0

---

|   |             |             |             |
|---|-------------|-------------|-------------|
| C | -2.44841300 | 0.00896200  | 0.00822500  |
| C | -1.76001600 | 1.22097800  | -0.00451800 |
| C | -0.36675200 | 1.22499400  | -0.02803200 |
| C | 0.35899700  | 0.02988500  | -0.04737100 |
| C | -0.35058900 | -1.17499200 | -0.03006900 |

---

|   |             |             |             |
|---|-------------|-------------|-------------|
| C | -1.74285800 | -1.19524200 | -0.00243900 |
| H | -2.32094700 | 2.15095300  | 0.00377200  |
| H | 0.18369500  | -2.12208100 | -0.03877200 |
| H | -2.28411500 | -2.13790400 | 0.00886400  |
| C | 1.88758000  | 0.01353300  | -0.02718600 |
| C | 2.39412400  | -0.28509500 | 1.38334900  |
| H | 2.01334200  | 0.46747000  | 2.07888300  |
| H | 2.05819900  | -1.27182200 | 1.71706300  |
| H | 3.48911400  | -0.26230800 | 1.39441000  |
| O | 2.30921900  | 1.31151900  | -0.42709500 |
| N | 2.48597600  | -0.94709800 | -0.94601600 |
| H | 2.40960700  | -1.89236300 | -0.57878200 |
| H | 3.27671300  | 1.29244400  | -0.46976600 |
| H | 0.15826100  | 2.17419300  | -0.03490700 |
| H | 2.00116900  | -0.92652300 | -1.84137500 |
| O | -3.81395900 | 0.05591200  | 0.03143200  |
| H | -4.18138100 | -0.83995000 | 0.03627500  |

Table S58. Optimized TSS2 (lowest energy) in cartesian coordinates  
(M06-2X/6-311++G(d,p)//M06-2X/6-31+G(d,p))

Sum of electronic and thermal Free Energies = -745.516057 Hartrees  
Number of imaginary frequencies = 1

|   |             |             |             |
|---|-------------|-------------|-------------|
| C | -4.02454000 | -0.18872000 | -0.13908600 |
| C | -3.20340800 | -1.29440800 | 0.10768500  |
| C | -1.84044700 | -1.10958200 | 0.28380900  |
| C | -1.27367200 | 0.17123700  | 0.21569300  |
| C | -2.10384900 | 1.26353100  | -0.04361100 |
| C | -3.47533200 | 1.09086500  | -0.21526200 |
| H | -3.64451700 | -2.28533100 | 0.15110200  |
| H | -1.69445900 | 2.26671900  | -0.10470800 |
| H | -4.11752600 | 1.94554100  | -0.40898200 |
| C | 0.19194300  | 0.35808500  | 0.43326900  |
| C | 0.81024400  | 1.69526100  | 0.12618000  |
| H | 0.53610900  | 2.04313000  | -0.87048300 |
| H | 0.45518200  | 2.41766000  | 0.86794400  |
| H | 1.89747900  | 1.62503600  | 0.20511200  |
| O | 0.82193300  | -0.59892400 | -1.04160500 |
| N | 0.72883600  | -0.29000100 | 1.47563100  |
| H | 0.28639600  | -1.13957100 | 1.80447200  |
| H | 1.74690100  | -0.23871200 | 1.57227500  |
| H | 0.48915900  | -0.21765500 | -1.87018400 |
| O | 3.28157800  | -0.34540600 | -1.12903500 |
| C | 4.02380300  | -0.20690500 | -0.09551700 |
| C | 5.51009700  | -0.09395900 | -0.36398000 |

|   |             |             |             |
|---|-------------|-------------|-------------|
| H | 5.69502000  | 0.75476800  | -1.02894600 |
| H | 6.07059700  | 0.03539800  | 0.56231800  |
| H | 5.85339400  | -0.99618600 | -0.87878300 |
| O | 3.59934900  | -0.16051600 | 1.08104700  |
| H | -1.21020500 | -1.97918600 | 0.45168800  |
| H | 1.88346900  | -0.48713700 | -1.04131500 |
| O | -5.35374200 | -0.42404200 | -0.30228000 |
| H | -5.83082800 | 0.40421800  | -0.46102200 |

Table S59. Optimized TSS2 (highest energy) in cartesian coordinates  
(M06-2X/6-311++G(d,p)//M06-2X/6-31+G(d,p))

Sum of electronic and thermal Free Energies = -745.514905 Hartrees  
Number of imaginary frequencies = 1

|   |             |             |             |
|---|-------------|-------------|-------------|
| C | -2.21722200 | -1.28236600 | 0.15473900  |
| C | -1.44280200 | -1.75769100 | -0.90761700 |
| C | -0.06265400 | -1.60943500 | -0.86783400 |
| C | 0.56121600  | -0.99219900 | 0.22234900  |
| C | -0.22575400 | -0.52894800 | 1.28051900  |
| C | -1.60818600 | -0.67532400 | 1.25395200  |
| H | -1.92554900 | -2.22174000 | -1.76339400 |
| H | 0.23089500  | -0.04019900 | 2.13487600  |
| H | -2.22357100 | -0.31233700 | 2.07146600  |
| C | 2.03836700  | -0.77798800 | 0.21952100  |
| C | 2.66113400  | 0.06302200  | 1.29878200  |
| H | 2.14088300  | 1.01521900  | 1.40614500  |
| H | 2.60780100  | -0.49105800 | 2.24140700  |
| H | 3.71377900  | 0.24268900  | 1.06457700  |
| O | 2.07223400  | 0.46919300  | -1.18222700 |
| N | 2.78626000  | -1.80512800 | -0.20101500 |
| H | 2.40409900  | -2.49426300 | -0.83600400 |
| H | 3.79503500  | -1.71631800 | -0.18733600 |
| H | 1.17216500  | 1.06528900  | -1.22711600 |
| H | 0.52171100  | -1.94535900 | -1.72079000 |
| H | 2.82328600  | 1.07166700  | -1.06088900 |
| O | -0.05378400 | 1.69690900  | -1.32616800 |
| C | -0.38638300 | 2.31115300  | -0.24850500 |
| O | 0.42424300  | 2.63873100  | 0.64223800  |
| C | -1.85103200 | 2.67250500  | -0.10619800 |
| H | -2.02456700 | 3.62027200  | -0.62827300 |
| H | -2.48731400 | 1.91215100  | -0.56479200 |
| H | -2.11530600 | 2.80409900  | 0.94465200  |
| O | -3.57359000 | -1.38074200 | 0.16399500  |
| H | -3.89009700 | -1.80333000 | -0.64838000 |

Table S60. Optimized structure of iminium in cartesian coordinates  
(M06-2X/6-311++G(d,p)//M06-2X/6-31+G(d,p))

---

Sum of electronic and thermal Free Energies = -440.523793 Hartrees  
Number of imaginary frequencies = 0

---

|   |             |             |             |
|---|-------------|-------------|-------------|
| C | -2.18125300 | -0.01147800 | -0.00249000 |
| C | -1.51404300 | 1.21948200  | 0.08364400  |
| C | -0.13382400 | 1.25008400  | 0.08423800  |
| C | 0.61475900  | 0.05771000  | 0.00135100  |
| C | -0.07389900 | -1.16699800 | -0.06963800 |
| C | -1.45772200 | -1.20713800 | -0.07743200 |
| H | -2.09504600 | 2.13281600  | 0.15665900  |
| H | 0.47233000  | -2.10206900 | -0.13216400 |
| H | -1.98575900 | -2.15394900 | -0.14020600 |
| C | 2.07048000  | 0.05711400  | -0.00472800 |
| C | 2.84228300  | -1.20978900 | 0.14195600  |
| H | 2.51694800  | -1.74542600 | 1.03702200  |
| H | 2.64772400  | -1.84968300 | -0.72431200 |
| H | 3.91221300  | -1.00983800 | 0.20042200  |
| N | 2.74646700  | 1.15760700  | -0.14638300 |
| H | 2.30798400  | 2.06107100  | -0.29837800 |
| H | 3.76237800  | 1.14301400  | -0.12416900 |
| H | 0.35050000  | 2.21746700  | 0.17734700  |
| O | -3.52738100 | 0.01833100  | -0.00178300 |
| H | -3.89619000 | -0.87722100 | -0.05467800 |

---

Table S61. Optimized TSS3 in cartesian coordinates (M06-2X/6-311++G(d,p)//M06-2X/6-31+G(d,p))

---

Sum of electronic and thermal Free Energies = -560.110014 Hartrees  
Number of imaginary frequencies = 1

---

|   |             |             |             |
|---|-------------|-------------|-------------|
| C | -3.08660400 | 0.19191800  | -0.21529700 |
| C | -2.27704100 | 1.22922300  | 0.26220000  |
| C | -0.92591600 | 1.00258300  | 0.47144200  |
| C | -0.35785000 | -0.25125000 | 0.20821400  |
| C | -1.17734100 | -1.27824400 | -0.26734700 |
| C | -2.53665000 | -1.06176000 | -0.48036100 |
| H | -2.71843400 | 2.20171000  | 0.45670700  |
| H | -0.76915400 | -2.26692800 | -0.45321000 |
| H | -3.17025400 | -1.86586300 | -0.84426000 |
| C | 1.09027200  | -0.50373900 | 0.49578400  |
| C | 1.58497800  | -0.25483700 | 1.89960200  |
| H | 1.24190600  | 0.71119200  | 2.27043100  |
| H | 1.17818700  | -1.04489800 | 2.54015100  |
| H | 2.67743200  | -0.29251700 | 1.93232400  |
| H | -0.29672800 | 1.81628400  | 0.82466400  |

|   |             |             |             |
|---|-------------|-------------|-------------|
| H | 1.58408000  | 0.72686900  | -0.08612300 |
| N | 1.65669200  | -1.54614100 | -0.13147900 |
| H | 1.36654300  | -1.78641300 | -1.07260300 |
| H | 2.60107100  | -1.81353100 | 0.12220700  |
| H | 1.90220000  | 1.93713500  | -1.60249400 |
| H | 2.53788700  | 2.43174800  | 0.28472500  |
| C | 3.69526300  | 0.70577700  | -0.76953700 |
| N | 4.60925600  | -0.00042600 | -0.89915000 |
| B | 2.41307300  | 1.59552000  | -0.56919700 |
| O | -4.40528500 | 0.46605300  | -0.40052000 |
| H | -4.87411800 | -0.31285600 | -0.73616900 |

Table S62. Optimized structure of ethyl-4-hydroxyphenyl-amine in cartesian coordinates (M06-2X/6-311++G(d,p)//M06-2X/6-31+G(d,p))

Sum of electronic and thermal Free Energies = -441.265812 Hartrees

Number of imaginary frequencies = 0

|   |             |             |             |
|---|-------------|-------------|-------------|
| C | 2.19748300  | -0.05626200 | -0.02137000 |
| C | 1.38697800  | -1.18763600 | -0.13834500 |
| C | 0.00226700  | -1.05174300 | -0.07552100 |
| C | -0.59645200 | 0.19971400  | 0.10736500  |
| C | 0.23489700  | 1.31656200  | 0.22786500  |
| C | 1.62261800  | 1.20006500  | 0.16337400  |
| H | 1.84273900  | -2.16470400 | -0.27985200 |
| H | -0.20809600 | 2.29911700  | 0.37549300  |
| H | 2.26435500  | 2.07112200  | 0.25829800  |
| C | -2.10518000 | 0.34971100  | 0.12974200  |
| C | -2.70096700 | 0.16016300  | -1.26435600 |
| H | -2.28703400 | 0.89175100  | -1.96477700 |
| H | -2.48029200 | -0.84562600 | -1.63835000 |
| H | -3.78891400 | 0.28822100  | -1.23662200 |
| H | -0.62230200 | -1.93642200 | -0.16675000 |
| O | 3.56241400  | -0.12648100 | -0.07857800 |
| H | 3.84648500  | -1.04174900 | -0.21647200 |
| N | -2.70102900 | -0.64444900 | 1.03364800  |
| H | -2.37403100 | -0.48474400 | 1.98459600  |
| H | -3.71101000 | -0.51573200 | 1.05073200  |
| H | -2.32387300 | 1.37831700  | 0.45427300  |

## 10. OPTIMIZED GEOMETRIES FOR THE 4-(N-DIMETHYLAMINO)ACETOPHENONE'S AMINATION

Table S63. Optimized structure of 4-(N-dimethylamino)acetophenone in cartesian coordinates (M06-2X/6-311++G(d,p)//M06-2X/6-31+G(d,p))

| Sum of electronic and thermal Free Energies = -518.631242 Hartrees |             |             |             |
|--------------------------------------------------------------------|-------------|-------------|-------------|
| Number of imaginary frequencies = 0                                |             |             |             |
| C                                                                  | 1.36902000  | 0.00205600  | -0.04209900 |
| C                                                                  | 0.66766400  | -1.23472500 | -0.03063500 |
| C                                                                  | -0.71351700 | -1.26175700 | -0.01721400 |
| C                                                                  | -1.47574600 | -0.08104900 | -0.00860800 |
| C                                                                  | -0.78554100 | 1.14202000  | -0.01245800 |
| C                                                                  | 0.59785800  | 1.19385100  | -0.02661200 |
| H                                                                  | 1.21205600  | -2.17115600 | -0.03356200 |
| H                                                                  | -1.33358800 | 2.07972500  | -0.00089600 |
| H                                                                  | 1.08527600  | 2.16100100  | -0.02303800 |
| C                                                                  | -2.94924300 | -0.15714400 | 0.00997200  |
| C                                                                  | -3.74796600 | 1.12198300  | 0.02975700  |
| H                                                                  | -4.81159500 | 0.88153900  | 0.04247400  |
| H                                                                  | -3.49723100 | 1.71640600  | 0.91402800  |
| H                                                                  | -3.52129700 | 1.72894400  | -0.85246800 |
| O                                                                  | -3.52908900 | -1.24448800 | 0.01018600  |
| H                                                                  | -1.22580900 | -2.21959700 | -0.01002500 |
| N                                                                  | 2.73047500  | 0.04012100  | -0.06800700 |
| C                                                                  | 3.42208100  | 1.31539700  | 0.02865900  |
| H                                                                  | 3.13533900  | 1.98132100  | -0.79195800 |
| H                                                                  | 3.20993100  | 1.82353100  | 0.97882300  |
| H                                                                  | 4.49485400  | 1.13966100  | -0.03863700 |
| C                                                                  | 3.49264300  | -1.19198800 | 0.05931000  |
| H                                                                  | 3.27664700  | -1.70696300 | 1.00451700  |
| H                                                                  | 3.27628400  | -1.87806100 | -0.76654100 |
| H                                                                  | 4.55499500  | -0.95315100 | 0.03142300  |

Table S64. Optimized TSS1 (nucleophilic attack) for pathway a in cartesian coordinates (M06-2X/6-311++G(d,p)//M06-2X/6-31+G(d,p))

| Sum of electronic and thermal Free Energies = -575.131475 Hartrees |             |             |             |
|--------------------------------------------------------------------|-------------|-------------|-------------|
| Number of imaginary frequencies = 1                                |             |             |             |
| C                                                                  | 1.71607400  | 0.01324600  | -0.14786500 |
| C                                                                  | 1.02931800  | 1.24583400  | -0.09792900 |
| C                                                                  | -0.36139400 | 1.29103500  | -0.10562100 |
| C                                                                  | -1.13552500 | 0.13057500  | -0.15239400 |
| C                                                                  | -0.45802200 | -1.09340000 | -0.18326600 |
| C                                                                  | 0.93035000  | -1.16170900 | -0.17295800 |
| H                                                                  | 1.57750600  | 2.17948100  | -0.05981200 |
| H                                                                  | -1.01437100 | -2.02754400 | -0.19988400 |

|   |             |             |             |
|---|-------------|-------------|-------------|
| H | 1.39947300  | -2.13808000 | -0.18679900 |
| C | -2.65359300 | 0.23967300  | -0.17352100 |
| C | -3.36196400 | -0.76391700 | -1.07660600 |
| H | -3.15263600 | -0.48124500 | -2.11431300 |
| H | -3.03664100 | -1.79568500 | -0.92752100 |
| H | -4.44063700 | -0.69712900 | -0.91000700 |
| O | -3.16217400 | 1.40408800  | -0.09638900 |
| N | -3.02480900 | -0.57188200 | 1.48198400  |
| H | -2.67853400 | -1.52147400 | 1.61830000  |
| H | -4.03776100 | -0.56859100 | 1.60202700  |
| H | -0.86038200 | 2.25524500  | -0.07495400 |
| H | -2.61503100 | 0.03168700  | 2.19409600  |
| N | 3.10152600  | -0.04193400 | -0.18735300 |
| C | 3.74151500  | -1.31472800 | 0.10941300  |
| H | 3.49634900  | -1.68283900 | 1.11772400  |
| H | 3.45050200  | -2.07650500 | -0.61830400 |
| H | 4.82208700  | -1.18747900 | 0.03801200  |
| C | 3.83886700  | 1.14665700  | 0.21545600  |
| H | 3.62608600  | 1.98417200  | -0.45383400 |
| H | 3.60408100  | 1.45512200  | 1.24588800  |
| H | 4.90652000  | 0.93527700  | 0.14982100  |

Table S65. Optimized TSS1 (nucleophilic attack) for pathway c in cartesian coordinates (M06-2X/6-311++G(d,p)//M06-2X/6-31+G(d,p))

Sum of electronic and thermal Free Energies = -804.177312 Hartrees  
Number of imaginary frequencies = 1

|   |             |             |             |
|---|-------------|-------------|-------------|
| C | -3.30784900 | -0.08863500 | 0.06544800  |
| C | -2.47762200 | -1.22870900 | 0.18072400  |
| C | -1.09932000 | -1.12153000 | 0.05527400  |
| C | -0.47738800 | 0.10446000  | -0.20418400 |
| C | -1.29623500 | 1.23273300  | -0.33556500 |
| C | -2.67552200 | 1.14769700  | -0.21072600 |
| H | -2.90731500 | -2.20580900 | 0.36561800  |
| H | -0.86221000 | 2.20880300  | -0.53187600 |
| H | -3.26193500 | 2.05108700  | -0.32586500 |
| C | 1.01010900  | 0.16327900  | -0.34514700 |
| C | 1.61501600  | 1.25394500  | -1.19769800 |
| H | 1.45554000  | 0.97490300  | -2.24632700 |
| H | 1.16560600  | 2.23153700  | -1.02621000 |
| H | 2.68970400  | 1.31686000  | -1.01295300 |
| O | 1.65376900  | -0.92029800 | -0.21534900 |
| N | 1.42307200  | 1.11711700  | 1.48965700  |
| H | 1.12209000  | 2.07817700  | 1.63741300  |
| H | 2.44008700  | 1.06097600  | 1.55658800  |



|   |             |             |             |
|---|-------------|-------------|-------------|
| H | 3.06639100  | -0.93375800 | -0.45923800 |
| O | 4.09520800  | -1.03659300 | -0.66835900 |
| C | 4.84043700  | -0.28779900 | 0.11502800  |
| C | 6.31248000  | -0.40599000 | -0.15632800 |
| H | 6.61998900  | -1.44893200 | -0.03978900 |
| H | 6.51304300  | -0.11392700 | -1.19108100 |
| H | 6.87659200  | 0.22845600  | 0.52621100  |
| O | 4.37241100  | 0.44236600  | 0.98610000  |
| H | -0.48905300 | -2.01491600 | 0.14753600  |
| H | 1.01461300  | 0.53449600  | 2.21748400  |
| N | -4.67395700 | -0.17396100 | 0.22472000  |
| C | -5.29417500 | -1.48996700 | 0.21976900  |
| H | -5.12325900 | -2.02741800 | -0.72485700 |
| H | -4.91362300 | -2.10279200 | 1.04138300  |
| H | -6.36821300 | -1.37229900 | 0.36447600  |
| C | -5.49660400 | 0.94363500  | -0.21309500 |
| H | -5.25585200 | 1.85020000  | 0.34878800  |
| H | -5.37426600 | 1.15488000  | -1.28575300 |
| H | -6.54280200 | 0.70487000  | -0.02231800 |

Table S66. Optimized structure of the zwitterionic intermediate for pathway a in cartesian coordinates (M06-2X/6-311++G(d,p)//M06-2X/6-31+G(d,p))

Sum of electronic and thermal Free Energies = -575.129651 Hartrees  
Number of imaginary frequencies = 0

|   |             |             |             |
|---|-------------|-------------|-------------|
| C | 1.71779000  | 0.00877200  | -0.13955800 |
| C | 1.01932100  | 1.23392200  | -0.10463300 |
| C | -0.37299800 | 1.26618900  | -0.07766000 |
| C | -1.13642200 | 0.09931100  | -0.07582100 |
| C | -0.44529100 | -1.11759500 | -0.09603500 |
| C | 0.94424800  | -1.17311900 | -0.11719300 |
| H | 1.55800700  | 2.17395700  | -0.10185800 |
| H | -0.99048500 | -2.05972100 | -0.08548700 |
| H | 1.42214000  | -2.14537000 | -0.12073200 |
| C | -2.67207300 | 0.18531100  | -0.06031000 |
| C | -3.29869600 | -0.66783800 | -1.17269800 |
| H | -3.02873900 | -0.21826000 | -2.13266700 |
| H | -2.96121000 | -1.70881200 | -1.16962100 |
| H | -4.38889800 | -0.64377900 | -1.07248800 |
| O | -3.17316700 | 1.39902200  | 0.04108600  |
| N | -3.08256500 | -0.60194600 | 1.29243200  |
| H | -2.78089900 | -1.57867000 | 1.33847500  |
| H | -4.10192800 | -0.56803300 | 1.37477700  |
| H | -0.88150400 | 2.22536200  | -0.05485100 |
| H | -2.68533500 | -0.09661100 | 2.08799100  |

|   |            |             |             |
|---|------------|-------------|-------------|
| N | 3.10570000 | -0.03519300 | -0.21115900 |
| C | 3.83595200 | 1.16954000  | 0.15531300  |
| H | 3.59730400 | 1.99245300  | -0.52302300 |
| H | 3.62073100 | 1.49298600  | 1.18574100  |
| H | 4.90477100 | 0.97092100  | 0.06853800  |
| C | 3.75918100 | -1.28963700 | 0.13257900  |
| H | 3.52984500 | -1.61519500 | 1.15933700  |
| H | 3.46572800 | -2.08479000 | -0.55727200 |
| H | 4.83778000 | -1.15776500 | 0.04163400  |

Table S67. Optimized structure of the hydroxi-ammonium ion in cartesian coordinates (M06-2X/6-311++G(d,p)//M06-2X/6-31+G(d,p))

Sum of electronic and thermal Free Energies = -804.192254 Hartrees  
Number of imaginary frequencies = 0

|   |             |             |             |
|---|-------------|-------------|-------------|
| C | -3.29996500 | 0.03597900  | -0.13413500 |
| C | -2.52234100 | 1.21338300  | -0.16155300 |
| C | -1.13461500 | 1.16220100  | -0.06418500 |
| C | -0.46006400 | -0.05035400 | 0.07978200  |
| C | -1.22614200 | -1.21968800 | 0.13034900  |
| C | -2.61104500 | -1.18758300 | 0.02990100  |
| H | -2.99462900 | 2.18318900  | -0.26051400 |
| H | -0.74439900 | -2.18786100 | 0.25441700  |
| H | -3.15365700 | -2.12356900 | 0.08121400  |
| C | 1.05326900  | -0.10408100 | 0.19870200  |
| C | 1.52485300  | -0.79081500 | 1.47663900  |
| H | 1.15892200  | -0.21840400 | 2.33226000  |
| H | 1.14269600  | -1.81247600 | 1.54554100  |
| H | 2.61871500  | -0.81821600 | 1.50715500  |
| O | 1.58146700  | 1.17184700  | 0.06580800  |
| N | 1.60723200  | -0.90910600 | -0.96896800 |
| H | 1.29021300  | -1.88266900 | -0.95066600 |
| H | 2.68473200  | -0.87978100 | -0.91882100 |
| H | 2.57903800  | 1.14321200  | 0.22538000  |
| O | 4.15220800  | 1.10497700  | 0.40793900  |
| C | 4.79230000  | 0.15225300  | -0.12137500 |
| C | 6.30252200  | 0.16073000  | -0.02808200 |
| H | 6.67988400  | -0.85227600 | 0.12689700  |
| H | 6.70222200  | 0.52562200  | -0.98042300 |
| H | 6.64478800  | 0.81975600  | 0.77071800  |
| O | 4.25204300  | -0.80630100 | -0.75188600 |
| H | -0.57208000 | 2.08930200  | -0.09290000 |
| H | 1.29864500  | -0.48870500 | -1.85026100 |
| N | -4.67806300 | 0.07325700  | -0.27548100 |
| C | -5.34571900 | 1.35405400  | -0.09649600 |

|   |             |             |             |
|---|-------------|-------------|-------------|
| H | -5.17306400 | 1.78021600  | 0.90372900  |
| H | -5.00890300 | 2.07660200  | -0.84421900 |
| H | -6.41789400 | 1.21211800  | -0.23501300 |
| C | -5.43639500 | -1.10128400 | 0.13010400  |
| H | -5.16848600 | -1.96895800 | -0.47817900 |
| H | -5.27962200 | -1.35501700 | 1.18968800  |
| H | -6.49699500 | -0.90409800 | -0.02764900 |

Table S68. Optimized structure of the hemiaminal in cartesian coordinates (M06-2X/6-311++G(d,p)//M06-2X/6-31+G(d,p))

Sum of electronic and thermal Free Energies = -575.149009 Hartrees  
Number of imaginary frequencies = 0

|   |             |             |             |
|---|-------------|-------------|-------------|
| C | -1.71376100 | 0.00266400  | -0.13433800 |
| C | -0.98979500 | 1.21173300  | -0.09238900 |
| C | 0.40348900  | 1.21697800  | -0.06309000 |
| C | 1.14100500  | 0.03161500  | -0.07037900 |
| C | 0.42474500  | -1.16901700 | -0.08585700 |
| C | -0.96536000 | -1.19460100 | -0.11134400 |
| H | -1.50713600 | 2.16354000  | -0.08435900 |
| H | 0.95614300  | -2.11844500 | -0.07401100 |
| H | -1.46373300 | -2.15648500 | -0.11978100 |
| C | 2.66601200  | 0.01723100  | 0.00576400  |
| C | 3.12658000  | -0.30046800 | 1.42795100  |
| H | 2.72216400  | 0.44205100  | 2.12096800  |
| H | 2.78022700  | -1.29175200 | 1.73673600  |
| H | 4.22068700  | -0.27811700 | 1.47672800  |
| O | 3.10092400  | 1.32122500  | -0.36142000 |
| N | 3.29899800  | -0.93069500 | -0.90527300 |
| H | 3.20483600  | -1.88094000 | -0.55494100 |
| H | 4.06927100  | 1.30292600  | -0.37046800 |
| H | 0.91898200  | 2.17162400  | -0.03207800 |
| H | 2.84397300  | -0.89637200 | -1.81581200 |
| N | -3.10338100 | -0.01338500 | -0.21315700 |
| C | -3.80867700 | 1.21169100  | 0.13339000  |
| H | -3.60409500 | 1.53715400  | 1.16555000  |
| H | -3.53696900 | 2.02308300  | -0.54625000 |
| H | -4.88043700 | 1.03966900  | 0.02760400  |
| C | -3.78119900 | -1.24614200 | 0.16215800  |
| H | -3.51324500 | -2.06177200 | -0.51399300 |
| H | -3.54800600 | -1.55576700 | 1.19295300  |
| H | -4.85761000 | -1.09173500 | 0.08033500  |

Table S69. Optimized TSS2 (lowest energy) in cartesian coordinates  
(M06-2X/6-311++G(d,p)//M06-2X/6-31+G(d,p))

Sum of electronic and thermal Free Energies = -804.170169 Hartrees  
Number of imaginary frequencies = 1

|   |             |             |             |
|---|-------------|-------------|-------------|
| C | -3.29358700 | -0.04475300 | -0.11118900 |
| C | -2.46896400 | -1.18364500 | 0.06762800  |
| C | -1.10148300 | -1.05119400 | 0.24524700  |
| C | -0.48282000 | 0.20633900  | 0.26171500  |
| C | -1.29004200 | 1.33362800  | 0.08635400  |
| C | -2.66444200 | 1.22103000  | -0.08304200 |
| H | -2.89540600 | -2.17923900 | 0.05854700  |
| H | -0.85442900 | 2.32813600  | 0.09912700  |
| H | -3.24613800 | 2.12758000  | -0.19510800 |
| C | 0.98506300  | 0.33103500  | 0.48069200  |
| C | 1.63574400  | 1.67469900  | 0.28303900  |
| H | 1.37118400  | 2.10994300  | -0.68137200 |
| H | 1.29810900  | 2.34255400  | 1.08175300  |
| H | 2.72107900  | 1.57272400  | 0.35440100  |
| O | 1.59508900  | -0.52169900 | -1.04551500 |
| N | 1.51157500  | -0.40576500 | 1.47629700  |
| H | 1.05304100  | -1.27264000 | 1.72892800  |
| H | 2.53180100  | -0.40038100 | 1.55137600  |
| H | 1.23983900  | -0.09354400 | -1.84125000 |
| O | 4.04799000  | -0.26962100 | -1.18687400 |
| C | 4.80353200  | -0.24493500 | -0.15288000 |
| C | 6.28508800  | -0.08953100 | -0.42518400 |
| H | 6.86290600  | -0.12956500 | 0.49862500  |
| H | 6.61731600  | -0.87893700 | -1.10520200 |
| H | 6.45845600  | 0.86916200  | -0.92366100 |
| O | 4.39252200  | -0.33129900 | 1.02546800  |
| H | -0.50593100 | -1.95506900 | 0.35118200  |
| H | 2.66125800  | -0.41357000 | -1.06897800 |
| N | -4.64759000 | -0.16843100 | -0.31853600 |
| C | -5.47981000 | 1.02091600  | -0.22408200 |
| H | -6.51438500 | 0.74172100  | -0.42249100 |
| H | -5.42579200 | 1.48759700  | 0.77050500  |
| H | -5.18620300 | 1.76301200  | -0.97169900 |
| C | -5.28376300 | -1.45009800 | -0.05396600 |
| H | -6.34987600 | -1.36145300 | -0.26251300 |
| H | -4.88126200 | -2.22903200 | -0.70761400 |
| H | -5.15536900 | -1.76963700 | 0.99047800  |

Table S70. Optimized TSS2 (highest energy) in cartesian coordinates  
(M06-2X/6-311++G(d,p)//M06-2X/6-31+G(d,p))

Sum of electronic and thermal Free Energies = -804.168704 Hartrees

Number of imaginary frequencies = 1

|   |             |             |             |
|---|-------------|-------------|-------------|
| C | -1.83595500 | -0.85240200 | 0.20727300  |
| C | -1.11119000 | -1.44522600 | -0.85571500 |
| C | 0.27162400  | -1.52426500 | -0.81799700 |
| C | 1.00355100  | -1.01622800 | 0.26304900  |
| C | 0.29590200  | -0.42276400 | 1.31073600  |
| C | -1.09045700 | -0.34106400 | 1.29373600  |
| H | -1.62745500 | -1.83133300 | -1.72597200 |
| H | 0.82332800  | 0.00192100  | 2.15924400  |
| H | -1.58779200 | 0.13805000  | 2.12811800  |
| C | 2.49218500  | -1.02596000 | 0.24969600  |
| C | 3.23577400  | -0.30042700 | 1.33864600  |
| H | 2.86938400  | 0.71938900  | 1.45686900  |
| H | 3.09615700  | -0.84638000 | 2.27693200  |
| H | 4.30424200  | -0.27923100 | 1.10842300  |
| O | 2.72716600  | 0.19153700  | -1.13535400 |
| N | 3.08122000  | -2.15864600 | -0.17023600 |
| H | 2.60493800  | -2.77105700 | -0.81983200 |
| H | 4.09265300  | -2.20683500 | -0.17866700 |
| H | 1.90764200  | 0.89835200  | -1.21522300 |
| H | 0.78168300  | -1.94986400 | -1.67933900 |
| H | 3.54706200  | 0.69277700  | -1.00087500 |
| O | 0.78388800  | 1.66784300  | -1.38380300 |
| C | 0.47304900  | 2.37757800  | -0.36020600 |
| O | 1.26642700  | 2.65471500  | 0.56249200  |
| C | -0.93973100 | 2.92627700  | -0.33152000 |
| H | -1.63565200 | 2.24022600  | -0.82004700 |
| H | -1.25630800 | 3.12310900  | 0.69452100  |
| H | -0.95185200 | 3.87275500  | -0.88400900 |
| N | -3.21183500 | -0.77843200 | 0.18163900  |
| C | -3.87497000 | 0.08772600  | 1.14506200  |
| H | -3.66826700 | -0.23814200 | 2.16796700  |
| H | -3.56443000 | 1.13838500  | 1.04392500  |
| H | -4.95203800 | 0.02574400  | 0.98965600  |
| C | -3.89260500 | -0.98698600 | -1.08844900 |
| H | -3.56853200 | -0.26750400 | -1.85492500 |
| H | -3.71777200 | -1.99828900 | -1.46493900 |
| H | -4.96560200 | -0.87283800 | -0.93419100 |

Table S71. Optimized structure of iminium in cartesian coordinates  
(M06-2X/6-311++G(d,p)//M06-2X/6-31+G(d,p))

---

Sum of electronic and thermal Free Energies = -499.182628 Hartrees  
Number of imaginary frequencies = 0

---

|   |             |             |             |
|---|-------------|-------------|-------------|
| C | 1.41778500  | -0.00037700 | 0.00636000  |
| C | 0.70224300  | -1.23567900 | 0.03482900  |
| C | -0.67158900 | -1.25456500 | 0.03198900  |
| C | -1.43194700 | -0.06063200 | 0.00721200  |
| C | -0.72106800 | 1.16132000  | -0.00628300 |
| C | 0.65393600  | 1.20237700  | -0.01009900 |
| H | 1.23804600  | -2.17597800 | 0.06017700  |
| H | -1.26033900 | 2.10276700  | -0.02207600 |
| H | 1.14924300  | 2.16472200  | -0.02528600 |
| C | -2.86917900 | -0.05456900 | -0.00588600 |
| C | -3.64279300 | 1.22280600  | 0.06212200  |
| H | -3.35516300 | 1.78763500  | 0.95242600  |
| H | -3.41811000 | 1.83641400  | -0.81499500 |
| H | -4.71462900 | 1.02599400  | 0.09183400  |
| N | -3.56592200 | -1.15970400 | -0.08165400 |
| H | -3.13869200 | -2.07719300 | -0.14947500 |
| H | -4.57985100 | -1.12787200 | -0.07753800 |
| H | -1.15485700 | -2.22700000 | 0.06039800  |
| N | 2.76544500  | 0.02537000  | -0.00244400 |
| C | 3.47519600  | 1.29790000  | -0.04342900 |
| H | 3.20854800  | 1.86855600  | -0.93971400 |
| H | 3.24991200  | 1.90477900  | 0.84049300  |
| H | 4.54553400  | 1.10193200  | -0.06551600 |
| C | 3.52655900  | -1.21767200 | 0.02182200  |
| H | 3.30103600  | -1.80004100 | 0.92161100  |
| H | 3.30937000  | -1.83117200 | -0.85953100 |
| H | 4.58842800  | -0.97865900 | 0.02406300  |

---

Table S72. Optimized TSS3 in cartesian coordinates (M06-2X/6-311++G(d,p)//M06-2X/6-31+G(d,p))

---

Sum of electronic and thermal Free Energies = -618.764349 Hartrees  
Number of imaginary frequencies = 1

---

|   |             |             |             |
|---|-------------|-------------|-------------|
| C | -2.36329100 | -0.01175300 | 0.04522500  |
| C | -1.54661800 | 1.09807200  | 0.37908500  |
| C | -0.17820300 | 0.95224400  | 0.53334800  |
| C | 0.45224600  | -0.28516300 | 0.35315600  |
| C | -0.34329100 | -1.38070800 | 0.00397500  |
| C | -1.71818400 | -1.25388600 | -0.15218800 |
| H | -1.98062700 | 2.08132500  | 0.51234600  |
| H | 0.10398800  | -2.36109500 | -0.13255400 |
| H | -2.28923100 | -2.13432300 | -0.41964400 |

|   |             |             |             |
|---|-------------|-------------|-------------|
| C | 1.92519200  | -0.42588500 | 0.56338300  |
| C | 2.48889000  | 0.00787300  | 1.89712600  |
| H | 2.11456600  | 0.99214500  | 2.17964600  |
| H | 2.16913900  | -0.72155300 | 2.64883500  |
| H | 3.58193900  | 0.03135900  | 1.86144600  |
| H | 0.41869900  | 1.83029800  | 0.77186700  |
| H | 2.31671100  | 0.69097900  | -0.18218300 |
| N | 2.50290800  | -1.53571000 | 0.04780200  |
| H | 2.18641400  | -1.88016900 | -0.85135700 |
| H | 3.48395700  | -1.69476800 | 0.24687400  |
| H | 2.45067200  | 1.75754700  | -1.82592200 |
| H | 3.20201200  | 2.46952100  | -0.04953500 |
| C | 4.37039500  | 0.70172300  | -1.02639000 |
| N | 5.30412600  | 0.02228800  | -1.15636500 |
| B | 3.06771600  | 1.55543700  | -0.81572100 |
| N | -3.72812800 | 0.11362400  | -0.07295600 |
| C | -4.30788100 | 1.44687200  | -0.12831600 |
| H | -4.08738500 | 2.00592200  | 0.78521500  |
| H | -3.94078300 | 2.02489600  | -0.98907300 |
| H | -5.39102200 | 1.35439400  | -0.20725600 |
| C | -4.47543300 | -0.96394300 | -0.70332000 |
| H | -4.13994700 | -1.15376100 | -1.73340000 |
| H | -4.38228000 | -1.89168000 | -0.13146100 |
| H | -5.53066600 | -0.69231200 | -0.72511800 |

Table S73. Optimized structure of ethyl-4-(N-dimethylamino)phenyl-amine in cartesian coordinates (M06-2X/6-311++G(d,p)//M06-2X/6-31+G(d,p))

Sum of electronic and thermal Free Energies = -499.916825 Hartrees  
Number of imaginary frequencies = 0

|   |             |             |             |
|---|-------------|-------------|-------------|
| C | -1.44039900 | 0.00738600  | -0.14288200 |
| C | -0.79650400 | 1.26084100  | -0.18428900 |
| C | 0.59455800  | 1.35100300  | -0.17751300 |
| C | 1.40781000  | 0.21913200  | -0.11210900 |
| C | 0.76975100  | -1.02410400 | -0.04909500 |
| C | -0.61666000 | -1.13739600 | -0.05912900 |
| H | -1.37363200 | 2.17647900  | -0.23177400 |
| H | 1.36805600  | -1.93006300 | 0.01063900  |
| H | -1.05390300 | -2.12735900 | -0.00478600 |
| C | 2.91723000  | 0.33981000  | -0.05842100 |
| C | 3.45187300  | 0.04746500  | 1.34291900  |
| H | 3.02438100  | 0.74207100  | 2.07232600  |
| H | 3.19500300  | -0.97472200 | 1.64201000  |
| H | 4.54261700  | 0.15147700  | 1.36777500  |
| H | 1.05392500  | 2.33688700  | -0.22016000 |

|   |             |             |             |
|---|-------------|-------------|-------------|
| N | 3.53623500  | -0.60401800 | -1.00126700 |
| H | 3.24537300  | -0.38127500 | -1.95127800 |
| H | 4.54752300  | -0.48762200 | -0.97454100 |
| H | 3.16767200  | 1.38324600  | -0.30432000 |
| N | -2.82890600 | -0.09983500 | -0.20414200 |
| C | -3.60270900 | 1.09485500  | 0.10015500  |
| H | -3.39834900 | 1.48190600  | 1.11103900  |
| H | -3.39604500 | 1.88795100  | -0.62257300 |
| H | -4.66369900 | 0.85313800  | 0.02748500  |
| C | -3.42330400 | -1.34994600 | 0.24739800  |
| H | -3.10384800 | -2.18426500 | -0.38174300 |
| H | -3.16838800 | -1.58302500 | 1.29325000  |
| H | -4.50787100 | -1.27213000 | 0.16230800  |

## 11. ACID-CATALYZED REDUCTION OF ACETOPHENONE

Scheme S1. Mechanism of the acid-catalyzed reduction of acetophenone

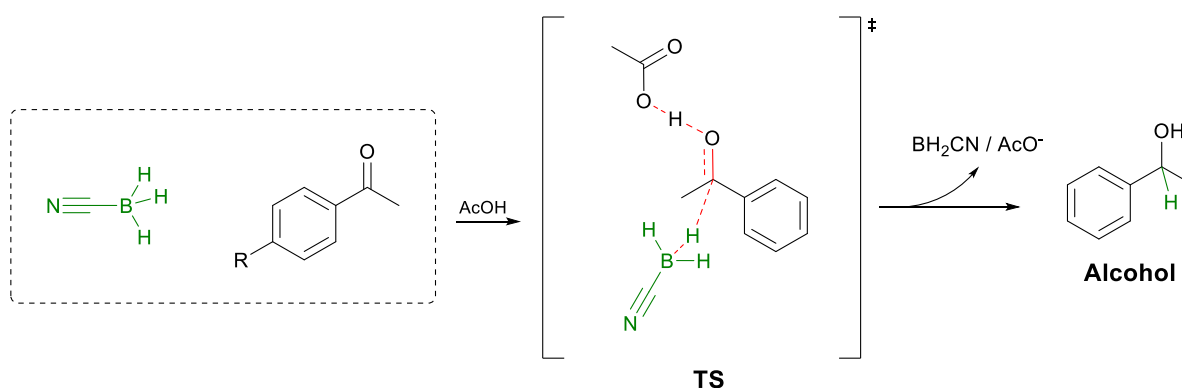

Table S74. Optimized TS for the acid-catalyzed reduction of the acetophenone (M06-2X/6-311++G(d,p)//M06-2X/6-31+G(d,p))

Sum of electronic and thermal Free Energies = -733.353250 Hartrees

Number of imaginary frequencies = 1

|   |            |             |             |
|---|------------|-------------|-------------|
| C | 4.12903900 | -1.15406100 | -0.40821800 |
| C | 3.21301400 | -1.01052300 | -1.44846100 |
| C | 1.88764500 | -0.66979400 | -1.17381300 |
| C | 1.47129500 | -0.48150200 | 0.14556400  |
| C | 2.39515200 | -0.61889700 | 1.18792900  |
| C | 3.71754100 | -0.95405300 | 0.91193200  |
| H | 5.16132500 | -1.41512600 | -0.62223000 |
| H | 3.52805100 | -1.15876800 | -2.47713400 |
| H | 2.08902100 | -0.44346200 | 2.21603000  |
| H | 4.42942400 | -1.05404000 | 1.72588500  |



|   |             |             |             |
|---|-------------|-------------|-------------|
| C | 0.02999800  | -0.12682900 | 0.42286000  |
| C | -0.66492500 | -0.89222900 | 1.53463900  |
| H | -0.81798500 | -1.91791200 | 1.18095000  |
| H | -0.06844600 | -0.91651900 | 2.44768900  |
| H | -1.63635400 | -0.44047500 | 1.74936000  |
| O | -0.67689500 | 0.14929600  | -0.63872100 |
| H | -1.83401000 | 0.30300500  | -0.45263300 |
| O | -3.01890500 | 0.55730500  | -0.30018700 |
| C | -3.78375900 | -0.48987000 | -0.30375100 |
| C | -5.25027700 | -0.20610500 | -0.08319800 |
| H | -5.38223600 | 0.27920300  | 0.88835500  |
| H | -5.60608700 | 0.48795000  | -0.84997600 |
| H | -5.83365900 | -1.12633500 | -0.11770600 |
| O | -3.36537700 | -1.64449000 | -0.47003900 |
| H | 1.17090100  | -0.55132200 | -1.97982500 |
| H | 0.24628900  | 1.00574300  | 1.14065600  |
| B | 0.22908500  | 2.31475400  | 1.22266700  |
| H | -0.94317000 | 2.56765400  | 1.19165500  |
| H | 0.83458100  | 2.52954200  | 2.23649200  |
| C | 1.00618800  | 2.72424400  | -0.08260300 |
| N | 1.58583800  | 3.00827400  | -1.04808700 |

---
